# Supplementary material for: Oral Microbiota Transplant in Dogs with Naturally Occurring Periodontitis
Source: PubMed Central journal article supplement — J Dent Res. 2021 Mar 18;100(7):764–70. doi: 10.1177/0022034521995423 (PMC8217902; doi:10.1177/0022034521995423), 2021-03-18
Supplement: sj-pdf-1-jdr-10.1177_0022034521995423.pdf [file sj-pdf-1-jdr-10.1177_0022034521995423.pdf]

## **Supplementary Appendix**

Oral microbiota transplant in dogs with naturally occurring periodontitis

### **Authors**

Beikler, Thomas<sup>1\*</sup>; Bunte, Kübra<sup>1</sup>; Chan, Yuki<sup>2</sup>; Weiher, Belinda<sup>3</sup>; Selbach, Sabine<sup>4</sup>; Peters, Ulrike<sup>1</sup>; Klocke, Astrid<sup>5</sup>; Watt, Rory M<sup>2</sup>.; Flemmig, Thomas F.<sup>2</sup>

<sup>1</sup> Department of Periodontics, Preventive and Restorative Dentistry, University Medical Center Hamburg-Eppendorf, Hamburg, Germany

<sup>2</sup> Faculty of Dentistry, The University of Hong Kong, Hong Kong SAR, People's Republic of China

<sup>3</sup> Private Practice, Duisburg, Germany

<sup>4</sup> The School of Dentistry, The University of Adelaide, Adelaide, Australia

<sup>5</sup> Private Practice, Krefeld, Germany

\* Corresponding Author:

Department of Periodontics, Preventive and Restorative Dentistry,

University Medical Center Hamburg-Eppendorf,

Address: Martinistr. 52, 20246, Hamburg, Germany

Tel. +49 7410 52282, Fax: +49 7410 55168, E-mail t.beikler@uke.de

### **16S rDNA MiSeq data processing**

Sequencing was performed at the Beijing Genome Institute (BGI) Shenzhen, China. The sequence data was de-multiplexed and quality-filtered by the following criteria, 1) reads with 20% of their original length of low quality (Q20) bases were removed; 2) reads contaminated by adapter, defined as 15 bases overlapped by reads and adapter sequence with maximal 3 bases mismatch allowed, were removed; 3) reads with ambiguous bases and its paired reads were removed; 4) reads containing any stretch of low complexity, defined as homopolymers of 10nt, were removed. Subsequently, the adaptor and primer sequences were trimmed from all reads using cutadapt 1.14 (Martin 2011) in Python 3.6.2.

### **DADA2 workflow**

The sequences were processed using the DADA2 pipeline (Callahan et al. 2017), following the official tutorial version 1.6 under the environment of R studio Version 1.1.383; R version 3.4.2

(2017-09-28); Bioconductor version 3.6 (2017-10-31); DADA2 version 1.6. Firstly the quality profiles of all the forward and reverse reads were examined and filtered by the function `filterAndTrim` using the following parameters, `truncLen=c(250,230)`, `maxN=0`, `maxEE=c(2,2)`, `truncQ=2`, `rm.phix=TRUE`. A parametric error model was then estimated from the amplicon dataset using the `learnErrors` function at the default settings until the error rates converged. The reads were dereplicated and have core samples inferred by the `derepFastq` and `dada` main function at the default settings. The forward and reverse reads were assembled using the `mergePairs` function, followed by an additional filtering of read size retaining only the merged reads between 401-450 bp. Chimeric sequences were removed using the `removeBimeraDenovo` function, which were the final output of this pipeline 1,753 ASVs from 86 samples.

### **Taxonomy Assignment**

The native implementation of the naive Bayesian classifier method (Wang et al. 2007) in the DADA2 package was used for taxonomy assignment at the default settings. A curated reference sequence database was used, which comprised the RDP trainset 16 (derived from RDP Release 11.5 that consisted of 3,356,809 aligned and annotated 16S rRNA sequences, updated on 2016-09-30), the eHOMD 16S rRNA RefSeq Version 15.1 (Chen et al. 2010, updated on 2017-11-16) and the full set of canine oral microbiome 16S rRNA gene sequences (Dewhirst et al. 2012, 416 full-length sequences). All these reference sequences were processed and formatted using the Mothur package (Schloss et al. 2009).

### **Phylogenetic analyses**

A Maximum likelihood (ML) tree containing all the aligned ASV sequences was constructed using Fasttree (Price, Dehal, & Arkin, 2010) for calculation of phylogenetic diversity and UniFrac distance.

### **Principal Response Curve**

The effect of microbiome transplantation was further evaluated with the Principal Response Curve (PRC) method using the default parameters (Van den Brink & Braak 1999). It focuses on the differences between the bacterial compositions in the test group compared to that of the control at the corresponding time. Data was logarithm transformed by taking  $\log(\text{count} + 1)$ . A clear effect was observed after Baseline in the test communities. This reveals the transfer of bacterial taxa from the donor microbiome into the test ones. For instance, there were boosts in abundances of ASV40 (*Chlorobi* G-1 sp.), ASV150 (*Neisseria* sp.), and ASV44 (*Bergeyella*

sp.) in the test group after OMT (Appendix-Figure 5 and 6). Meanwhile, some taxa that were absent in the donor healthy microbiome were reduced in the test group, such as ASV63 *Aquaspirillum* sp., ASV243 *Moraxella* sp. and ASV128 *Absconditabacteria* (SR1) G-2 sp.

## **Multivariate Statistical analyses**

### **1) Data normalization**

The 16S rRNA gene amplicon sequencing data contains high number of variables, relatively small sample sizes and many zeros entities, known as the large-p small-n problem, such that data normalization is needed for proper ecological and statistical interpretation as evaluated by Weiss and colleagues (2017). Different normalization methods were performed to fit the requirements for each analysis. Data was either normalized by the Sum of Count method, in which proportion in each sample was calculated and then scaling to the size of the smallest samples, or by random rarefying to the smallest sample size. Multivariate test statistics in this study were performed using the R package GenePiper (Tong & Chan 2020) unless otherwise specified.

### **2) Alpha-diversity analyses**

Alpha-diversity measures were calculated using the alpha-diversity module in the R package GenePiper. Shannon's entropy, Simpson diversity indices and their respective effective species numbers were calculated using the default parameters. Rarefaction curves were plotted using the diversity index curve module without normalization. When alpha-diversity measures were compared directly across samples, the dataset was normalized by random rarefying to achieve the same sampling depth. Statistical significance test and the visualization were done using the R package ggsignif.

### **3) Ordination**

Beta-diversities across samples were compared using several distance metrics including both the weighted and unweighted UniFrac, and the Bray-Curtis dissimilarities using GenePiper with normalization by the Sum of Count method. The distance matrices were visualized in Principal Coordinates Analysis (PCoA) ordinations. Permutational Multivariate Analysis of Variance (PERMANOVA) tests were performed to test if the clustering of samples was significant with p-value evaluated at 9999 random permutations.

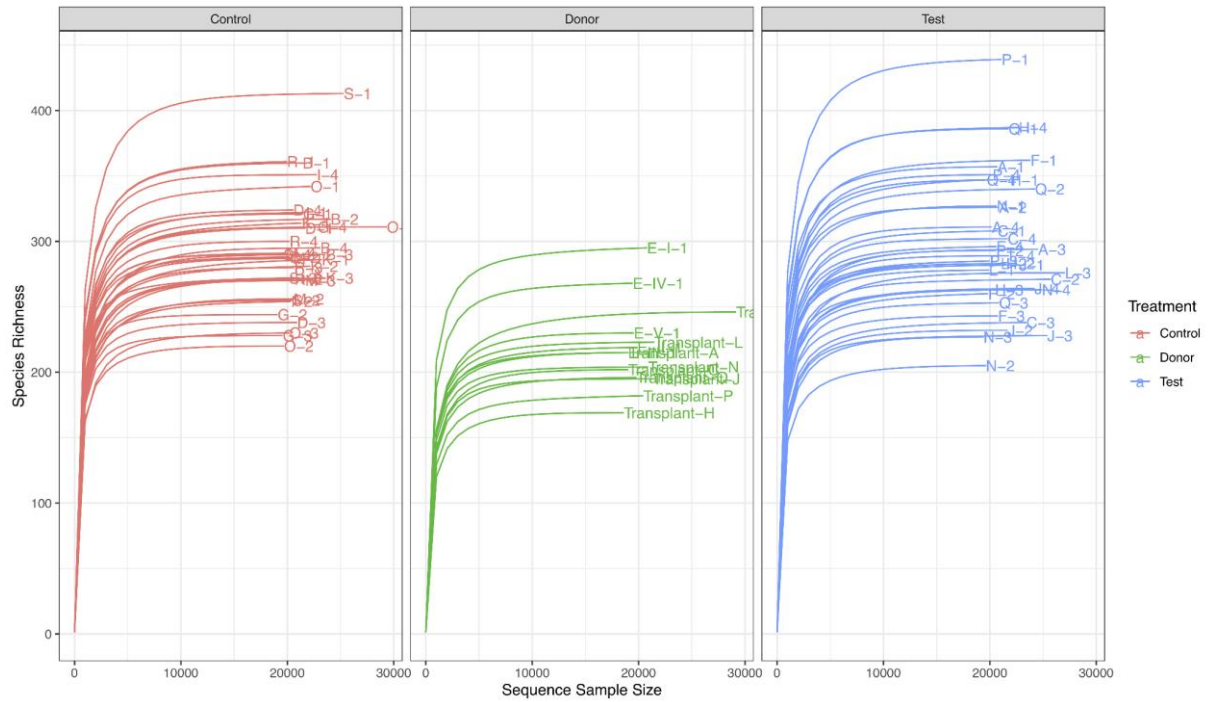

**Appendix-Figure 1** Rarefaction curves indicated sufficient sampling effort for the profiling of the oral microbiota in this study. Samples from the healthy oral microbiota donor had significantly lower species richness compared to the control and test group despite having equivalent sampling depth.

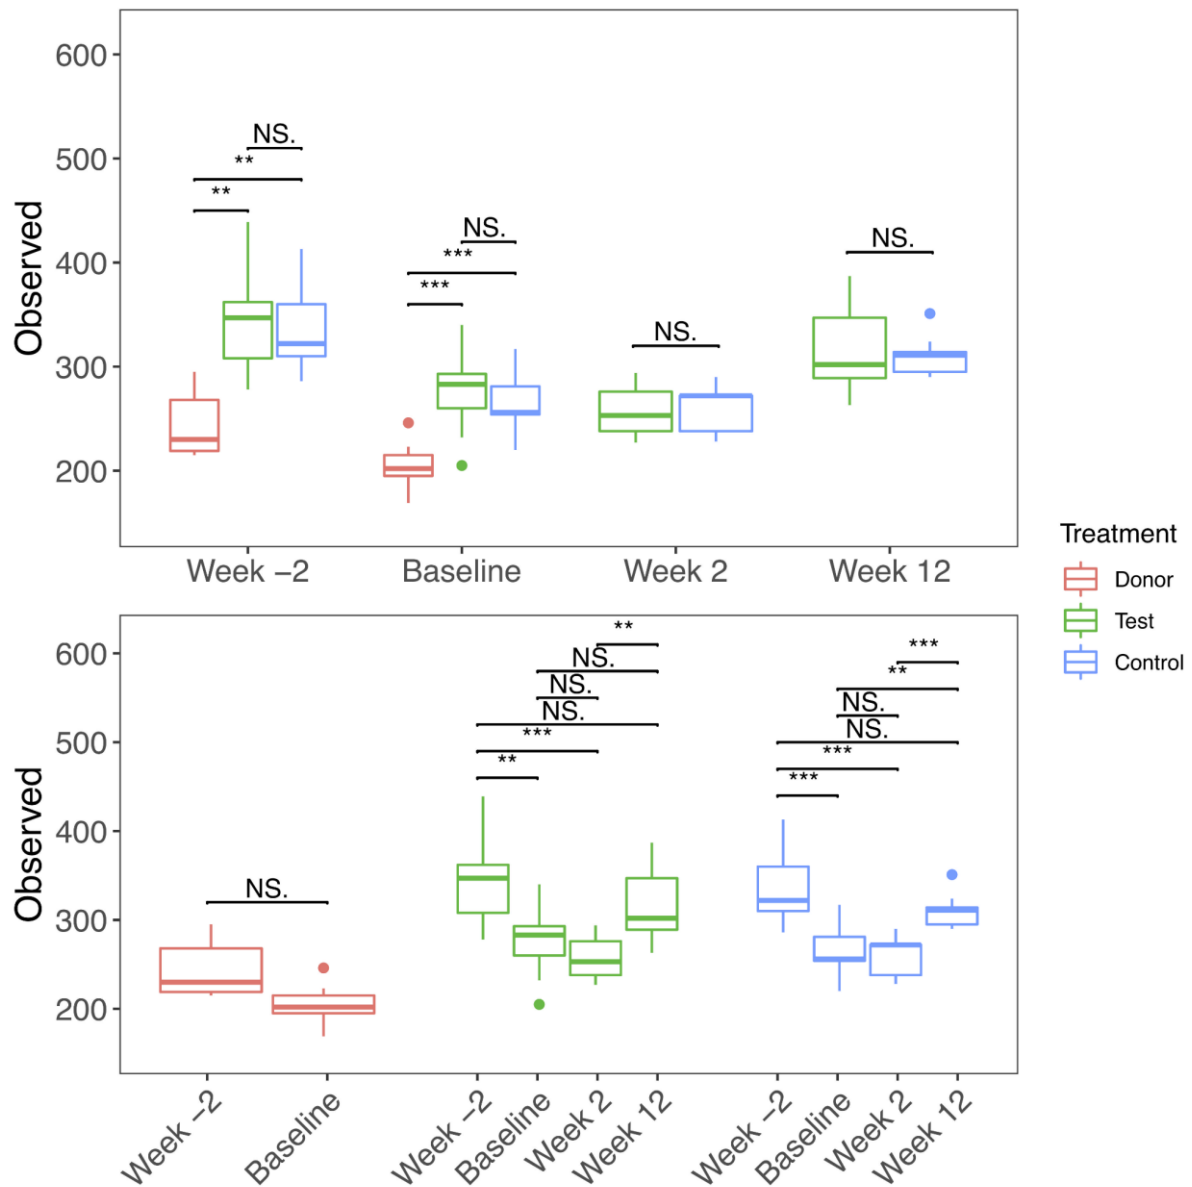

**Appendix-Figure 2** Comparison of the observed species richness of the oral microbiota of the Donor, Test and Control groups at the four experimental time-points.

The Observed species richness (Observed, y-axis; reported as the corresponding number of ASVs) in the respective sets of Donor (red coloured), Test (green coloured) and Control (blue coloured) subjects' oral microbiota samples were evaluated at the Week -2, Baseline, Week 2 and Week 12 time-points (indicated on the x-axis). The median, upper and lower quartile values, and  $\times 1.5$  interquartile ranges are indicated. The corresponding levels of species richness of the single healthy donor dog oral microbiota samples were evaluated at the Week -2 and Baseline time-points (red-coloured). Statistically significant differences were inferred by the Wilcoxon-signed rank Test at p-value cut-offs: \*\*\* indicates  $p \leq 0.001$ , \*\* indicates  $p \leq 0.01$ , \* indicates  $p \leq 0.05$ ; NS. indicates no significant difference. The two panels illustrate the results of different statistical comparisons between (upper panel) and within (lower panel) the respective sets of Test, Control and Donor subjects, at the various time-points. This plot complements the data shown in Figure 2.

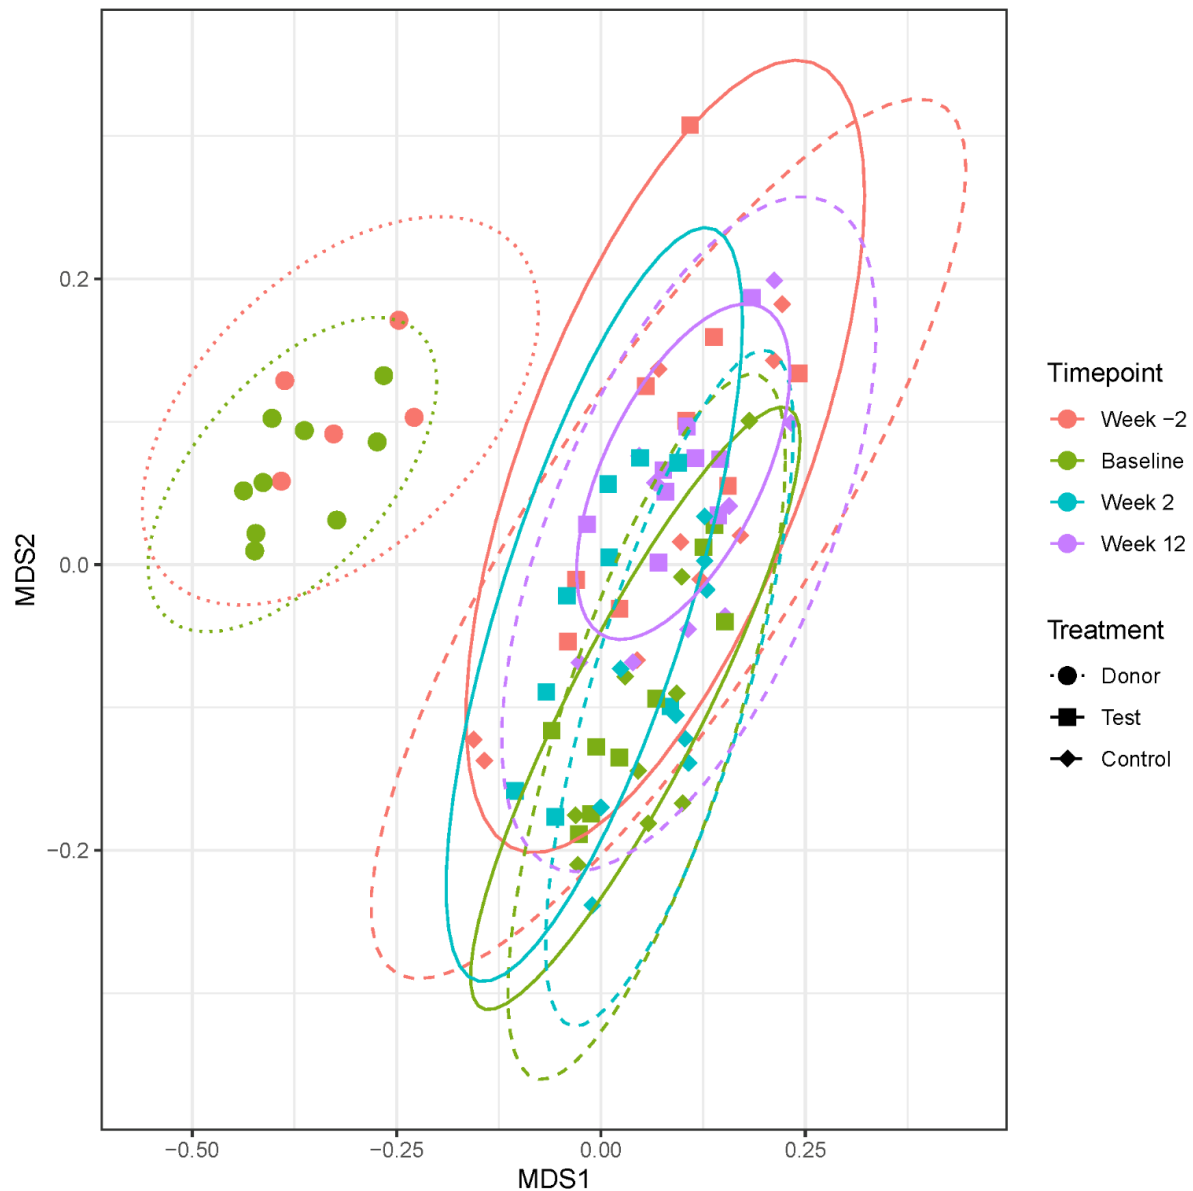

**Appendix-Figure 3 Principal Coordinates Analysis (PCoA) ordination of the oral microbiota of all samples analyzed in this study.**

The microbiota ASV abundance matrix was transformed to a pair-wise Bray-Curtis dissimilarity matrix, and the relationship among samples were visualized in this PCoA ordination plot. Each point represents an individual sample, and their relative distance in the ordination resembles the differences in their oral microbiota profiles. Periodontally-healthy Donor dog (filled circles); Test dogs (filled squares); Control Dogs (filled rhombuses). Week - 2 time-point (red coloured), baseline time-point (green coloured), Week 2 time-point (blue coloured), Week 12 time-point (purple coloured), Ellipses were plotted at a confidence level of 0.95. Dashed ellipses enclose the Control group data-points, solid ellipses encircle the Test group data-points. The healthy oral microbiota donor samples were notably distinct from the control and test groups at all time-points analyzed.



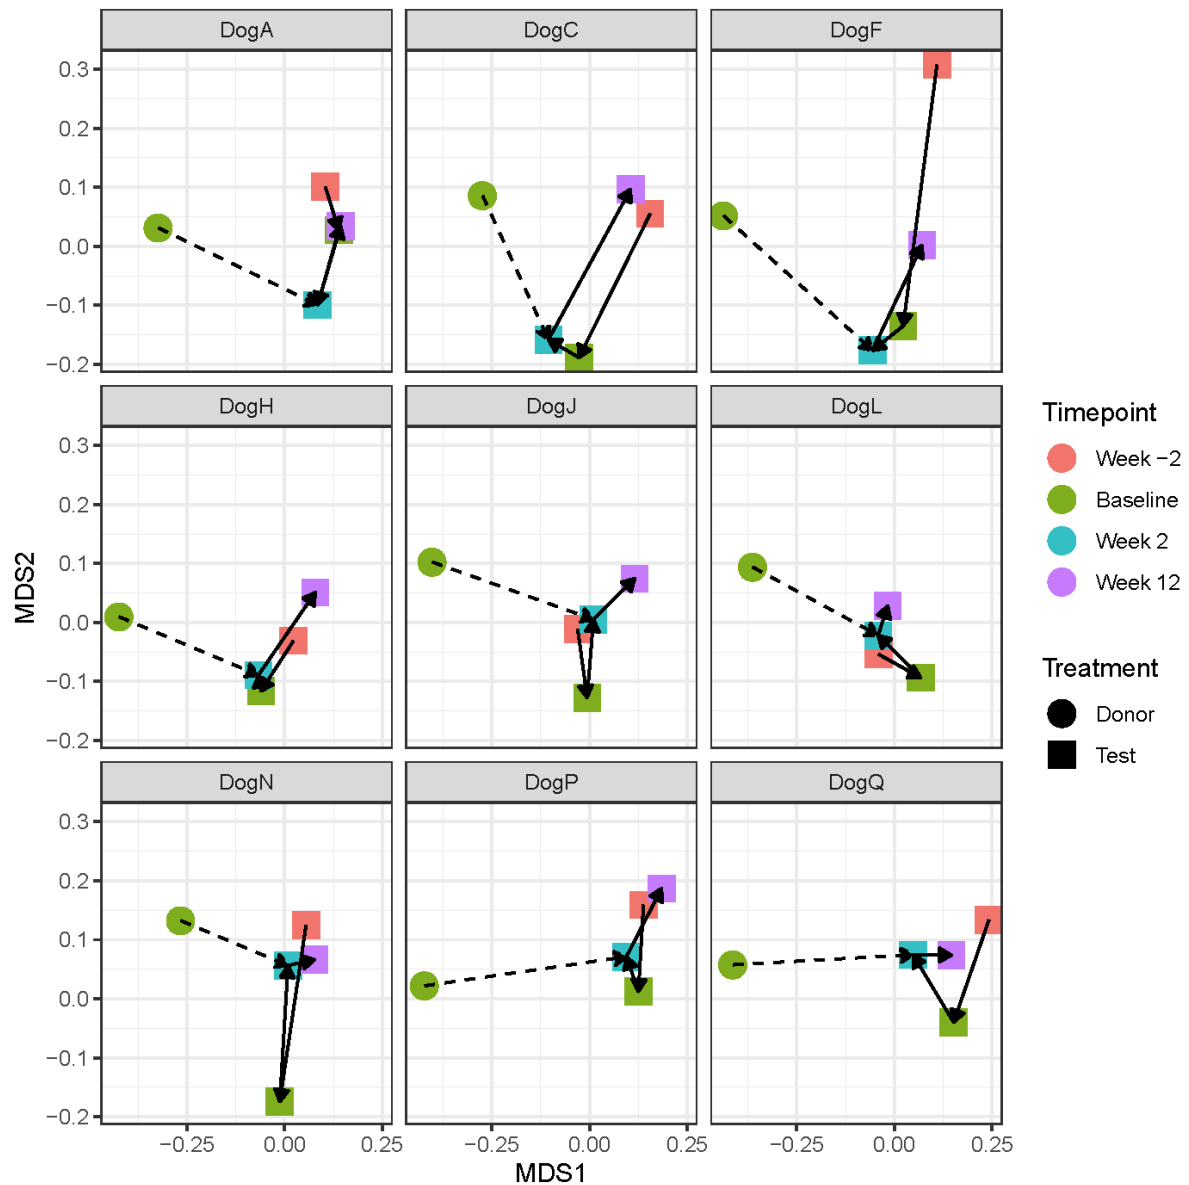

**Appendix Figure 5. PCoA plots of Test dogs' oral microbiota before and after OMT transplantation from donor.**

The nine respective panels show the PCoA plots of the ASV composition of the oral microbiota within each of the nine Test dogs (Dogs A, C, F, H, J, L, N, P, Q), as well as the corresponding oral microbiome transplant (OMT) they received from the healthy donor dog. MDS1 and MDS2 respectively refer to the two principal axes generated from PCoA analyses. The oral microbiome of the Test dogs was analyzed at four time-points: Week -2, 2 weeks before transplant (red filled squares); Baseline, immediately after oral prophylaxis (plaque removal), prior to receiving the OMT transplant; green squares); Week 2, 2 weeks after receiving OMT transplantation (blue squares); Week 12, 12 weeks after receiving OMT transplantation (purple squares). The respective OMT transplants (filled green circles) are linked to the Test dogs' microbiota at the week 2 time-point via a dashed line. The four respective time-points are linked by arrows, to indicate the 'trajectory' of the oral microbiome composition of the Test dogs during the experimental observation period. A common 'trend' in the respective trajectories may be observed in most of the respective Test dogs' oral microbiota compositions; with the composition of the oral microbiota at the Week 2 time-point generally being the most similar to that of the respective OMT.



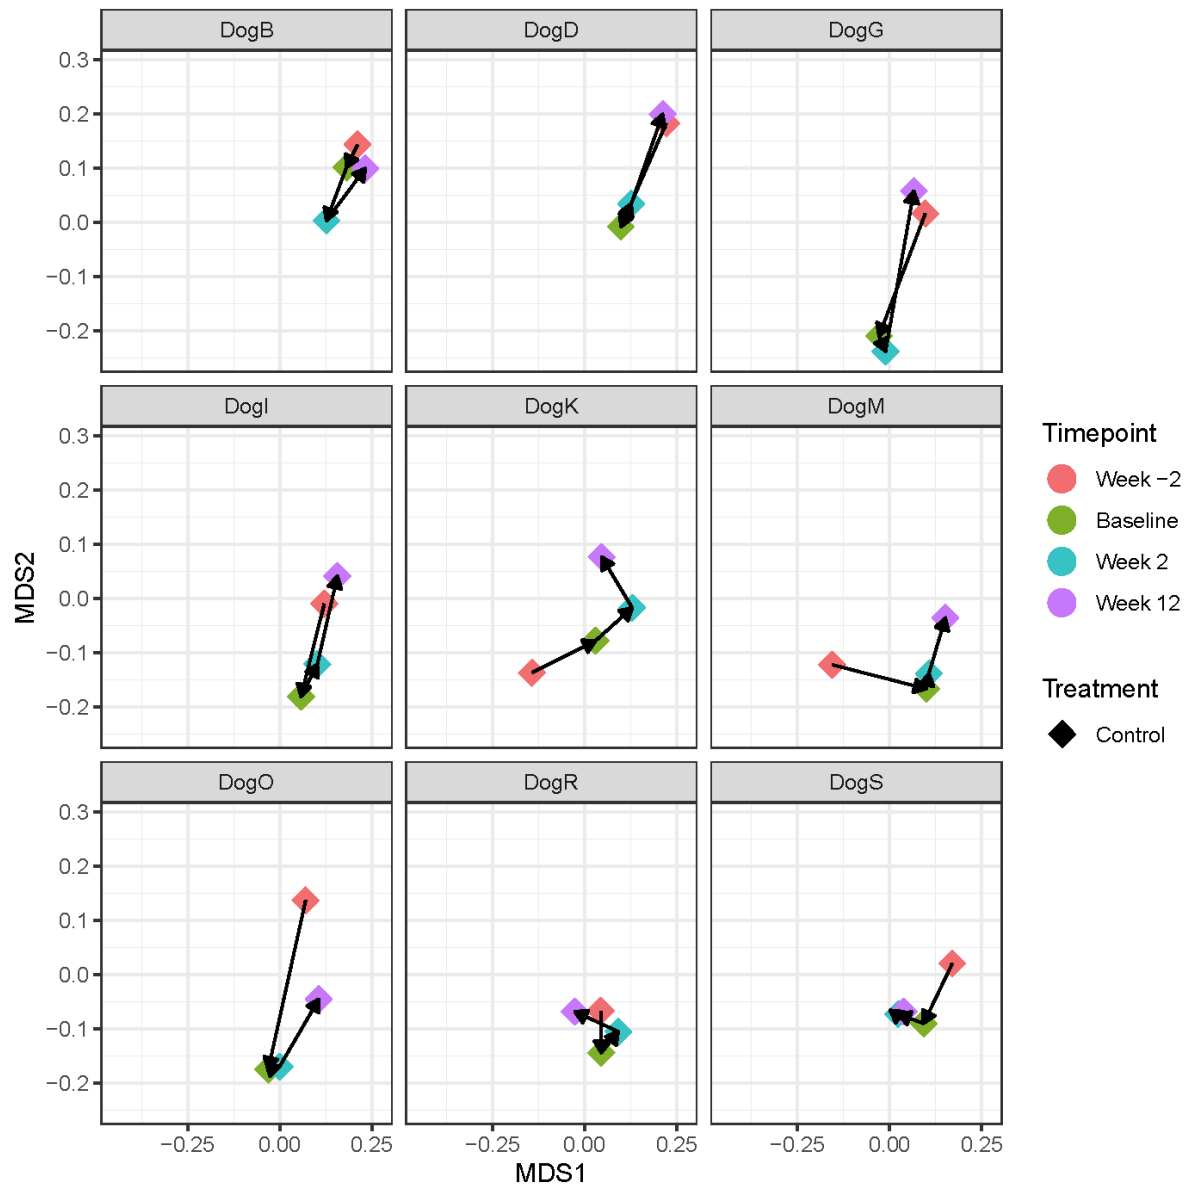

**Appendix Figure 6. PCoA plots of Control dogs' oral microbiota across the four time-points**

The nine respective panels show the PCoA plots of the ASV composition of the oral microbiota within each of the nine Control dogs (Dogs B, D, G, I, K, M, O, R, S). MDS1 and MDS2 respectively refer to the two principal axes generated from PCoA analyses. The oral microbiome of the Control dogs was analyzed at four time-points: Week -2, 2 weeks prior to oral prophylaxis (plaque removal) (filled red rhombuses); Baseline, immediately after oral prophylaxis (green rhombuses); Week 2, 2 weeks after receiving oral prophylaxis (blue rhombuses); Week 12, 12 weeks after receiving oral prophylaxis (purple rhombuses). The four respective time-points are linked by arrows, to indicate the 'trajectory' of the oral microbiome composition of the Control dogs during the experimental observation period. The respective 'trends' in the PCoAs from the Control dogs should be compared and contrasted with those obtained from the Test dogs, shown in the Appendix-Figure 4.

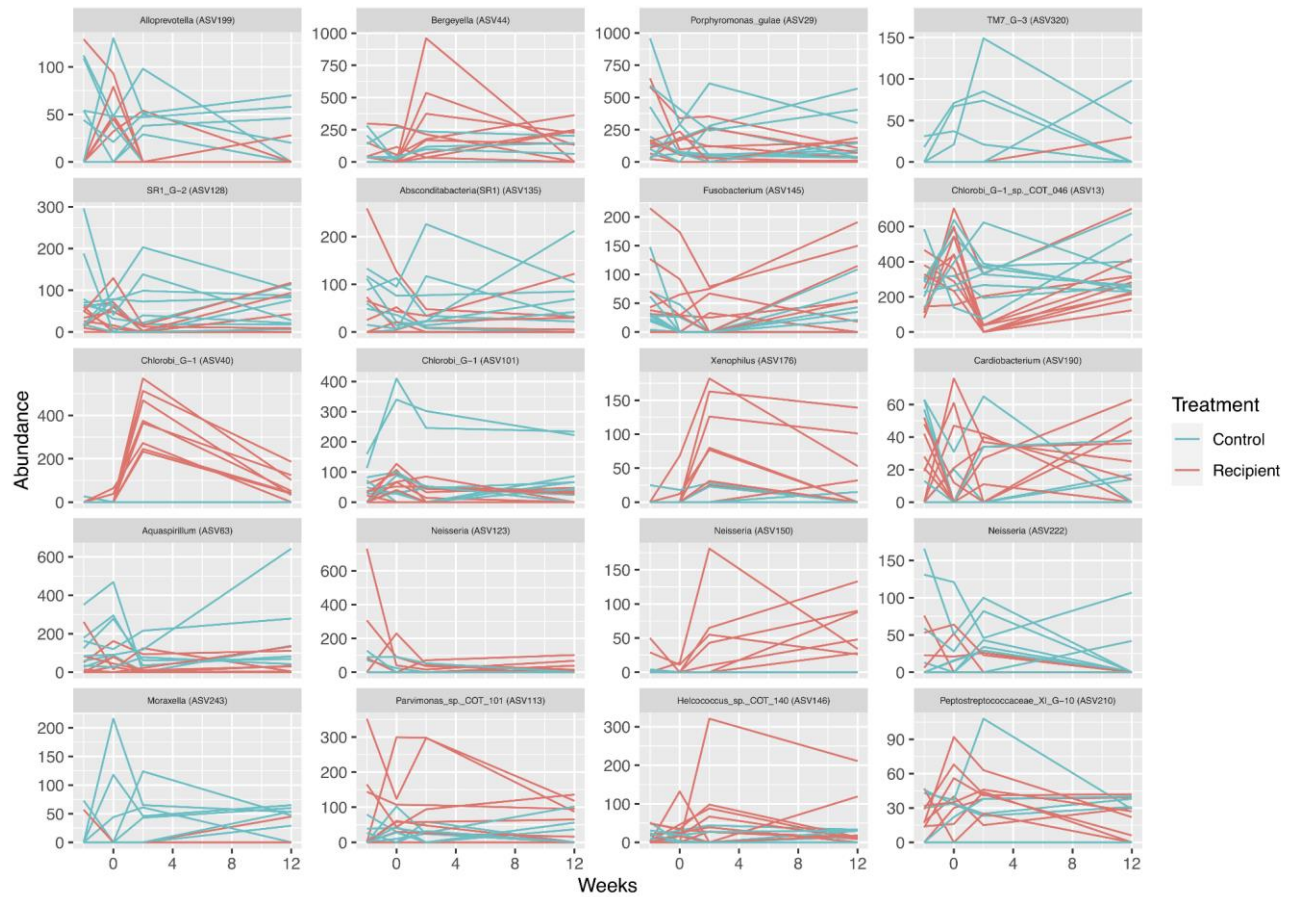

**Appendix-Figure 7. Abundance plots of the top 20 PRC scoring species.**

The relative abundance of the respective ASV is plotted on the y-axis. The four respective sampling time-points (in weeks) are plotted on the x-axis.

**Appendix-Table 1.** Differences in alpha diversity values (as evaluated by median Shannon entropy values) in the Donor, Test and Control subject groups, over the course of the trial, measured at four time-points (Week -2, Baseline, Week 2 and Week 12)

| Subject Group | Time-point | 25% Percentile | Median | 75% Percentile |
|---------------|------------|----------------|--------|----------------|
| Donor         | Wk -2      | 4.12           | 4.35   | 4.66           |
| Donor         | Baseline   | 3.98           | 4.16   | 4.23           |
| Test          | Wk -2      | 4.919          | 5.053  | 5.145          |
| Test          | Baseline   | 4.608          | 4.718  | 4.83           |
| Test          | Wk 2       | 4.419          | 4.637  | 4.708          |
| Test          | Wk 12      | 4.722          | 4.881  | 5.022          |
| Control       | Wk -2      | 4.755          | 4.959  | 5.056          |
| Control       | Baseline   | 4.622          | 4.632  | 4.774          |
| Control       | Wk 2       | 4.654          | 4.749  | 4.813          |
| Control       | Wk 12      | 4.759          | 4.875  | 4.948          |

**Appendix Table 2.** Summary of alpha diversity levels (evaluated by Shannon entropy values) in all microbiota samples collected from all subjects included in the study, at each of the four time-points.

| Id         | Dog    | Time-point | Subject Group | Shannon Entropy |
|------------|--------|------------|---------------|-----------------|
| MT-A-1     | DogA   | Wk -2      | Test          | 5.145           |
| MT-A-2     | DogA   | Baseline   | Test          | 5.058           |
| MT-A-3     | DogA   | Wk 2       | Test          | 4.876           |
| MT-A-4     | DogA   | Wk 12      | Test          | 4.919           |
| MT-B-1     | DogB   | Wk -2      | Control       | 5.171           |
| MT-B-2     | DogB   | Baseline   | Control       | 4.864           |
| MT-B-3     | DogB   | Wk 2       | Control       | 4.848           |
| MT-B-4     | DogB   | Wk 12      | Control       | 4.72            |
| MT-C-1     | DogC   | Wk -2      | Test          | 4.839           |
| MT-C-2     | DogC   | Baseline   | Test          | 4.608           |
| MT-C-3     | DogC   | Wk 2       | Test          | 4.401           |
| MT-C-4     | DogC   | Wk 12      | Test          | 4.788           |
| MT-D-1     | DogD   | Wk -2      | Control       | 4.755           |
| MT-D-2     | DogD   | Baseline   | Control       | 4.824           |
| MT-D-3     | DogD   | Wk 2       | Control       | 4.558           |
| MT-D-4     | DogD   | Wk 12      | Control       | 4.948           |
| MT-E-I-1   | DogA,C | Wk -2      | Donor         | 4.851           |
| MT-E-II-1  | DogF,H | Wk -2      | Donor         | 4.106           |
| MT-E-III-1 | DogJ,L | Wk -2      | Donor         | 4.352           |
| MT-E-IV-1  | DogN   | Wk -2      | Donor         | 4.662           |
| MT-E-V-1   | DogP   | Wk -2      | Donor         | 4.123           |
| MT-F-1     | DogF   | Wk -2      | Test          | 5.053           |
| MT-F-2     | DogF   | Baseline   | Test          | 4.708           |
| MT-F-3     | DogF   | Wk 2       | Test          | 4.669           |
| MT-F-4     | DogF   | Wk 12      | Test          | 4.881           |
| MT-G-1     | DogG   | Wk -2      | Control       | 4.97            |

|        |      |          |         |       |
|--------|------|----------|---------|-------|
| MT-G-2 | DogG | Baseline | Control | 4.622 |
| MT-G-3 | DogG | Wk 2     | Control | 4.673 |
| MT-G-4 | DogG | Wk 12    | Control | 4.728 |
| MT-H-1 | DogH | Wk -2    | Test    | 5.074 |
| MT-H-2 | DogH | Baseline | Test    | 4.756 |
| MT-H-3 | DogH | Wk 2     | Test    | 4.708 |
| MT-H-4 | DogH | Wk 12    | Test    | 5.266 |
| MT-I-1 | DogI | Wk -2    | Control | 4.959 |
| MT-I-2 | DogI | Baseline | Control | 4.603 |
| MT-I-3 | DogI | Wk 2     | Control | 4.813 |
| MT-I-4 | DogI | Wk 12    | Control | 5.181 |
| MT-J-1 | DogJ | Wk -2    | Test    | 4.789 |
| MT-J-2 | DogJ | Baseline | Test    | 4.509 |
| MT-J-3 | DogJ | Wk 2     | Test    | 4.315 |
| MT-J-4 | DogJ | Wk 12    | Test    | 4.531 |
| MT-K-1 | DogK | Wk -2    | Control | 4.66  |
| MT-K-2 | DogK | Baseline | Control | 4.774 |
| MT-K-3 | DogK | Wk 2     | Control | 4.749 |
| MT-K-4 | DogK | Wk 12    | Control | 4.759 |
| MT-L-1 | DogL | Wk -2    | Test    | 4.919 |
| MT-L-2 | DogL | Baseline | Test    | 4.83  |
| MT-L-3 | DogL | Wk 2     | Test    | 4.637 |
| MT-L-4 | DogL | Wk 12    | Test    | 4.722 |
| MT-M-1 | DogM | Wk -2    | Control | 4.673 |
| MT-M-2 | DogM | Baseline | Control | 4.632 |
| MT-M-3 | DogM | Wk 2     | Control | 4.654 |
| MT-M-4 | DogM | Wk 12    | Control | 4.964 |
| MT-N-1 | DogN | Wk -2    | Test    | 5.042 |
| MT-N-2 | DogN | Baseline | Test    | 4.282 |
| MT-N-3 | DogN | Wk 2     | Test    | 4.419 |
| MT-N-4 | DogN | Wk 12    | Test    | 4.676 |
| MT-O-1 | DogO | Wk -2    | Control | 4.926 |
| MT-O-2 | DogO | Baseline | Control | 4.571 |
| MT-O-3 | DogO | Wk 2     | Control | 4.467 |
| MT-O-4 | DogO | Wk 12    | Control | 4.82  |
| MT-P-1 | DogP | Wk -2    | Test    | 5.291 |
| MT-P-2 | DogP | Baseline | Test    | 4.718 |
| MT-P-3 | DogP | Wk 2     | Test    | 4.792 |
| MT-P-4 | DogP | Wk 12    | Test    | 5.022 |
| MT-Q-1 | DogQ | Wk -2    | Test    | 5.248 |
| MT-Q-2 | DogQ | Baseline | Test    | 4.986 |
| MT-Q-3 | DogQ | Wk 2     | Test    | 4.509 |
| MT-Q-4 | DogQ | Wk 12    | Test    | 5.079 |
| MT-R-1 | DogR | Wk -2    | Control | 5.056 |
| MT-R-2 | DogR | Baseline | Control | 4.752 |
| MT-R-3 | DogR | Wk 2     | Control | 4.767 |
| MT-R-4 | DogR | Wk 12    | Control | 4.875 |
| MT-S-1 | DogS | Wk -2    | Control | 5.214 |
| MT-S-2 | DogS | Baseline | Control | 4.632 |
| MT-S-3 | DogS | Wk 2     | Control | 4.953 |
| MT-S-4 | DogS | Wk 12    | Control | 4.898 |

|                     |      |          |       |       |
|---------------------|------|----------|-------|-------|
| <b>Transplant-A</b> | DogA | Baseline | Donor | 4.359 |
| <b>Transplant-C</b> | DogC | Baseline | Donor | 4.21  |
| <b>Transplant-F</b> | DogF | Baseline | Donor | 4.359 |
| <b>Transplant-H</b> | DogH | Baseline | Donor | 3.89  |
| <b>Transplant-J</b> | DogJ | Baseline | Donor | 4.157 |
| <b>Transplant-L</b> | DogL | Baseline | Donor | 4.226 |
| <b>Transplant-N</b> | DogN | Baseline | Donor | 3.836 |
| <b>Transplant-P</b> | DogP | Baseline | Donor | 3.984 |
| <b>Transplant-Q</b> | DogQ | Baseline | Donor | 4.162 |

**Appendix-Table 3.** Summary of species richness (evaluated by number of observed Amplicon sequence variants, ASVs) in all microbiota samples collected from all subjects included in the study, at each of the four time-points.

| <b>Id</b>         | <b>Dog</b> | <b>Timepoint</b> | <b>Treatment</b> | <b>Observed</b> |
|-------------------|------------|------------------|------------------|-----------------|
| <b>MT-A-1</b>     | DogA       | Wk -2            | Test             | 357             |
| <b>MT-A-2</b>     | DogA       | Baseline         | Test             | 326             |
| <b>MT-A-3</b>     | DogA       | Wk 2             | Test             | 294             |
| <b>MT-A-4</b>     | DogA       | Wk 12            | Test             | 311             |
| <b>MT-B-1</b>     | DogB       | Wk -2            | Control          | 360             |
| <b>MT-B-2</b>     | DogB       | Baseline         | Control          | 317             |
| <b>MT-B-3</b>     | DogB       | Wk 2             | Control          | 290             |
| <b>MT-B-4</b>     | DogB       | Wk 12            | Control          | 295             |
| <b>MT-C-1</b>     | DogC       | Wk -2            | Test             | 308             |
| <b>MT-C-2</b>     | DogC       | Baseline         | Test             | 271             |
| <b>MT-C-3</b>     | DogC       | Wk 2             | Test             | 238             |
| <b>MT-C-4</b>     | DogC       | Wk 12            | Test             | 302             |
| <b>MT-D-1</b>     | DogD       | Wk -2            | Control          | 310             |
| <b>MT-D-2</b>     | DogD       | Baseline         | Control          | 288             |
| <b>MT-D-3</b>     | DogD       | Wk 2             | Control          | 238             |
| <b>MT-D-4</b>     | DogD       | Wk 12            | Control          | 324             |
| <b>MT-E-I-1</b>   | DogA,C     | Wk -2            | Donor            | 295             |
| <b>MT-E-II-1</b>  | DogF,H     | Wk -2            | Donor            | 219             |
| <b>MT-E-III-1</b> | DogJ,L     | Wk -2            | Donor            | 215             |
| <b>MT-E-IV-1</b>  | DogN       | Wk -2            | Donor            | 268             |
| <b>MT-E-V-1</b>   | DogP,Q     | Wk -2            | Donor            | 230             |
| <b>MT-F-1</b>     | DogF       | Wk -2            | Test             | 362             |
| <b>MT-F-2</b>     | DogF       | Baseline         | Test             | 260             |
| <b>MT-F-3</b>     | DogF       | Wk 2             | Test             | 243             |
| <b>MT-F-4</b>     | DogF       | Wk 12            | Test             | 296             |
| <b>MT-G-1</b>     | DogG       | Wk -2            | Control          | 321             |
| <b>MT-G-2</b>     | DogG       | Baseline         | Control          | 244             |
| <b>MT-G-3</b>     | DogG       | Wk 2             | Control          | 228             |
| <b>MT-G-4</b>     | DogG       | Wk 12            | Control          | 311             |
| <b>MT-H-1</b>     | DogH       | Wk -2            | Test             | 347             |
| <b>MT-H-2</b>     | DogH       | Baseline         | Test             | 283             |
| <b>MT-H-3</b>     | DogH       | Wk 2             | Test             | 263             |
| <b>MT-H-4</b>     | DogH       | Wk 12            | Test             | 387             |
| <b>MT-I-1</b>     | DogI       | Wk -2            | Control          | 322             |
| <b>MT-I-2</b>     | DogI       | Baseline         | Control          | 254             |

|                     |      |          |         |     |
|---------------------|------|----------|---------|-----|
| <b>MT-I-3</b>       | DogI | Wk 2     | Control | 272 |
| <b>MT-I-4</b>       | DogI | Wk 12    | Control | 351 |
| <b>MT-J-1</b>       | DogJ | Wk -2    | Test    | 282 |
| <b>MT-J-2</b>       | DogJ | Baseline | Test    | 232 |
| <b>MT-J-3</b>       | DogJ | Wk 2     | Test    | 228 |
| <b>MT-J-4</b>       | DogJ | Wk 12    | Test    | 264 |
| <b>MT-K-1</b>       | DogK | Wk -2    | Control | 286 |
| <b>MT-K-2</b>       | DogK | Baseline | Control | 281 |
| <b>MT-K-3</b>       | DogK | Wk 2     | Control | 272 |
| <b>MT-K-4</b>       | DogK | Wk 12    | Control | 314 |
| <b>MT-L-1</b>       | DogL | Wk -2    | Test    | 278 |
| <b>MT-L-2</b>       | DogL | Baseline | Test    | 283 |
| <b>MT-L-3</b>       | DogL | Wk 2     | Test    | 276 |
| <b>MT-L-4</b>       | DogL | Wk 12    | Test    | 289 |
| <b>MT-M-1</b>       | DogM | Wk -2    | Control | 287 |
| <b>MT-M-2</b>       | DogM | Baseline | Control | 256 |
| <b>MT-M-3</b>       | DogM | Wk 2     | Control | 270 |
| <b>MT-M-4</b>       | DogM | Wk 12    | Control | 291 |
| <b>MT-N-1</b>       | DogN | Wk -2    | Test    | 327 |
| <b>MT-N-2</b>       | DogN | Baseline | Test    | 205 |
| <b>MT-N-3</b>       | DogN | Wk 2     | Test    | 227 |
| <b>MT-N-4</b>       | DogN | Wk 12    | Test    | 263 |
| <b>MT-O-1</b>       | DogO | Wk -2    | Control | 342 |
| <b>MT-O-2</b>       | DogO | Baseline | Control | 220 |
| <b>MT-O-3</b>       | DogO | Wk 2     | Control | 230 |
| <b>MT-O-4</b>       | DogO | Wk 12    | Control | 311 |
| <b>MT-P-1</b>       | DogP | Wk -2    | Test    | 439 |
| <b>MT-P-2</b>       | DogP | Baseline | Test    | 293 |
| <b>MT-P-3</b>       | DogP | Wk 2     | Test    | 285 |
| <b>MT-P-4</b>       | DogP | Wk 12    | Test    | 351 |
| <b>MT-Q-1</b>       | DogQ | Wk -2    | Test    | 386 |
| <b>MT-Q-2</b>       | DogQ | Baseline | Test    | 340 |
| <b>MT-Q-3</b>       | DogQ | Wk 2     | Test    | 253 |
| <b>MT-Q-4</b>       | DogQ | Wk 12    | Test    | 347 |
| <b>MT-R-1</b>       | DogR | Wk -2    | Control | 361 |
| <b>MT-R-2</b>       | DogR | Baseline | Control | 271 |
| <b>MT-R-3</b>       | DogR | Wk 2     | Control | 280 |
| <b>MT-R-4</b>       | DogR | Wk 12    | Control | 300 |
| <b>MT-S-1</b>       | DogS | Wk -2    | Control | 413 |
| <b>MT-S-2</b>       | DogS | Baseline | Control | 255 |
| <b>MT-S-3</b>       | DogS | Wk 2     | Control | 272 |
| <b>MT-S-4</b>       | DogS | Wk 12    | Control | 290 |
| <b>Transplant-A</b> | DogA | Baseline | Donor   | 215 |
| <b>Transplant-C</b> | DogC | Baseline | Donor   | 202 |
| <b>Transplant-F</b> | DogF | Baseline | Donor   | 246 |
| <b>Transplant-H</b> | DogH | Baseline | Donor   | 169 |
| <b>Transplant-J</b> | DogJ | Baseline | Donor   | 195 |
| <b>Transplant-L</b> | DogL | Baseline | Donor   | 223 |
| <b>Transplant-N</b> | DogN | Baseline | Donor   | 204 |
| <b>Transplant-P</b> | DogP | Baseline | Donor   | 182 |
| <b>Transplant-Q</b> | DogQ | Baseline | Donor   | 196 |

**Appendix-Table 4.** PERMANOVA statistics testing for the differences between microbiome samples based on the Bray-Curtis dissimilarities measure. Pairwise comparison of samples grouped by time-point (week -2, baseline, week 2, week 12) and treatment category (Test Control, Donor) were assessed in PERMANOVA test (permutations = 9999). F.Model: PERMANOVA test statistics termed as pseudo F-ratio which is analogous to Fisher's F-ratio. R<sup>2</sup>: coefficient of determination, which refers to the proportion of sum of squares from the total. p.adjusted: p-value is adjusted for multiple comparisons by controlling for the false discovery rate using the Benjamini and Hochberg procedure. Only the pairs with p.adjusted <0.05 are listed in this table.

| <b>pairs</b>                       | <b>F.Model</b> | <b>R<sup>2</sup></b> | <b>p.value</b> | <b>p.adjusted</b> |
|------------------------------------|----------------|----------------------|----------------|-------------------|
| Test_WK-2 vs Test_BASELINE         | 2.0138         | 0.1118               | 0.0089         | 0.0138            |
| Test_WK-2 vs Test_WK2              | 3.1900         | 0.1662               | 0.0002         | 0.0008            |
| Test_WK-2 vs Control_BASELINE      | 2.8487         | 0.1511               | 0.0003         | 0.0009            |
| Test_WK-2 vs Control_WK2           | 2.9587         | 0.1561               | 0.0001         | 0.0008            |
| Test_WK-2 vs Control_WK12          | 1.8437         | 0.1033               | 0.0033         | 0.0055            |
| Test_WK-2 vs Donor_WK-2            | 5.2870         | 0.3058               | 0.0005         | 0.0011            |
| Test_WK-2 vs Donor_BASELINE        | 9.3923         | 0.3699               | 0.0002         | 0.0008            |
| Test_BASELINE vs Test_WK12         | 1.9755         | 0.1099               | 0.003          | 0.0052            |
| Test_BASELINE vs Control_WK12      | 2.0596         | 0.1140               | 0.0018         | 0.0034            |
| Test_BASELINE vs Donor_WK-2        | 6.3931         | 0.3476               | 0.0004         | 0.0009            |
| Test_BASELINE vs Donor_BASELINE    | 9.3719         | 0.3694               | 0.0002         | 0.0008            |
| Test_WK2 vs Test_WK12              | 2.1914         | 0.1205               | 0.0021         | 0.0038            |
| Test_WK2 vs Control_WK-2           | 2.6012         | 0.1398               | 0.0004         | 0.0009            |
| Test_WK2 vs Control_BASELINE       | 1.7444         | 0.0983               | 0.0139         | 0.0209            |
| Test_WK2 vs Control_WK2            | 1.8026         | 0.1013               | 0.0082         | 0.0132            |
| Test_WK2 vs Control_WK12           | 2.6738         | 0.1432               | 0.0002         | 0.0008            |
| Test_WK2 vs Donor_WK-2             | 5.2537         | 0.3045               | 0.0012         | 0.0023            |
| Test_WK2 vs Donor_BASELINE         | 7.8518         | 0.3292               | 0.0001         | 0.0008            |
| Test_WK12 vs Control_BASELINE      | 2.4266         | 0.1317               | 0.0004         | 0.0009            |
| Test_WK12 vs Control_WK2           | 2.1390         | 0.1179               | 0.0003         | 0.0009            |
| Test_WK12 vs Donor_WK-2            | 6.4607         | 0.3500               | 0.0004         | 0.0009            |
| Test_WK12 vs Donor_BASELINE        | 10.3176        | 0.3920               | 0.0001         | 0.0008            |
| Control_WK-2 vs Donor_WK-2         | 5.1355         | 0.2997               | 0.0003         | 0.0009            |
| Control_WK-2 vs Donor_BASELINE     | 8.5923         | 0.3494               | 0.0001         | 0.0008            |
| Control_BASELINE vs Control_WK12   | 1.8095         | 0.1016               | 0.0186         | 0.0270            |
| Control_BASELINE vs Donor_WK-2     | 6.6453         | 0.3564               | 0.0006         | 0.0012            |
| Control_BASELINE vs Donor_BASELINE | 9.6813         | 0.3770               | 0.0001         | 0.0008            |
| Control_WK2 vs Donor_WK-2          | 7.2772         | 0.3775               | 0.0004         | 0.0009            |
| Control_WK2 vs Donor_BASELINE      | 10.6549        | 0.3997               | 0.0002         | 0.0008            |
| Control_WK12 vs Donor_WK-2         | 6.7741         | 0.3608               | 0.0004         | 0.0009            |
| Control_WK12 vs Donor_BASELINE     | 10.5226        | 0.3967               | 0.0002         | 0.0008            |

**Appendix-Table 5. Taxonomy of all ASVs identified in the study**

| <b>OTU</b> | <b>Kingdom</b> | <b>Phylum</b> | <b>Class</b> | <b>Order</b>  | <b>Family</b>  | <b>Genus</b> | <b>Species</b> |
|------------|----------------|---------------|--------------|---------------|----------------|--------------|----------------|
| ASV953     | Bacteria       | Bacteroidetes | Bacteroidia  | Bacteroidales | Bacteroidaceae | Bacteroides  | Bacteroides    |
| ASV1415    | Bacteria       | Bacteroidetes | Bacteroidia  | Bacteroidales | Bacteroidaceae | Bacteroidia  | Bacteroidia    |
| ASV706     | Bacteria       | Bacteroidetes | Bacteroidia  | Bacteroidales | Bacteroidaceae | Bacteroidia  | Bacteroidia    |
| ASV389     | Bacteria       | Bacteroidetes | Bacteroidia  | Bacteroidales | Bacteroidaceae | Bacteroidia  | Bacteroidia    |
| ASV339     | Bacteria       | Bacteroidetes | Bacteroidia  | Bacteroidales | Bacteroidaceae | Bacteroidia  | Bacteroidia    |
| ASV420     | Bacteria       | Bacteroidetes | Bacteroidia  | Bacteroidales | Bacteroidaceae | Bacteroidia  | Bacteroidia    |
| ASV520     | Bacteria       | Bacteroidetes | Bacteroidia  | Bacteroidales | Bacteroidaceae | Bacteroidia  | Bacteroidia    |
| ASV1383    | Bacteria       | Bacteroidetes | Bacteroidia  | Bacteroidales | Bacteroidaceae | Bacteroides  | Bacteroides    |
| ASV976     | Bacteria       | Bacteroidetes | Bacteroidia  | Bacteroidales | Bacteroidaceae | Bacteroides  | Bacteroides    |
| ASV310     | Bacteria       | Bacteroidetes | Bacteroidia  | Bacteroidales | Bacteroidaceae | Bacteroides  | Bacteroides    |
| ASV331     | Bacteria       | Bacteroidetes | Bacteroidia  | Bacteroidales | Bacteroidaceae | Bacteroidia  | Bacteroidia    |
| ASV490     | Bacteria       | Bacteroidetes | Bacteroidia  | Bacteroidales | Bacteroidaceae | Bacteroidia  | Bacteroidia    |
| ASV509     | Bacteria       | Bacteroidetes | Bacteroidia  | Bacteroidales | Bacteroidaceae | Bacteroidia  | Bacteroidia    |
| ASV590     | Bacteria       | Bacteroidetes | Bacteroidia  | Bacteroidales | Bacteroidaceae | Bacteroidia  | Bacteroidia    |
| ASV812     | Bacteria       | Bacteroidetes | Bacteroidia  | Bacteroidales | Bacteroidaceae | Bacteroidia  | Bacteroidia    |
| ASV1035    | Bacteria       | Bacteroidetes | Bacteroidia  | Bacteroidales | Bacteroidaceae | Bacteroidia  | Bacteroidia    |
| ASV865     | Bacteria       | Bacteroidetes | Bacteroidia  | Bacteroidales | Bacteroidaceae | Bacteroides  | Bacteroides    |
| ASV1006    | Bacteria       | Bacteroidetes | Bacteroidia  | Bacteroidales | Bacteroidaceae | Bacteroides  | Bacteroides    |
| ASV943     | Bacteria       | Bacteroidetes | Bacteroidia  | Bacteroidales | Bacteroidaceae | Bacteroides  | Bacteroides    |
| ASV1283    | Bacteria       | Bacteroidetes | Bacteroidia  | Bacteroidales | Bacteroidaceae | Bacteroides  | Bacteroides    |
| ASV1727    | Bacteria       | Bacteroidetes | Bacteroidia  | Bacteroidales | Bacteroidaceae | Bacteroidia  | Bacteroidia    |
| ASV874     | Bacteria       | Bacteroidetes | Bacteroidia  | Bacteroidales | Bacteroidaceae | Bacteroides  | Bacteroides    |
| ASV1518    | Bacteria       | Bacteroidetes | Bacteroidia  | Bacteroidales | Bacteroidaceae | Bacteroides  | Bacteroides    |
| ASV1549    | Bacteria       | Bacteroidetes | Bacteroidia  | Bacteroidales | Bacteroidaceae | Bacteroidia  | Bacteroidia    |



|         |          |               |             |               |                |             |                         |
|---------|----------|---------------|-------------|---------------|----------------|-------------|-------------------------|
| ASV1607 | Bacteria | Bacteroidetes | Bacteroidia | Bacteroidales | Bacteroidaceae | Bacteroidia | Bacteroidia             |
| ASV434  | Bacteria | Bacteroidetes | Bacteroidia | Bacteroidales | Bacteroidaceae | Bacteroidia | Bacteroidia             |
| ASV967  | Bacteria | Bacteroidetes | Bacteroidia | Bacteroidales | Bacteroidaceae | Bacteroidia | Bacteroidia             |
| ASV28   | Bacteria | Bacteroidetes | Bacteroidia | Bacteroidales | Bacteroidaceae | Bacteroidia | Bacteroidia_sp._COT_040 |
| ASV1591 | Bacteria | Bacteroidetes | Bacteroidia | Bacteroidales | Bacteroidaceae | Bacteroidia | Bacteroidia             |
| ASV1666 | Bacteria | Bacteroidetes | Bacteroidia | Bacteroidales | Bacteroidaceae | Bacteroidia | Bacteroidia             |
| ASV202  | Bacteria | Bacteroidetes | Bacteroidia | Bacteroidales | Bacteroidaceae | Bacteroidia | Bacteroidia             |
| ASV1000 | Bacteria | Bacteroidetes | Bacteroidia | Bacteroidales | Bacteroidaceae | Bacteroidia | Bacteroidia             |
| ASV288  | Bacteria | Bacteroidetes | Bacteroidia | Bacteroidales | Bacteroidaceae | Bacteroidia | Bacteroidia             |
| ASV453  | Bacteria | Bacteroidetes | Bacteroidia | Bacteroidales | Bacteroidaceae | Bacteroidia | Bacteroidia             |
| ASV275  | Bacteria | Bacteroidetes | Bacteroidia | Bacteroidales | Bacteroidaceae | Bacteroidia | Bacteroidia             |
| ASV1346 | Bacteria | Bacteroidetes | Bacteroidia | Bacteroidales | Bacteroidaceae | Bacteroidia | Bacteroidia             |
| ASV633  | Bacteria | Bacteroidetes | Bacteroidia | Bacteroidales | Bacteroidaceae | Bacteroidia | Bacteroidia             |
| ASV665  | Bacteria | Bacteroidetes | Bacteroidia | Bacteroidales | Bacteroidaceae | Bacteroidia | Bacteroidia             |
| ASV1557 | Bacteria | Bacteroidetes | Bacteroidia | Bacteroidales | Bacteroidaceae | Bacteroides | Bacteroides             |
| ASV1017 | Bacteria | Bacteroidetes | Bacteroidia | Bacteroidales | Bacteroidaceae | Bacteroides | Bacteroides_plebeius    |
| ASV1692 | Bacteria | Bacteroidetes | Bacteroidia | Bacteroidales | Bacteroidaceae | Bacteroides | Bacteroides             |
| ASV1359 | Bacteria | Bacteroidetes | Bacteroidia | Bacteroidales | Bacteroidaceae | Bacteroides | Bacteroides_coprocola   |
| ASV686  | Bacteria | Bacteroidetes | Bacteroidia | Bacteroidales | Bacteroidaceae | Bacteroides | Bacteroides             |
| ASV1233 | Bacteria | Bacteroidetes | Bacteroidia | Bacteroidales | Bacteroidaceae | Bacteroides | Bacteroides             |
| ASV1650 | Bacteria | Bacteroidetes | Bacteroidia | Bacteroidales | Bacteroidaceae | Bacteroides | Bacteroides_vulgatus    |
| ASV1381 | Bacteria | Bacteroidetes | Bacteroidia | Bacteroidales | Bacteroidaceae | Bacteroides | Bacteroides             |
| ASV1651 | Bacteria | Bacteroidetes | Bacteroidia | Bacteroidales | Bacteroidaceae | Bacteroides | Bacteroides             |
| ASV1472 | Bacteria | Bacteroidetes | Bacteroidia | Bacteroidales | Bacteroidaceae | Bacteroides | Bacteroides_helcogenes  |
| ASV1377 | Bacteria | Bacteroidetes | Bacteroidia | Bacteroidales | Bacteroidaceae | Bacteroides | Bacteroides             |
| ASV1546 | Bacteria | Bacteroidetes | Bacteroidia | Bacteroidales | Bacteroidaceae | Bacteroides | Bacteroides             |
| ASV1271 | Bacteria | Bacteroidetes | Bacteroidia | Bacteroidales | Bacteroidaceae | Bacteroides | Bacteroides             |
| ASV882  | Bacteria | Bacteroidetes | Bacteroidia | Bacteroidales | Bacteroidaceae | Bacteroides | Bacteroides             |

|         |          |               |             |               |                    |                    |                               |
|---------|----------|---------------|-------------|---------------|--------------------|--------------------|-------------------------------|
| ASV730  | Bacteria | Bacteroidetes | Bacteroidia | Bacteroidales | Bacteroidaceae     | Bacteroides        | Bacteroides                   |
| ASV1460 | Bacteria | Bacteroidetes | Bacteroidia | Bacteroidales | Bacteroidaceae     | Bacteroides        | Bacteroides                   |
| ASV1635 | Bacteria | Bacteroidetes | Bacteroidia | Bacteroidales | Bacteroidaceae     | Bacteroides        | Bacteroides                   |
| ASV912  | Bacteria | Bacteroidetes | Bacteroidia | Bacteroidales | Bacteroidaceae     | Bacteroides        | Bacteroides                   |
| ASV1608 | Bacteria | Bacteroidetes | Bacteroidia | Bacteroidales | Bacteroidaceae     | Bacteroidaceae     | Bacteroidaceae                |
| ASV1565 | Bacteria | Bacteroidetes | Bacteroidia | Bacteroidales | Porphyromonadaceae | Porphyromonas      | Porphyromonas                 |
| ASV858  | Bacteria | Bacteroidetes | Bacteroidia | Bacteroidales | Porphyromonadaceae | Porphyromonadaceae | Porphyromonadaceae            |
| ASV1103 | Bacteria | Bacteroidetes | Bacteroidia | Bacteroidales | Porphyromonadaceae | Porphyromonadaceae | Porphyromonadaceae            |
| ASV1454 | Bacteria | Bacteroidetes | Bacteroidia | Bacteroidales | Porphyromonadaceae | Porphyromonas      | Porphyromonas                 |
| ASV1589 | Bacteria | Bacteroidetes | Bacteroidia | Bacteroidales | Porphyromonadaceae | Porphyromonas      | Porphyromonas                 |
| ASV1439 | Bacteria | Bacteroidetes | Bacteroidia | Bacteroidales | Porphyromonadaceae | Porphyromonas      | Porphyromonas                 |
| ASV1199 | Bacteria | Bacteroidetes | Bacteroidia | Bacteroidales | Porphyromonadaceae | Porphyromonas      | Porphyromonas                 |
| ASV1127 | Bacteria | Bacteroidetes | Bacteroidia | Bacteroidales | Porphyromonadaceae | Porphyromonas      | Porphyromonas                 |
| ASV972  | Bacteria | Bacteroidetes | Bacteroidia | Bacteroidales | Porphyromonadaceae | Porphyromonas      | Porphyromonas                 |
| ASV549  | Bacteria | Bacteroidetes | Bacteroidia | Bacteroidales | Porphyromonadaceae | Porphyromonas      | Porphyromonas                 |
| ASV1054 | Bacteria | Bacteroidetes | Bacteroidia | Bacteroidales | Porphyromonadaceae | Porphyromonas      | Porphyromonas                 |
| ASV1185 | Bacteria | Bacteroidetes | Bacteroidia | Bacteroidales | Porphyromonadaceae | Porphyromonas      | Porphyromonas                 |
| ASV1188 | Bacteria | Bacteroidetes | Bacteroidia | Bacteroidales | Porphyromonadaceae | Porphyromonas      | Porphyromonas                 |
| ASV306  | Bacteria | Bacteroidetes | Bacteroidia | Bacteroidales | Porphyromonadaceae | Porphyromonas      | Porphyromonas_sp._CO<br>T_366 |
| ASV932  | Bacteria | Bacteroidetes | Bacteroidia | Bacteroidales | Porphyromonadaceae | Porphyromonas      | Porphyromonas                 |
| ASV182  | Bacteria | Bacteroidetes | Bacteroidia | Bacteroidales | Porphyromonadaceae | Porphyromonas      | Porphyromonas                 |
| ASV287  | Bacteria | Bacteroidetes | Bacteroidia | Bacteroidales | Porphyromonadaceae | Porphyromonas      | Porphyromonas                 |
| ASV385  | Bacteria | Bacteroidetes | Bacteroidia | Bacteroidales | Porphyromonadaceae | Porphyromonas      | Porphyromonas                 |
| ASV290  | Bacteria | Bacteroidetes | Bacteroidia | Bacteroidales | Porphyromonadaceae | Porphyromonas      | Porphyromonas                 |
| ASV870  | Bacteria | Bacteroidetes | Bacteroidia | Bacteroidales | Porphyromonadaceae | Porphyromonas      | Porphyromonas                 |
| ASV1136 | Bacteria | Bacteroidetes | Bacteroidia | Bacteroidales | Porphyromonadaceae | Porphyromonas      | Porphyromonas                 |
| ASV472  | Bacteria | Bacteroidetes | Bacteroidia | Bacteroidales | Porphyromonadaceae | Porphyromonas      | Porphyromonas                 |



|         |          |               |             |                 |                     |                        |                                    |
|---------|----------|---------------|-------------|-----------------|---------------------|------------------------|------------------------------------|
| ASV245  | Bacteria | Bacteroidetes | Bacteroidia | Bacteroidales   | Porphyromonadaceae  | Proteiniphilum         | Proteiniphilum_sp._COT_385         |
| ASV1674 | Bacteria | Bacteroidetes | Bacteroidia | Bacteroidales   | Porphyromonadaceae  | Proteiniphilum         | Proteiniphilum                     |
| ASV1570 | Bacteria | Bacteroidetes | Bacteroidia | Bacteroidales   | Porphyromonadaceae  | Proteiniphilum         | Proteiniphilum                     |
| ASV833  | Bacteria | Bacteroidetes | Bacteroidia | Bacteroidales   | Porphyromonadaceae  | Petrimonas             | Petrimonas                         |
| ASV598  | Bacteria | Bacteroidetes | Bacteroidia | Bacteroidales   | Porphyromonadaceae  | Proteiniphilum         | Proteiniphilum                     |
| ASV374  | Bacteria | Bacteroidetes | Bacteroidia | Bacteroidia_O-1 | Bacteroidia_F-1     | Odoribacter            | Odoribacter                        |
| ASV732  | Bacteria | Bacteroidetes | Bacteroidia | Bacteroidia_O-1 | Bacteroidia_F-1     | Odoribacter            | Odoribacter                        |
| ASV607  | Bacteria | Bacteroidetes | Bacteroidia | Bacteroidia_O-1 | Bacteroidia_F-1     | Odoribacter            | Odoribacter_denticanis             |
| ASV596  | Bacteria | Bacteroidetes | Bacteroidia | Bacteroidia_O-1 | Bacteroidia_F-1     | Odoribacter            | Odoribacter                        |
| ASV620  | Bacteria | Bacteroidetes | Bacteroidia | Bacteroidia_O-1 | Bacteroidia_F-1     | Odoribacter            | Odoribacter                        |
| ASV333  | Bacteria | Bacteroidetes | Bacteroidia | Bacteroidales   | Porphyromonadaceae  | Paludibacter           | Paludibacter_sp._COT_384           |
| ASV1376 | Bacteria | Bacteroidetes | Bacteroidia | Bacteroidales   | Porphyromonadaceae  | Paludibacter           | Paludibacter                       |
| ASV1723 | Bacteria | Bacteroidetes | Bacteroidia | Bacteroidales   | Porphyromonadaceae  | Paludibacter           | Paludibacter                       |
| ASV238  | Bacteria | Bacteroidetes | Bacteroidia | Bacteroidales   | Porphyromonadaceae  | Paludibacter           | Paludibacter                       |
| ASV951  | Bacteria | Bacteroidetes | Bacteroidia | Bacteroidales   | Bacteroidales_[F-2] | Bacteroidales_[G-2]    | Bacteroidales_[G-2]                |
| ASV266  | Bacteria | Bacteroidetes | Bacteroidia | Bacteroidales   | Porphyromonadaceae  | Porphyromonadaceae_G-1 | Porphyromonadaceae_G-1_sp._COT_184 |
| ASV422  | Bacteria | Bacteroidetes | Bacteroidia | Bacteroidales   | Porphyromonadaceae  | Porphyromonadaceae_G-1 | Porphyromonadaceae_G-1             |
| ASV1244 | Bacteria | Bacteroidetes | Bacteroidia | Bacteroidales   | Porphyromonadaceae  | Porphyromonadaceae_G-1 | Porphyromonadaceae_G-1             |
| ASV264  | Bacteria | Bacteroidetes | Bacteroidia | Bacteroidales   | Porphyromonadaceae  | Paludibacter           | Paludibacter                       |
| ASV531  | Bacteria | Bacteroidetes | Bacteroidia | Bacteroidales   | Porphyromonadaceae  | Paludibacter           | Paludibacter                       |
| ASV1739 | Bacteria | Bacteroidetes | Bacteroidia | Bacteroidales   | Porphyromonadaceae  | Porphyromonas          | Porphyromonas                      |
| ASV1740 | Bacteria | Bacteroidetes | Bacteroidia | Bacteroidales   | Porphyromonadaceae  | Porphyromonas          | Porphyromonas                      |
| ASV75   | Bacteria | Bacteroidetes | Bacteroidia | Bacteroidales   | Porphyromonadaceae  | Porphyromonas          | Porphyromonas                      |
| ASV316  | Bacteria | Bacteroidetes | Bacteroidia | Bacteroidales   | Porphyromonadaceae  | Porphyromonas          | Porphyromonas                      |
| ASV1232 | Bacteria | Bacteroidetes | Bacteroidia | Bacteroidales   | Porphyromonadaceae  | Porphyromonas          | Porphyromonas                      |

|         |          |               |             |               |                    |                    |                       |
|---------|----------|---------------|-------------|---------------|--------------------|--------------------|-----------------------|
| ASV237  | Bacteria | Bacteroidetes | Bacteroidia | Bacteroidales | Porphyromonadaceae | Porphyromonas      | Porphyromonas         |
| ASV58   | Bacteria | Bacteroidetes | Bacteroidia | Bacteroidales | Porphyromonadaceae | Tannerella         | Tannerella            |
| ASV468  | Bacteria | Bacteroidetes | Bacteroidia | Bacteroidales | Porphyromonadaceae | Tannerella         | Tannerella            |
| ASV534  | Bacteria | Bacteroidetes | Bacteroidia | Bacteroidales | Porphyromonadaceae | Tannerella         | Tannerella            |
| ASV530  | Bacteria | Bacteroidetes | Bacteroidia | Bacteroidales | Porphyromonadaceae | Tannerella         | Tannerella            |
| ASV169  | Bacteria | Bacteroidetes | Bacteroidia | Bacteroidales | Porphyromonadaceae | Parabacteroides    | Parabacteroides       |
| ASV1527 | Bacteria | Bacteroidetes | Bacteroidia | Bacteroidales | Porphyromonadaceae | Parabacteroides    | Parabacteroides       |
| ASV148  | Bacteria | Bacteroidetes | Bacteroidia | Bacteroidales | Porphyromonadaceae | Porphyromonas      | Porphyromonas_macacae |
| ASV399  | Bacteria | Bacteroidetes | Bacteroidia | Bacteroidales | Porphyromonadaceae | Porphyromonas      | Porphyromonas_macacae |
| ASV18   | Bacteria | Bacteroidetes | Bacteroidia | Bacteroidales | Porphyromonadaceae | Porphyromonas      | Porphyromonas         |
| ASV693  | Bacteria | Bacteroidetes | Bacteroidia | Bacteroidales | Porphyromonadaceae | Porphyromonas      | Porphyromonas         |
| ASV11   | Bacteria | Bacteroidetes | Bacteroidia | Bacteroidales | Porphyromonadaceae | Porphyromonas      | Porphyromonas_canis   |
| ASV324  | Bacteria | Bacteroidetes | Bacteroidia | Bacteroidales | Porphyromonadaceae | Porphyromonas      | Porphyromonas         |
| ASV622  | Bacteria | Bacteroidetes | Bacteroidia | Bacteroidales | Porphyromonadaceae | Porphyromonas      | Porphyromonas         |
| ASV847  | Bacteria | Bacteroidetes | Bacteroidia | Bacteroidales | Porphyromonadaceae | Porphyromonas      | Porphyromonas         |
| ASV77   | Bacteria | Bacteroidetes | Bacteroidia | Bacteroidales | Porphyromonadaceae | Porphyromonas      | Porphyromonas         |
| ASV200  | Bacteria | Bacteroidetes | Bacteroidia | Bacteroidales | Porphyromonadaceae | Porphyromonas      | Porphyromonas         |
| ASV947  | Bacteria | Bacteroidetes | Bacteroidia | Bacteroidales | Porphyromonadaceae | Porphyromonas      | Porphyromonas         |
| ASV1204 | Bacteria | Bacteroidetes | Bacteroidia | Bacteroidales | Porphyromonadaceae | Porphyromonadaceae | Porphyromonadaceae    |
| ASV332  | Bacteria | Bacteroidetes | Bacteroidia | Bacteroidales | Porphyromonadaceae | Porphyromonas      | Porphyromonas         |
| ASV654  | Bacteria | Bacteroidetes | Bacteroidia | Bacteroidales | Porphyromonadaceae | Porphyromonadaceae | Porphyromonadaceae    |
| ASV4    | Bacteria | Bacteroidetes | Bacteroidia | Bacteroidales | Porphyromonadaceae | Porphyromonas      | Porphyromonas         |
| ASV876  | Bacteria | Bacteroidetes | Bacteroidia | Bacteroidales | Porphyromonadaceae | Porphyromonas      | Porphyromonas         |
| ASV591  | Bacteria | Bacteroidetes | Bacteroidia | Bacteroidales | Porphyromonadaceae | Porphyromonas      | Porphyromonas         |
| ASV1129 | Bacteria | Bacteroidetes | Bacteroidia | Bacteroidales | Porphyromonadaceae | Porphyromonas      | Porphyromonas         |
| ASV465  | Bacteria | Bacteroidetes | Bacteroidia | Bacteroidales | Porphyromonadaceae | Porphyromonas      | Porphyromonas         |
| ASV1062 | Bacteria | Bacteroidetes | Bacteroidia | Bacteroidales | Porphyromonadaceae | Porphyromonas      | Porphyromonas         |

|         |          |               |             |               |                    |                    |                                 |
|---------|----------|---------------|-------------|---------------|--------------------|--------------------|---------------------------------|
| ASV6    | Bacteria | Bacteroidetes | Bacteroidia | Bacteroidales | Porphyromonadaceae | Porphyromonas      | Porphyromonas_cangingi<br>valis |
| ASV1668 | Bacteria | Bacteroidetes | Bacteroidia | Bacteroidales | Porphyromonadaceae | Porphyromonas      | Porphyromonas                   |
| ASV1588 | Bacteria | Bacteroidetes | Bacteroidia | Bacteroidales | Porphyromonadaceae | Porphyromonas      | Porphyromonas                   |
| ASV1647 | Bacteria | Bacteroidetes | Bacteroidia | Bacteroidales | Porphyromonadaceae | Porphyromonas      | Porphyromonas                   |
| ASV1299 | Bacteria | Bacteroidetes | Bacteroidia | Bacteroidales | Porphyromonadaceae | Porphyromonadaceae | Porphyromonadaceae              |
| ASV1405 | Bacteria | Bacteroidetes | Bacteroidia | Bacteroidales | Porphyromonadaceae | Porphyromonas      | Porphyromonas                   |
| ASV1582 | Bacteria | Bacteroidetes | Bacteroidia | Bacteroidales | Porphyromonadaceae | Porphyromonas      | Porphyromonas                   |
| ASV302  | Bacteria | Bacteroidetes | Bacteroidia | Bacteroidales | Porphyromonadaceae | Porphyromonas      | Porphyromonas                   |
| ASV1431 | Bacteria | Bacteroidetes | Bacteroidia | Bacteroidales | Porphyromonadaceae | Porphyromonas      | Porphyromonas                   |
| ASV528  | Bacteria | Bacteroidetes | Bacteroidia | Bacteroidales | Porphyromonadaceae | Porphyromonas      | Porphyromonas                   |
| ASV41   | Bacteria | Bacteroidetes | Bacteroidia | Bacteroidales | Porphyromonadaceae | Porphyromonas      | Porphyromonas_canoris           |
| ASV632  | Bacteria | Bacteroidetes | Bacteroidia | Bacteroidales | Porphyromonadaceae | Porphyromonas      | Porphyromonas                   |
| ASV841  | Bacteria | Bacteroidetes | Bacteroidia | Bacteroidales | Porphyromonadaceae | Porphyromonas      | Porphyromonas                   |
| ASV788  | Bacteria | Bacteroidetes | Bacteroidia | Bacteroidales | Porphyromonadaceae | Porphyromonas      | Porphyromonas                   |
| ASV5    | Bacteria | Bacteroidetes | Bacteroidia | Bacteroidales | Porphyromonadaceae | Porphyromonas      | Porphyromonas                   |
| ASV866  | Bacteria | Bacteroidetes | Bacteroidia | Bacteroidales | Porphyromonadaceae | Porphyromonas      | Porphyromonas                   |
| ASV1620 | Bacteria | Bacteroidetes | Bacteroidia | Bacteroidales | Porphyromonadaceae | Porphyromonas      | Porphyromonas                   |
| ASV1716 | Bacteria | Bacteroidetes | Bacteroidia | Bacteroidales | Porphyromonadaceae | Porphyromonas      | Porphyromonas                   |
| ASV1691 | Bacteria | Bacteroidetes | Bacteroidia | Bacteroidales | Bacteroidales      | Bacteroidales      | Bacteroidales                   |
| ASV835  | Bacteria | Bacteroidetes | Bacteroidia | Bacteroidales | Prevotellaceae     | Prevotella         | Prevotella                      |
| ASV1106 | Bacteria | Bacteroidetes | Bacteroidia | Bacteroidales | Prevotellaceae     | Prevotella         | Prevotella                      |
| ASV702  | Bacteria | Bacteroidetes | Bacteroidia | Bacteroidales | Prevotellaceae     | Prevotella         | Prevotella_intermedia           |
| ASV295  | Bacteria | Bacteroidetes | Bacteroidia | Bacteroidales | Prevotellaceae     | Prevotella         | Prevotella_intermedia           |
| ASV1268 | Bacteria | Bacteroidetes | Bacteroidia | Bacteroidales | Prevotellaceae     | Prevotella         | Prevotella                      |
| ASV1334 | Bacteria | Bacteroidetes | Bacteroidia | Bacteroidales | Prevotellaceae     | Prevotella         | Prevotella                      |
| ASV498  | Bacteria | Bacteroidetes | Bacteroidia | Bacteroidales | Prevotellaceae     | Prevotella         | Prevotella                      |
| ASV582  | Bacteria | Bacteroidetes | Bacteroidia | Bacteroidales | Prevotellaceae     | Prevotella         | Prevotella_intermedia           |

|         |          |               |             |               |                |                |                        |
|---------|----------|---------------|-------------|---------------|----------------|----------------|------------------------|
| ASV1068 | Bacteria | Bacteroidetes | Bacteroidia | Bacteroidales | Prevotellaceae | Prevotella     | Prevotella             |
| ASV1438 | Bacteria | Bacteroidetes | Bacteroidia | Bacteroidales | Prevotellaceae | Prevotella     | Prevotella             |
| ASV377  | Bacteria | Bacteroidetes | Bacteroidia | Bacteroidales | Prevotellaceae | Prevotella     | Prevotella_sp._HMT_304 |
| ASV968  | Bacteria | Bacteroidetes | Bacteroidia | Bacteroidales | Prevotellaceae | Prevotella     | Prevotella             |
| ASV852  | Bacteria | Bacteroidetes | Bacteroidia | Bacteroidales | Prevotellaceae | Prevotella     | Prevotella             |
| ASV137  | Bacteria | Bacteroidetes | Bacteroidia | Bacteroidales | Prevotellaceae | Prevotella     | Prevotella             |
| ASV488  | Bacteria | Bacteroidetes | Bacteroidia | Bacteroidales | Prevotellaceae | Prevotella     | Prevotella             |
| ASV741  | Bacteria | Bacteroidetes | Bacteroidia | Bacteroidales | Prevotellaceae | Prevotella     | Prevotella             |
| ASV653  | Bacteria | Bacteroidetes | Bacteroidia | Bacteroidales | Prevotellaceae | Prevotella     | Prevotella             |
| ASV136  | Bacteria | Bacteroidetes | Bacteroidia | Bacteroidales | Prevotellaceae | Prevotella     | Prevotella_sp._COT_195 |
| ASV551  | Bacteria | Bacteroidetes | Bacteroidia | Bacteroidales | Prevotellaceae | Prevotella     | Prevotella             |
| ASV1732 | Bacteria | Bacteroidetes | Bacteroidia | Bacteroidales | Prevotellaceae | Prevotella     | Prevotella             |
| ASV1314 | Bacteria | Bacteroidetes | Bacteroidia | Bacteroidales | Prevotellaceae | Prevotella     | Prevotella             |
| ASV1419 | Bacteria | Bacteroidetes | Bacteroidia | Bacteroidales | Prevotellaceae | Prevotella     | Prevotella             |
| ASV561  | Bacteria | Bacteroidetes | Bacteroidia | Bacteroidales | Prevotellaceae | Prevotella     | Prevotella             |
| ASV1285 | Bacteria | Bacteroidetes | Bacteroidia | Bacteroidales | Prevotellaceae | Prevotella     | Prevotella             |
| ASV1029 | Bacteria | Bacteroidetes | Bacteroidia | Bacteroidales | Prevotellaceae | Prevotella     | Prevotella             |
| ASV990  | Bacteria | Bacteroidetes | Bacteroidia | Bacteroidales | Prevotellaceae | Prevotella     | Prevotella             |
| ASV480  | Bacteria | Bacteroidetes | Bacteroidia | Bacteroidales | Prevotellaceae | Prevotella     | Prevotella             |
| ASV744  | Bacteria | Bacteroidetes | Bacteroidia | Bacteroidales | Prevotellaceae | Prevotella     | Prevotella             |
| ASV868  | Bacteria | Bacteroidetes | Bacteroidia | Bacteroidales | Prevotellaceae | Prevotella     | Prevotella             |
| ASV1139 | Bacteria | Bacteroidetes | Bacteroidia | Bacteroidales | Prevotellaceae | Prevotella     | Prevotella             |
| ASV992  | Bacteria | Bacteroidetes | Bacteroidia | Bacteroidales | Prevotellaceae | Paraprevotella | Paraprevotella         |
| ASV993  | Bacteria | Bacteroidetes | Bacteroidia | Bacteroidales | Prevotellaceae | Paraprevotella | Paraprevotella         |
| ASV1298 | Bacteria | Bacteroidetes | Bacteroidia | Bacteroidales | Prevotellaceae | Paraprevotella | Paraprevotella         |
| ASV1173 | Bacteria | Bacteroidetes | Bacteroidia | Bacteroidales | Prevotellaceae | Paraprevotella | Paraprevotella         |
| ASV680  | Bacteria | Bacteroidetes | Bacteroidia | Bacteroidales | Prevotellaceae | Paraprevotella | Paraprevotella         |
| ASV1537 | Bacteria | Bacteroidetes | Bacteroidia | Bacteroidales | Prevotellaceae | Paraprevotella | Paraprevotella         |
| ASV300  | Bacteria | Bacteroidetes | Bacteroidia | Bacteroidales | Prevotellaceae | Paraprevotella | Paraprevotella         |

|         |          |               |             |               |                |                |                            |
|---------|----------|---------------|-------------|---------------|----------------|----------------|----------------------------|
| ASV1115 | Bacteria | Bacteroidetes | Bacteroidia | Bacteroidales | Prevotellaceae | Paraprevotella | Paraprevotella             |
| ASV198  | Bacteria | Bacteroidetes | Bacteroidia | Bacteroidales | Prevotellaceae | Paraprevotella | Paraprevotella             |
| ASV1085 | Bacteria | Bacteroidetes | Bacteroidia | Bacteroidales | Prevotellaceae | Paraprevotella | Paraprevotella             |
| ASV934  | Bacteria | Bacteroidetes | Bacteroidia | Bacteroidales | Prevotellaceae | Paraprevotella | Paraprevotella             |
| ASV1168 | Bacteria | Bacteroidetes | Bacteroidia | Bacteroidales | Prevotellaceae | Paraprevotella | Paraprevotella             |
| ASV1331 | Bacteria | Bacteroidetes | Bacteroidia | Bacteroidales | Prevotellaceae | Paraprevotella | Paraprevotella             |
| ASV489  | Bacteria | Bacteroidetes | Bacteroidia | Bacteroidales | Prevotellaceae | Paraprevotella | Paraprevotella             |
| ASV903  | Bacteria | Bacteroidetes | Bacteroidia | Bacteroidales | Prevotellaceae | Paraprevotella | Paraprevotella             |
| ASV391  | Bacteria | Bacteroidetes | Bacteroidia | Bacteroidales | Prevotellaceae | Prevotellaceae | Prevotellaceae             |
| ASV909  | Bacteria | Bacteroidetes | Bacteroidia | Bacteroidales | Prevotellaceae | Paraprevotella | Paraprevotella             |
| ASV571  | Bacteria | Bacteroidetes | Bacteroidia | Bacteroidales | Prevotellaceae | Paraprevotella | Paraprevotella             |
| ASV803  | Bacteria | Bacteroidetes | Bacteroidia | Bacteroidales | Prevotellaceae | Paraprevotella | Paraprevotella             |
| ASV1733 | Bacteria | Bacteroidetes | Bacteroidia | Bacteroidales | Prevotellaceae | Paraprevotella | Paraprevotella_xylaniphila |
| ASV271  | Bacteria | Bacteroidetes | Bacteroidia | Bacteroidales | Prevotellaceae | Prevotella     | Prevotella_sp._COT_372     |
| ASV545  | Bacteria | Bacteroidetes | Bacteroidia | Bacteroidales | Prevotellaceae | Prevotella     | Prevotella                 |
| ASV621  | Bacteria | Bacteroidetes | Bacteroidia | Bacteroidales | Prevotellaceae | Prevotella     | Prevotella                 |
| ASV129  | Bacteria | Bacteroidetes | Bacteroidia | Bacteroidales | Prevotellaceae | Prevotella     | Prevotella                 |
| ASV1018 | Bacteria | Bacteroidetes | Bacteroidia | Bacteroidales | Prevotellaceae | Paraprevotella | Paraprevotella             |
| ASV1735 | Bacteria | Bacteroidetes | Bacteroidia | Bacteroidales | Prevotellaceae | Paraprevotella | Paraprevotella             |
| ASV723  | Bacteria | Bacteroidetes | Bacteroidia | Bacteroidales | Prevotellaceae | Alloprevotella | Alloprevotella             |
| ASV944  | Bacteria | Bacteroidetes | Bacteroidia | Bacteroidales | Prevotellaceae | Alloprevotella | Alloprevotella             |
| ASV90   | Bacteria | Bacteroidetes | Bacteroidia | Bacteroidales | Prevotellaceae | Alloprevotella | Alloprevotella             |
| ASV671  | Bacteria | Bacteroidetes | Bacteroidia | Bacteroidales | Prevotellaceae | Alloprevotella | Alloprevotella             |
| ASV98   | Bacteria | Bacteroidetes | Bacteroidia | Bacteroidales | Prevotellaceae | Alloprevotella | Alloprevotella             |
| ASV1087 | Bacteria | Bacteroidetes | Bacteroidia | Bacteroidales | Prevotellaceae | Alloprevotella | Alloprevotella             |
| ASV722  | Bacteria | Bacteroidetes | Bacteroidia | Bacteroidales | Prevotellaceae | Alloprevotella | Alloprevotella             |
| ASV372  | Bacteria | Bacteroidetes | Bacteroidia | Bacteroidales | Prevotellaceae | Alloprevotella | Alloprevotella             |
| ASV1337 | Bacteria | Bacteroidetes | Bacteroidia | Bacteroidales | Prevotellaceae | Alloprevotella | Alloprevotella             |





|         |          |               |                         |                     |                     |                     |                             |
|---------|----------|---------------|-------------------------|---------------------|---------------------|---------------------|-----------------------------|
| ASV820  | Bacteria | Bacteroidetes | Bacteroidia             | Bacteroidales       | Porphyromonadaceae  | Barnesiella         | Barnesiella                 |
| ASV1410 | Bacteria | Bacteroidetes | Bacteroidetes<br>_[C-1] | Bacteroidetes_[O-1] | Bacteroidetes_[F-1] | Bacteroidetes_[G-7] | Bacteroidetes_[G-7]         |
| ASV152  | Bacteria | Bacteroidetes | Bacteroidia             | Bacteroidia_O-1     | Bacteroidia_F-2     | Bacteroidia_G-2     | Bacteroidia_G-2_sp._COT_301 |
| ASV188  | Bacteria | Bacteroidetes | Bacteroidia             | Bacteroidales       | Bacteroidales       | Bacteroidales       | Bacteroidales               |
| ASV611  | Bacteria | Bacteroidetes | Bacteroidetes           | Bacteroidetes       | Bacteroidetes       | Bacteroidetes       | Bacteroidetes               |
| ASV1037 | Bacteria | Bacteroidetes | Bacteroidia             | Bacteroidales       | Porphyromonadaceae  | Porphyromonadaceae  | Porphyromonadaceae          |
| ASV363  | Bacteria | Bacteroidetes | Bacteroidetes           | Bacteroidetes       | Bacteroidetes       | Bacteroidetes       | Bacteroidetes               |
| ASV808  | Bacteria | Bacteroidetes | Bacteroidetes           | Bacteroidetes       | Bacteroidetes       | Bacteroidetes       | Bacteroidetes               |
| ASV1562 | Bacteria | Bacteroidetes | Bacteroidia             | Bacteroidales       | Porphyromonadaceae  | Porphyromonadaceae  | Porphyromonadaceae          |
| ASV1722 | Bacteria | Bacteroidetes | Bacteroidetes<br>_[C-1] | Bacteroidetes_[O-1] | Bacteroidetes_[F-1] | Bacteroidetes_[G-3] | Bacteroidetes_[G-3]         |
| ASV1119 | Bacteria | Bacteroidetes | Bacteroidia             | Bacteroidia_O-2     | Bacteroidia_F-3     | Bacteroidia_G-3     | Bacteroidia_G-3             |
| ASV1164 | Bacteria | Bacteroidetes | Bacteroidia             | Bacteroidia_O-2     | Bacteroidia_F-3     | Bacteroidia_G-3     | Bacteroidia_G-3             |
| ASV1409 | Bacteria | Bacteroidetes | Bacteroidetes<br>_[C-1] | Bacteroidetes_[O-1] | Bacteroidetes_[F-1] | Bacteroidetes_[G-3] | Bacteroidetes_[G-3]         |
| ASV1681 | Bacteria | Bacteroidetes | Bacteroidetes<br>_[C-1] | Bacteroidetes_[O-1] | Bacteroidetes_[F-1] | Bacteroidetes_[G-3] | Bacteroidetes_[G-3]         |
| ASV1633 | Bacteria | Bacteroidetes | Bacteroidetes<br>_[C-1] | Bacteroidetes_[O-1] | Bacteroidetes_[F-1] | Bacteroidetes_[G-3] | Bacteroidetes_[G-3]         |
| ASV106  | Bacteria | Bacteroidetes | Bacteroidia             | Bacteroidia_O-2     | Bacteroidia_F-4     | Bacteroidia_G-4     | Bacteroidia_G-4_sp._COT_387 |
| ASV526  | Bacteria | Bacteroidetes | Bacteroidia             | Bacteroidia_O-2     | Bacteroidia_F-4     | Bacteroidia_G-4     | Bacteroidia_G-4             |
| ASV1392 | Bacteria | Bacteroidetes | Bacteroidetes<br>_[C-1] | Bacteroidetes_[O-1] | Bacteroidetes_[F-1] | Bacteroidetes_[G-3] | Bacteroidetes_[G-3]         |
| ASV981  | Bacteria | Bacteroidetes | Bacteroidia             | Bacteroidia         | Bacteroidia         | Bacteroidia         | Bacteroidia                 |
| ASV1641 | Bacteria | Bacteroidetes | Bacteroidetes<br>_[C-1] | Bacteroidetes_[O-1] | Bacteroidetes_[F-1] | Bacteroidetes_[G-3] | Bacteroidetes_[G-3]         |
| ASV1528 | Bacteria | Bacteroidetes | Bacteroidia             | Bacteroidales       | Bacteroidales       | Bacteroidales       | Bacteroidales               |

|         |          |                        |                  |                    |                    |                    |                             |
|---------|----------|------------------------|------------------|--------------------|--------------------|--------------------|-----------------------------|
| ASV1575 | Bacteria | Bacteroidetes          | Flavobacteriia   | Flavobacteriales   | Flavobacteriaceae  | Flavobacteriaceae  | Flavobacteriaceae           |
| ASV66   | Bacteria | Bacteroidetes          | Bacteroidia      | Bacteroidia_O-2    | Bacteroidia_F-5    | Bacteroidia_G-5    | Bacteroidia_G-5             |
| ASV1658 | Bacteria | Bacteroidetes          | Bacteroidia      | Bacteroidales      | Porphyromonadaceae | Porphyromonadaceae | Porphyromonadaceae          |
| ASV1704 | Bacteria | Gracilibacteria (GN02) | GN02_C-1         | GN02_O-1           | GN02_F-1           | GN02_G-2           | GN02_G-2                    |
| ASV1506 | Bacteria | Bacteroidetes          | Bacteroidia      | Bacteroidales      | Porphyromonadaceae | Porphyromonadaceae | Porphyromonadaceae          |
| ASV1034 | Bacteria | Bacteroidetes          | Bacteroidetes    | Bacteroidetes      | Bacteroidetes      | Bacteroidetes      | Bacteroidetes               |
| ASV1101 | Bacteria | Bacteroidetes          | Bacteroidetes    | Bacteroidetes      | Bacteroidetes      | Bacteroidetes      | Bacteroidetes               |
| ASV1399 | Bacteria | Bacteroidetes          | Bacteroidetes    | Bacteroidetes      | Bacteroidetes      | Bacteroidetes      | Bacteroidetes               |
| ASV461  | Bacteria | Bacteroidetes          | Bacteroidetes    | Bacteroidetes      | Bacteroidetes      | Bacteroidetes      | Bacteroidetes               |
| ASV1067 | Bacteria | Bacteroidetes          | Bacteroidetes    | Bacteroidetes      | Bacteroidetes      | Bacteroidetes      | Bacteroidetes               |
| ASV778  | Bacteria | Bacteroidetes          | Bacteroidetes    | Bacteroidetes      | Bacteroidetes      | Bacteroidetes      | Bacteroidetes               |
| ASV1147 | Bacteria | Bacteroidetes          | Bacteroidetes    | Bacteroidetes      | Bacteroidetes      | Bacteroidetes      | Bacteroidetes               |
| ASV1158 | Bacteria | Bacteroidetes          | Sphingobacteriia | Sphingobacteriales | Chitinophagaceae   | Sediminibacterium  | Sediminibacterium_salmoneum |
| ASV14   | Bacteria | Bacteroidetes          | Flavobacteriia   | Flavobacteriales   | Flavobacteriaceae  | Bergeyella         | Bergeyella_zoohelcum        |
| ASV56   | Bacteria | Bacteroidetes          | Flavobacteriia   | Flavobacteriales   | Flavobacteriaceae  | Bergeyella         | Bergeyella                  |
| ASV1045 | Bacteria | Bacteroidetes          | Flavobacteriia   | Flavobacteriales   | Flavobacteriaceae  | Bergeyella         | Bergeyella                  |
| ASV44   | Bacteria | Bacteroidetes          | Flavobacteriia   | Flavobacteriales   | Flavobacteriaceae  | Bergeyella         | Bergeyella                  |
| ASV1093 | Bacteria | Bacteroidetes          | Flavobacteriia   | Flavobacteriales   | Flavobacteriaceae  | Bergeyella         | Bergeyella                  |
| ASV1325 | Bacteria | Bacteroidetes          | Flavobacteriia   | Flavobacteriales   | Flavobacteriaceae  | Cloacibacterium    | Cloacibacterium             |
| ASV464  | Bacteria | Bacteroidetes          | Flavobacteriia   | Flavobacteriales   | Flavobacteriaceae  | Cloacibacterium    | Cloacibacterium             |

|         |          |               |                    |                  |                   |                   |                                 |
|---------|----------|---------------|--------------------|------------------|-------------------|-------------------|---------------------------------|
| ASV353  | Bacteria | Bacteroidetes | Flavobacterii<br>a | Flavobacteriales | Flavobacteriaceae | Cloacibacterium   | Cloacibacterium_sp._CO<br>T_320 |
| ASV1352 | Bacteria | Bacteroidetes | Flavobacterii<br>a | Flavobacteriales | Flavobacteriaceae | Cloacibacterium   | Cloacibacterium                 |
| ASV1412 | Bacteria | Bacteroidetes | Flavobacterii<br>a | Flavobacteriales | Flavobacteriaceae | Bergeyella        | Bergeyella                      |
| ASV1473 | Bacteria | Bacteroidetes | Flavobacterii<br>a | Flavobacteriales | Flavobacteriaceae | Bergeyella        | Bergeyella                      |
| ASV1600 | Bacteria | Bacteroidetes | Flavobacterii<br>a | Flavobacteriales | Flavobacteriaceae | Bergeyella        | Bergeyella                      |
| ASV1601 | Bacteria | Bacteroidetes | Flavobacterii<br>a | Flavobacteriales | Flavobacteriaceae | Bergeyella        | Bergeyella                      |
| ASV1712 | Bacteria | Fusobacteria  | Fusobacteriia      | Fusobacteriales  | Fusobacteriaceae  | Fusobacteriaceae  | Fusobacteriaceae                |
| ASV1573 | Bacteria | Bacteroidetes | Flavobacterii<br>a | Flavobacteriales | Flavobacteriaceae | Flavobacteriaceae | Flavobacteriaceae               |
| ASV985  | Bacteria | Bacteroidetes | Flavobacterii<br>a | Flavobacteriales | Flavobacteriaceae | Flavobacteriaceae | Flavobacteriaceae               |
| ASV1363 | Bacteria | Bacteroidetes | Flavobacterii<br>a | Flavobacteriales | Flavobacteriaceae | Capnocytophaga    | Capnocytophaga                  |
| ASV895  | Bacteria | Bacteroidetes | Flavobacterii<br>a | Flavobacteriales | Flavobacteriaceae | Flavobacteriaceae | Flavobacteriaceae               |
| ASV1080 | Bacteria | Bacteroidetes | Flavobacterii<br>a | Flavobacteriales | Flavobacteriaceae | Capnocytophaga    | Capnocytophaga                  |
| ASV1645 | Bacteria | Bacteroidetes | Flavobacterii<br>a | Flavobacteriales | Flavobacteriaceae | Capnocytophaga    | Capnocytophaga                  |
| ASV501  | Bacteria | Bacteroidetes | Flavobacterii<br>a | Flavobacteriales | Flavobacteriaceae | Capnocytophaga    | Capnocytophaga                  |
| ASV825  | Bacteria | Bacteroidetes | Flavobacterii<br>a | Flavobacteriales | Flavobacteriaceae | Capnocytophaga    | Capnocytophaga_sp._CO<br>T_329  |
| ASV1300 | Bacteria | Bacteroidetes | Flavobacterii<br>a | Flavobacteriales | Flavobacteriaceae | Capnocytophaga    | Capnocytophaga                  |
| ASV717  | Bacteria | Bacteroidetes | Flavobacterii<br>a | Flavobacteriales | Flavobacteriaceae | Bergeyella        | Bergeyella                      |

|         |          |               |                    |                  |                   |                   |                                |
|---------|----------|---------------|--------------------|------------------|-------------------|-------------------|--------------------------------|
| ASV1109 | Bacteria | Bacteroidetes | Flavobacterii<br>a | Flavobacteriales | Flavobacteriaceae | Bergeyella        | Bergeyella                     |
| ASV27   | Bacteria | Bacteroidetes | Flavobacterii<br>a | Flavobacteriales | Flavobacteriaceae | Capnocytophaga    | Capnocytophaga_sp._CO<br>T_339 |
| ASV427  | Bacteria | Bacteroidetes | Flavobacterii<br>a | Flavobacteriales | Flavobacteriaceae | Flavobacteriaceae | Flavobacteriaceae              |
| ASV726  | Bacteria | Bacteroidetes | Flavobacterii<br>a | Flavobacteriales | Flavobacteriaceae | Flavobacteriaceae | Flavobacteriaceae              |
| ASV1480 | Bacteria | Bacteroidetes | Flavobacterii<br>a | Flavobacteriales | Flavobacteriaceae | Capnocytophaga    | Capnocytophaga                 |
| ASV746  | Bacteria | Bacteroidetes | Flavobacterii<br>a | Flavobacteriales | Flavobacteriaceae | Capnocytophaga    | Capnocytophaga                 |
| ASV493  | Bacteria | Bacteroidetes | Flavobacterii<br>a | Flavobacteriales | Flavobacteriaceae | Capnocytophaga    | Capnocytophaga                 |
| ASV962  | Bacteria | Bacteroidetes | Flavobacterii<br>a | Flavobacteriales | Flavobacteriaceae | Capnocytophaga    | Capnocytophaga_canimo<br>rsus  |
| ASV219  | Bacteria | Bacteroidetes | Flavobacterii<br>a | Flavobacteriales | Flavobacteriaceae | Capnocytophaga    | Capnocytophaga_canimo<br>rsus  |
| ASV773  | Bacteria | Bacteroidetes | Flavobacterii<br>a | Flavobacteriales | Flavobacteriaceae | Capnocytophaga    | Capnocytophaga                 |
| ASV779  | Bacteria | Bacteroidetes | Flavobacterii<br>a | Flavobacteriales | Flavobacteriaceae | Capnocytophaga    | Capnocytophaga_canimo<br>rsus  |
| ASV892  | Bacteria | Bacteroidetes | Flavobacterii<br>a | Flavobacteriales | Flavobacteriaceae | Capnocytophaga    | Capnocytophaga                 |
| ASV647  | Bacteria | Bacteroidetes | Flavobacterii<br>a | Flavobacteriales | Flavobacteriaceae | Capnocytophaga    | Capnocytophaga                 |
| ASV119  | Bacteria | Bacteroidetes | Flavobacterii<br>a | Flavobacteriales | Flavobacteriaceae | Capnocytophaga    | Capnocytophaga                 |
| ASV356  | Bacteria | Bacteroidetes | Flavobacterii<br>a | Flavobacteriales | Flavobacteriaceae | Capnocytophaga    | Capnocytophaga                 |
| ASV278  | Bacteria | Bacteroidetes | Flavobacterii<br>a | Flavobacteriales | Flavobacteriaceae | Capnocytophaga    | Capnocytophaga_cynode<br>gmi   |
| ASV644  | Bacteria | Bacteroidetes | Flavobacterii<br>a | Flavobacteriales | Flavobacteriaceae | Capnocytophaga    | Capnocytophaga                 |

|         |          |               |                    |                  |                    |                    |                              |
|---------|----------|---------------|--------------------|------------------|--------------------|--------------------|------------------------------|
| ASV1524 | Bacteria | Bacteroidetes | Flavobacterii<br>a | Flavobacteriales | Flavobacteriaceae  | Capnocytophaga     | Capnocytophaga               |
| ASV898  | Bacteria | Bacteroidetes | Flavobacterii<br>a | Flavobacteriales | Flavobacteriaceae  | Capnocytophaga     | Capnocytophaga               |
| ASV1153 | Bacteria | Bacteroidetes | Flavobacterii<br>a | Flavobacteriales | Flavobacteriaceae  | Capnocytophaga     | Capnocytophaga               |
| ASV232  | Bacteria | Bacteroidetes | Flavobacterii<br>a | Flavobacteriales | Flavobacteriaceae  | Capnocytophaga     | Capnocytophaga_cynode<br>gmi |
| ASV257  | Bacteria | Bacteroidetes | Flavobacterii<br>a | Flavobacteriales | Flavobacteriaceae  | Capnocytophaga     | Capnocytophaga_cynode<br>gmi |
| ASV937  | Bacteria | Bacteroidetes | Flavobacterii<br>a | Flavobacteriales | Flavobacteriaceae  | Capnocytophaga     | Capnocytophaga               |
| ASV504  | Bacteria | Bacteroidetes | Flavobacterii<br>a | Flavobacteriales | Flavobacteriaceae  | Capnocytophaga     | Capnocytophaga               |
| ASV513  | Bacteria | Bacteroidetes | Flavobacterii<br>a | Flavobacteriales | Flavobacteriaceae  | Capnocytophaga     | Capnocytophaga               |
| ASV94   | Bacteria | Bacteroidetes | Flavobacterii<br>a | Flavobacteriales | Flavobacteriaceae  | Capnocytophaga     | Capnocytophaga               |
| ASV433  | Bacteria | Bacteroidetes | Flavobacterii<br>a | Flavobacteriales | Flavobacteriaceae  | Capnocytophaga     | Capnocytophaga               |
| ASV698  | Bacteria | Bacteroidetes | Flavobacterii<br>a | Flavobacteriales | Flavobacteriaceae  | Capnocytophaga     | Capnocytophaga               |
| ASV764  | Bacteria | Bacteroidetes | Flavobacterii<br>a | Flavobacteriales | Flavobacteriaceae  | Capnocytophaga     | Capnocytophaga               |
| ASV1731 | Bacteria | Bacteria      | Bacteria           | Bacteria         | Bacteria           | Bacteria           | Bacteria                     |
| ASV1583 | Bacteria | Bacteroidetes | Bacteroidia        | Bacteroidales    | Prevotellaceae     | Alloprevotella     | Alloprevotella               |
| ASV1686 | Bacteria | Bacteroidetes | Bacteroidia        | Bacteroidales    | Prevotellaceae     | Alloprevotella     | Alloprevotella               |
| ASV1745 | Bacteria | Bacteroidetes | Bacteroidia        | Bacteroidales    | Porphyromonadaceae | Porphyromonadaceae | Porphyromonadaceae           |
| ASV1747 | Bacteria | Bacteroidetes | Bacteroidia        | Bacteroidales    | Porphyromonadaceae | Porphyromonas      | Porphyromonas                |
| ASV1677 | Bacteria | Bacteroidetes | Bacteroidia        | Bacteroidales    | Porphyromonadaceae | Porphyromonadaceae | Porphyromonadaceae           |
| ASV1755 | Bacteria | Bacteroidetes | Bacteroidia        | Bacteroidales    | Bacteroidales      | Bacteroidales      | Bacteroidales                |

|         |          |               |             |               |                    |                       |                       |
|---------|----------|---------------|-------------|---------------|--------------------|-----------------------|-----------------------|
| ASV1422 | Bacteria | Firmicutes    | Clostridia  | Clostridiales | Clostridiales      | Clostridiales         | Clostridiales         |
| ASV1726 | Bacteria | Firmicutes    | Clostridia  | Clostridiales | Lachnospiraceae    | Catonella             | Catonella             |
| ASV1696 | Bacteria | Bacteroidetes | Bacteroidia | Bacteroidales | Porphyromonadaceae | Porphyromonadaceae    | Porphyromonadaceae    |
| ASV1629 | Bacteria | Firmicutes    | Clostridia  | Clostridiales | Clostridiales_F-2  | Clostridiales_F-2,G-1 | Clostridiales_F-2,G-1 |
| ASV1753 | Bacteria | Bacteroidetes | Bacteroidia | Bacteroidales | Porphyromonadaceae | Porphyromonadaceae    | Porphyromonadaceae    |
| ASV1717 | Bacteria | Bacteroidetes | Bacteroidia | Bacteroidales | Porphyromonadaceae | Porphyromonas         | Porphyromonas         |
| ASV1719 | Bacteria | Bacteroidetes | Bacteroidia | Bacteroidales | Porphyromonadaceae | Porphyromonas         | Porphyromonas         |
| ASV1718 | Bacteria | Bacteroidetes | Bacteroidia | Bacteroidales | Porphyromonadaceae | Porphyromonas         | Porphyromonas         |
| ASV1579 | Bacteria | Bacteroidetes | Bacteroidia | Bacteroidales | Porphyromonadaceae | Porphyromonadaceae    | Porphyromonadaceae    |
| ASV1580 | Bacteria | Bacteroidetes | Bacteroidia | Bacteroidales | Porphyromonadaceae | Porphyromonas         | Porphyromonas         |
| ASV1447 | Bacteria | Bacteroidetes | Bacteroidia | Bacteroidales | Porphyromonadaceae | Porphyromonas         | Porphyromonas         |
| ASV1365 | Bacteria | Bacteroidetes | Bacteroidia | Bacteroidales | Porphyromonadaceae | Porphyromonas         | Porphyromonas         |
| ASV1605 | Bacteria | Bacteroidetes | Bacteroidia | Bacteroidales | Porphyromonadaceae | Porphyromonas         | Porphyromonas         |
| ASV1656 | Bacteria | Bacteroidetes | Bacteroidia | Bacteroidales | Porphyromonadaceae | Porphyromonas         | Porphyromonas         |
| ASV1218 | Bacteria | Bacteroidetes | Bacteroidia | Bacteroidales | Porphyromonadaceae | Porphyromonas         | Porphyromonas         |
| ASV578  | Bacteria | Bacteroidetes | Bacteroidia | Bacteroidales | Porphyromonadaceae | Porphyromonas         | Porphyromonas         |
| ASV791  | Bacteria | Bacteroidetes | Bacteroidia | Bacteroidales | Porphyromonadaceae | Porphyromonas         | Porphyromonas_gulae   |
| ASV29   | Bacteria | Bacteroidetes | Bacteroidia | Bacteroidales | Porphyromonadaceae | Porphyromonas         | Porphyromonas_gulae   |
| ASV61   | Bacteria | Bacteroidetes | Bacteroidia | Bacteroidales | Porphyromonadaceae | Porphyromonas         | Porphyromonas         |
| ASV12   | Bacteria | Bacteroidetes | Bacteroidia | Bacteroidales | Porphyromonadaceae | Porphyromonas         | Porphyromonas         |
| ASV91   | Bacteria | Bacteroidetes | Bacteroidia | Bacteroidales | Porphyromonadaceae | Porphyromonas         | Porphyromonas_gulae   |
| ASV114  | Bacteria | Bacteroidetes | Bacteroidia | Bacteroidales | Porphyromonadaceae | Porphyromonas         | Porphyromonas         |
| ASV195  | Bacteria | Bacteroidetes | Bacteroidia | Bacteroidales | Porphyromonadaceae | Porphyromonas         | Porphyromonas_gulae   |
| ASV1625 | Bacteria | Bacteroidetes | Bacteroidia | Bacteroidales | Porphyromonadaceae | Porphyromonas         | Porphyromonas         |
| ASV141  | Bacteria | Bacteroidetes | Bacteroidia | Bacteroidales | Porphyromonadaceae | Porphyromonas         | Porphyromonas_gulae   |
| ASV7    | Bacteria | Bacteroidetes | Bacteroidia | Bacteroidales | Porphyromonadaceae | Porphyromonas         | Porphyromonas         |

|         |          |                       |             |               |                    |               |               |
|---------|----------|-----------------------|-------------|---------------|--------------------|---------------|---------------|
| ASV8    | Bacteria | Bacteroidetes         | Bacteroidia | Bacteroidales | Porphyromonadaceae | Porphyromonas | Porphyromonas |
| ASV23   | Bacteria | Bacteroidetes         | Bacteroidia | Bacteroidales | Porphyromonadaceae | Porphyromonas | Porphyromonas |
| ASV112  | Bacteria | Bacteroidetes         | Bacteroidia | Bacteroidales | Porphyromonadaceae | Porphyromonas | Porphyromonas |
| ASV120  | Bacteria | Bacteroidetes         | Bacteroidia | Bacteroidales | Porphyromonadaceae | Porphyromonas | Porphyromonas |
| ASV1664 | Bacteria | Bacteroidetes         | Bacteroidia | Bacteroidales | Porphyromonadaceae | Porphyromonas | Porphyromonas |
| ASV125  | Bacteria | Saccharibacteria(TM7) | TM7_C-1     | TM7_O-1       | TM7_F-1            | TM7_G-3       | TM7_G-3       |
| ASV559  | Bacteria | Saccharibacteria(TM7) | TM7_C-1     | TM7_O-1       | TM7_F-1            | TM7_G-3       | TM7_G-3       |
| ASV338  | Bacteria | Saccharibacteria(TM7) | TM7_C-1     | TM7_O-1       | TM7_F-1            | TM7_G-3       | TM7_G-3       |
| ASV683  | Bacteria | Saccharibacteria(TM7) | TM7_C-1     | TM7_O-1       | TM7_F-1            | TM7_G-3       | TM7_G-3       |
| ASV212  | Bacteria | Saccharibacteria(TM7) | TM7_C-1     | TM7_O-1       | TM7_F-1            | TM7_G-3       | TM7_G-3       |
| ASV1134 | Bacteria | Saccharibacteria(TM7) | TM7_C-1     | TM7_O-1       | TM7_F-1            | TM7_G-3       | TM7_G-3       |
| ASV776  | Bacteria | Saccharibacteria(TM7) | TM7_C-1     | TM7_O-1       | TM7_F-1            | TM7_G-3       | TM7_G-3       |
| ASV355  | Bacteria | Saccharibacteria(TM7) | TM7_C-1     | TM7_O-1       | TM7_F-1            | TM7_G-3       | TM7_G-3       |
| ASV714  | Bacteria | Saccharibacteria(TM7) | TM7_C-1     | TM7_O-1       | TM7_F-1            | TM7_G-3       | TM7_G-3       |
| ASV320  | Bacteria | Saccharibacteria(TM7) | TM7_C-1     | TM7_O-1       | TM7_F-1            | TM7_G-3       | TM7_G-3       |
| ASV102  | Bacteria | Saccharibacteria(TM7) | TM7_C-1     | TM7_O-1       | TM7_F-1            | TM7_G-3       | TM7_G-3       |
| ASV265  | Bacteria | Saccharibacteria(TM7) | TM7_C-1     | TM7_O-1       | TM7_F-1            | TM7_G-3       | TM7_G-3       |
| ASV285  | Bacteria | Saccharibacteria(TM7) | TM7_C-1     | TM7_O-1       | TM7_F-1            | TM7_G-3       | TM7_G-3       |
| ASV436  | Bacteria | Saccharibacteria(TM7) | TM7_C-1     | TM7_O-1       | TM7_F-1            | TM7_G-3       | TM7_G-3       |



|         |          |                       |         |         |         |         |         |
|---------|----------|-----------------------|---------|---------|---------|---------|---------|
| ASV1011 | Bacteria | Saccharibacteria(TM7) | TM7_C-1 | TM7_O-1 | TM7_F-1 | TM7_G-3 | TM7_G-3 |
| ASV652  | Bacteria | Saccharibacteria(TM7) | TM7_C-1 | TM7_O-1 | TM7_F-1 | TM7_G-3 | TM7_G-3 |
| ASV1022 | Bacteria | Saccharibacteria(TM7) | TM7_C-1 | TM7_O-1 | TM7_F-1 | TM7_G-3 | TM7_G-3 |
| ASV1181 | Bacteria | Saccharibacteria(TM7) | TM7_C-1 | TM7_O-1 | TM7_F-1 | TM7_G-3 | TM7_G-3 |
| ASV1487 | Bacteria | Saccharibacteria(TM7) | TM7_C-1 | TM7_O-1 | TM7_F-1 | TM7_G-3 | TM7_G-3 |
| ASV178  | Bacteria | Saccharibacteria(TM7) | TM7_C-1 | TM7_O-1 | TM7_F-1 | TM7_G-3 | TM7_G-3 |
| ASV1156 | Bacteria | Saccharibacteria(TM7) | TM7_C-1 | TM7_O-1 | TM7_F-1 | TM7_G-3 | TM7_G-3 |
| ASV336  | Bacteria | Saccharibacteria(TM7) | TM7_C-1 | TM7_O-1 | TM7_F-1 | TM7_G-3 | TM7_G-3 |
| ASV587  | Bacteria | Saccharibacteria(TM7) | TM7_C-1 | TM7_O-1 | TM7_F-1 | TM7_G-3 | TM7_G-3 |
| ASV507  | Bacteria | Saccharibacteria(TM7) | TM7_C-1 | TM7_O-1 | TM7_F-1 | TM7_G-3 | TM7_G-3 |
| ASV444  | Bacteria | Saccharibacteria(TM7) | TM7_C-1 | TM7_O-1 | TM7_F-1 | TM7_G-3 | TM7_G-3 |
| ASV1551 | Bacteria | Saccharibacteria(TM7) | TM7_C-1 | TM7_O-1 | TM7_F-1 | TM7_G-3 | TM7_G-3 |
| ASV376  | Bacteria | Saccharibacteria(TM7) | TM7_C-1 | TM7_O-1 | TM7_F-1 | TM7_G-2 | TM7_G-2 |
| ASV737  | Bacteria | Saccharibacteria(TM7) | TM7_C-1 | TM7_O-1 | TM7_F-1 | TM7_G-2 | TM7_G-2 |
| ASV1042 | Bacteria | Saccharibacteria(TM7) | TM7_C-1 | TM7_O-1 | TM7_F-1 | TM7_G-2 | TM7_G-2 |
| ASV1353 | Bacteria | Saccharibacteria(TM7) | TM7_C-1 | TM7_O-1 | TM7_F-1 | TM7_G-2 | TM7_G-2 |
| ASV1542 | Bacteria | Saccharibacteria(TM7) | TM7_C-1 | TM7_O-1 | TM7_F-1 | TM7_G-2 | TM7_G-2 |

|         |          |                       |                       |                       |                       |                       |                       |
|---------|----------|-----------------------|-----------------------|-----------------------|-----------------------|-----------------------|-----------------------|
| ASV407  | Bacteria | Saccharibacteria(TM7) | TM7_C-1               | TM7_O-1               | TM7_F-1               | TM7_G-2               | TM7_G-2               |
| ASV731  | Bacteria | Saccharibacteria(TM7) | TM7_C-1               | TM7_O-1               | TM7_F-1               | TM7_F-1               | TM7_F-1               |
| ASV1367 | Bacteria | Saccharibacteria(TM7) | Saccharibacteria(TM7) | Saccharibacteria(TM7) | Saccharibacteria(TM7) | Saccharibacteria(TM7) | Saccharibacteria(TM7) |
| ASV294  | Bacteria | Saccharibacteria(TM7) | TM7_C-1               | TM7_O-1               | TM7_F-1               | TM7_G-2               | TM7_G-2               |
| ASV173  | Bacteria | Saccharibacteria(TM7) | TM7_C-1               | TM7_O-1               | TM7_F-1               | TM7_G-2               | TM7_G-2               |
| ASV514  | Bacteria | Saccharibacteria(TM7) | TM7_C-1               | TM7_O-1               | TM7_F-1               | TM7_G-2               | TM7_G-2               |
| ASV460  | Bacteria | Saccharibacteria(TM7) | TM7_C-1               | TM7_O-1               | TM7_F-1               | TM7_G-2               | TM7_G-2               |
| ASV409  | Bacteria | Saccharibacteria(TM7) | TM7_C-1               | TM7_O-1               | TM7_F-1               | TM7_G-2               | TM7_G-2               |
| ASV52   | Bacteria | Saccharibacteria(TM7) | TM7_C-1               | TM7_O-1               | TM7_F-1               | TM7_G-2               | TM7_G-2               |
| ASV573  | Bacteria | Saccharibacteria(TM7) | TM7_C-1               | TM7_O-1               | TM7_F-1               | TM7_G-2               | TM7_G-2               |
| ASV1713 | Bacteria | Saccharibacteria(TM7) | TM7_C-1               | TM7_O-1               | TM7_F-1               | TM7_G-1               | TM7_G-1               |
| ASV1724 | Bacteria | Saccharibacteria(TM7) | TM7_C-1               | TM7_O-1               | TM7_F-1               | TM7_G-1               | TM7_G-1               |
| ASV1725 | Bacteria | Saccharibacteria(TM7) | TM7_C-1               | TM7_O-1               | TM7_F-1               | TM7_G-1               | TM7_G-1               |
| ASV426  | Bacteria | Saccharibacteria(TM7) | TM7_C-1               | TM7_O-1               | TM7_F-1               | TM7_G-1               | TM7_G-1               |
| ASV853  | Bacteria | Saccharibacteria(TM7) | TM7_C-1               | TM7_O-1               | TM7_F-1               | TM7_G-1               | TM7_G-1               |
| ASV1187 | Bacteria | Saccharibacteria(TM7) | TM7_C-1               | TM7_O-1               | TM7_F-1               | TM7_G-1               | TM7_G-1               |
| ASV211  | Bacteria | Saccharibacteria(TM7) | TM7_C-1               | TM7_O-1               | TM7_F-1               | TM7_G-1               | TM7_G-1               |

|         |          |                           |         |         |         |         |         |
|---------|----------|---------------------------|---------|---------|---------|---------|---------|
| ASV296  | Bacteria | Saccharibacter<br>ia(TM7) | TM7_C-1 | TM7_O-1 | TM7_F-1 | TM7_G-1 | TM7_G-1 |
| ASV1079 | Bacteria | Saccharibacter<br>ia(TM7) | TM7_C-1 | TM7_O-1 | TM7_F-1 | TM7_G-1 | TM7_G-1 |
| ASV201  | Bacteria | Saccharibacter<br>ia(TM7) | TM7_C-1 | TM7_O-1 | TM7_F-1 | TM7_G-1 | TM7_G-1 |
| ASV763  | Bacteria | Saccharibacter<br>ia(TM7) | TM7_C-1 | TM7_O-1 | TM7_F-1 | TM7_G-1 | TM7_G-1 |
| ASV419  | Bacteria | Saccharibacter<br>ia(TM7) | TM7_C-1 | TM7_O-1 | TM7_F-1 | TM7_G-1 | TM7_G-1 |
| ASV1148 | Bacteria | Saccharibacter<br>ia(TM7) | TM7_C-1 | TM7_O-1 | TM7_F-1 | TM7_G-1 | TM7_G-1 |
| ASV67   | Bacteria | Saccharibacter<br>ia(TM7) | TM7_C-1 | TM7_O-1 | TM7_F-1 | TM7_G-1 | TM7_G-1 |
| ASV965  | Bacteria | Saccharibacter<br>ia(TM7) | TM7_C-1 | TM7_O-1 | TM7_F-1 | TM7_G-1 | TM7_G-1 |
| ASV774  | Bacteria | Saccharibacter<br>ia(TM7) | TM7_C-1 | TM7_O-1 | TM7_F-1 | TM7_G-1 | TM7_G-1 |
| ASV510  | Bacteria | Saccharibacter<br>ia(TM7) | TM7_C-1 | TM7_O-1 | TM7_F-1 | TM7_G-1 | TM7_G-1 |
| ASV260  | Bacteria | Saccharibacter<br>ia(TM7) | TM7_C-1 | TM7_O-1 | TM7_F-1 | TM7_G-1 | TM7_G-1 |
| ASV572  | Bacteria | Saccharibacter<br>ia(TM7) | TM7_C-1 | TM7_O-1 | TM7_F-1 | TM7_G-1 | TM7_G-1 |
| ASV988  | Bacteria | Saccharibacter<br>ia(TM7) | TM7_C-1 | TM7_O-1 | TM7_F-1 | TM7_G-1 | TM7_G-1 |
| ASV1261 | Bacteria | Saccharibacter<br>ia(TM7) | TM7_C-1 | TM7_O-1 | TM7_F-1 | TM7_G-1 | TM7_G-1 |
| ASV605  | Bacteria | Saccharibacter<br>ia(TM7) | TM7_C-1 | TM7_O-1 | TM7_F-1 | TM7_G-1 | TM7_G-1 |
| ASV829  | Bacteria | Saccharibacter<br>ia(TM7) | TM7_C-1 | TM7_O-1 | TM7_F-1 | TM7_G-1 | TM7_G-1 |
| ASV880  | Bacteria | Saccharibacter<br>ia(TM7) | TM7_C-1 | TM7_O-1 | TM7_F-1 | TM7_G-1 | TM7_G-1 |

|         |          |                         |         |         |         |         |         |
|---------|----------|-------------------------|---------|---------|---------|---------|---------|
| ASV253  | Bacteria | Saccharibacteria(TM7)   | TM7_C-1 | TM7_O-1 | TM7_F-1 | TM7_G-1 | TM7_G-1 |
| ASV1322 | Bacteria | Saccharibacteria(TM7)   | TM7_C-1 | TM7_O-1 | TM7_F-1 | TM7_G-1 | TM7_G-1 |
| ASV263  | Bacteria | Absconditabacteria(SR1) | SR1_C-1 | SR1_O-1 | SR1_F-1 | SR1_G-1 | SR1_G-1 |
| ASV708  | Bacteria | Absconditabacteria(SR1) | SR1_C-1 | SR1_O-1 | SR1_F-1 | SR1_G-1 | SR1_G-1 |
| ASV745  | Bacteria | Absconditabacteria(SR1) | SR1_C-1 | SR1_O-1 | SR1_F-1 | SR1_G-1 | SR1_G-1 |
| ASV318  | Bacteria | Absconditabacteria(SR1) | SR1_C-1 | SR1_O-1 | SR1_F-1 | SR1_G-1 | SR1_G-1 |
| ASV478  | Bacteria | Absconditabacteria(SR1) | SR1_C-1 | SR1_O-1 | SR1_F-1 | SR1_G-1 | SR1_G-1 |
| ASV780  | Bacteria | Absconditabacteria(SR1) | SR1_C-1 | SR1_O-1 | SR1_F-1 | SR1_G-1 | SR1_G-1 |
| ASV441  | Bacteria | Absconditabacteria(SR1) | SR1_C-1 | SR1_O-1 | SR1_F-1 | SR1_G-1 | SR1_G-1 |
| ASV381  | Bacteria | Absconditabacteria(SR1) | SR1_C-1 | SR1_O-1 | SR1_F-1 | SR1_G-1 | SR1_G-1 |
| ASV1171 | Bacteria | Absconditabacteria(SR1) | SR1_C-1 | SR1_O-1 | SR1_F-1 | SR1_G-1 | SR1_G-1 |
| ASV349  | Bacteria | Absconditabacteria(SR1) | SR1_C-1 | SR1_O-1 | SR1_F-1 | SR1_G-1 | SR1_G-1 |
| ASV351  | Bacteria | Absconditabacteria(SR1) | SR1_C-1 | SR1_O-1 | SR1_F-1 | SR1_G-1 | SR1_G-1 |
| ASV147  | Bacteria | Absconditabacteria(SR1) | SR1_C-1 | SR1_O-1 | SR1_F-1 | SR1_G-1 | SR1_G-1 |
| ASV1308 | Bacteria | Absconditabacteria(SR1) | SR1_C-1 | SR1_O-1 | SR1_F-1 | SR1_G-1 | SR1_G-1 |
| ASV1205 | Bacteria | Absconditabacteria(SR1) | SR1_C-1 | SR1_O-1 | SR1_F-1 | SR1_G-1 | SR1_G-1 |
| ASV1047 | Bacteria | Absconditabacteria(SR1) | SR1_C-1 | SR1_O-1 | SR1_F-1 | SR1_G-1 | SR1_G-1 |



|         |          |                           |             |             |              |              |              |
|---------|----------|---------------------------|-------------|-------------|--------------|--------------|--------------|
| ASV1730 | Bacteria | Absconditabacteria(SR1)   | SR1_C-1     | SR1_O-1     | SR1_F-1      | SR1_G-1      | SR1_G-1      |
| ASV1538 | Bacteria | Cyanobacteria/Chloroplast | Chloroplast | Chloroplast | Streptophyta | Streptophyta | Streptophyta |
| ASV78   | Bacteria | Bacteria                  | Bacteria    | Bacteria    | Bacteria     | Bacteria     | Bacteria     |
| ASV826  | Bacteria | Bacteria                  | Bacteria    | Bacteria    | Bacteria     | Bacteria     | Bacteria     |
| ASV1267 | Bacteria | Bacteria                  | Bacteria    | Bacteria    | Bacteria     | Bacteria     | Bacteria     |
| ASV273  | Bacteria | Bacteria                  | Bacteria    | Bacteria    | Bacteria     | Bacteria     | Bacteria     |
| ASV307  | Bacteria | Bacteria                  | Bacteria    | Bacteria    | Bacteria     | Bacteria     | Bacteria     |
| ASV325  | Bacteria | Gracilibacteria (GN02)    | GN02_C-1    | GN02_O-1    | GN02_F-1     | GN02_G-1     | GN02_G-1     |
| ASV673  | Bacteria | Gracilibacteria (GN02)    | GN02_C-1    | GN02_O-1    | GN02_F-1     | GN02_G-1     | GN02_G-1     |
| ASV1172 | Bacteria | Gracilibacteria (GN02)    | GN02_C-1    | GN02_O-1    | GN02_F-1     | GN02_G-1     | GN02_G-1     |
| ASV491  | Bacteria | Gracilibacteria (GN02)    | GN02_C-1    | GN02_O-1    | GN02_F-1     | GN02_G-1     | GN02_G-1     |
| ASV984  | Bacteria | Gracilibacteria (GN02)    | GN02_C-1    | GN02_O-1    | GN02_F-1     | GN02_G-1     | GN02_G-1     |
| ASV458  | Bacteria | Gracilibacteria (GN02)    | GN02_C-1    | GN02_O-1    | GN02_F-1     | GN02_G-1     | GN02_G-1     |
| ASV734  | Bacteria | Gracilibacteria (GN02)    | GN02_C-1    | GN02_O-1    | GN02_F-1     | GN02_G-1     | GN02_G-1     |
| ASV1176 | Bacteria | Gracilibacteria (GN02)    | GN02_C-1    | GN02_O-1    | GN02_F-1     | GN02_G-1     | GN02_G-1     |
| ASV864  | Bacteria | Gracilibacteria (GN02)    | GN02_C-1    | GN02_O-1    | GN02_F-1     | GN02_G-1     | GN02_G-1     |
| ASV268  | Bacteria | Gracilibacteria (GN02)    | GN02_C-1    | GN02_O-1    | GN02_F-1     | GN02_G-1     | GN02_G-1     |
| ASV395  | Bacteria | Gracilibacteria (GN02)    | GN02_C-1    | GN02_O-1    | GN02_F-1     | GN02_G-1     | GN02_G-1     |
| ASV577  | Bacteria | Gracilibacteria (GN02)    | GN02_C-1    | GN02_O-1    | GN02_F-1     | GN02_G-1     | GN02_G-1     |

|         |          |                        |            |                 |                  |            |                       |
|---------|----------|------------------------|------------|-----------------|------------------|------------|-----------------------|
| ASV1700 | Bacteria | Gracilibacteria (GN02) | GN02_C-1   | GN02_O-1        | GN02_F-1         | GN02_G-1   | GN02_G-1              |
| ASV952  | Bacteria | Gracilibacteria (GN02) | GN02_C-1   | GN02_O-1        | GN02_F-1         | GN02_G-1   | GN02_G-1              |
| ASV1541 | Bacteria | Gracilibacteria (GN02) | GN02_C-1   | GN02_O-1        | GN02_F-1         | GN02_G-2   | GN02_G-2              |
| ASV378  | Bacteria | Gracilibacteria (GN02) | GN02_C-1   | GN02_O-1        | GN02_F-1         | GN02_G-2   | GN02_G-2              |
| ASV1457 | Bacteria | Gracilibacteria (GN02) | GN02_C-1   | GN02_O-1        | GN02_F-1         | GN02_G-2   | GN02_G-2              |
| ASV383  | Bacteria | Gracilibacteria (GN02) | GN02_C-1   | GN02_O-1        | GN02_F-1         | GN02_G-2   | GN02_G-2              |
| ASV108  | Bacteria | Gracilibacteria (GN02) | GN02_C-1   | GN02_O-1        | GN02_F-1         | GN02_G-2   | GN02_G-2              |
| ASV783  | Bacteria | Gracilibacteria (GN02) | GN02_C-1   | GN02_O-1        | GN02_F-1         | GN02_G-2   | GN02_G-2              |
| ASV1467 | Bacteria | Gracilibacteria (GN02) | GN02_C-1   | GN02_O-1        | GN02_F-1         | GN02_G-2   | GN02_G-2              |
| ASV208  | Bacteria | Gracilibacteria (GN02) | GN02_C-1   | GN02_O-1        | GN02_F-1         | GN02_G-2   | GN02_G-2              |
| ASV74   | Bacteria | Gracilibacteria (GN02) | GN02_C-1   | GN02_O-1        | GN02_F-1         | GN02_G-2   | GN02_G-2              |
| ASV1174 | Bacteria | Gracilibacteria (GN02) | GN02_C-1   | GN02_O-1        | GN02_F-1         | GN02_G-2   | GN02_G-2              |
| ASV1250 | Bacteria | Tenericutes            | Mollicutes | Mycoplasmatales | Mycoplasmataceae | Mycoplasma | Mycoplasma            |
| ASV1326 | Bacteria | Tenericutes            | Mollicutes | Mycoplasmatales | Mycoplasmataceae | Mycoplasma | Mycoplasma            |
| ASV508  | Bacteria | Tenericutes            | Mollicutes | Mycoplasmatales | Mycoplasmataceae | Mycoplasma | Mycoplasma_edwardii   |
| ASV167  | Bacteria | Tenericutes            | Mollicutes | Mycoplasmatales | Mycoplasmataceae | Mycoplasma | Mycoplasma_canis      |
| ASV1372 | Bacteria | Tenericutes            | Mollicutes | Mycoplasmatales | Mycoplasmataceae | Mycoplasma | Mycoplasma            |
| ASV948  | Bacteria | Tenericutes            | Mollicutes | Mycoplasmatales | Mycoplasmataceae | Mycoplasma | Mycoplasma            |
| ASV1222 | Bacteria | Firmicutes             | Mollicutes | Mycoplasmatales | Mycoplasmataceae | Mycoplasma | Mycoplasma_lipophilum |
| ASV398  | Bacteria | Tenericutes            | Mollicutes | Mycoplasmatales | Mycoplasmataceae | Mycoplasma | Mycoplasma            |
| ASV345  | Bacteria | Tenericutes            | Mollicutes | Mycoplasmatales | Mycoplasmataceae | Mycoplasma | Mycoplasma_maculosum  |

|         |          |                |                       |                   |                   |                   |                    |
|---------|----------|----------------|-----------------------|-------------------|-------------------|-------------------|--------------------|
| ASV1374 | Bacteria | Tenericutes    | Mollicutes            | Mycoplasmatales   | Mycoplasmataceae  | Mycoplasma        | Mycoplasma         |
| ASV602  | Bacteria | Tenericutes    | Mollicutes            | Mycoplasmatales   | Mycoplasmataceae  | Mycoplasma        | Mycoplasma_molare  |
| ASV817  | Bacteria | Tenericutes    | Mollicutes            | Mycoplasmatales   | Mycoplasmataceae  | Mycoplasma        | Mycoplasma         |
| ASV1688 | Bacteria | Tenericutes    | Mollicutes            | Mycoplasmatales   | Mycoplasmataceae  | Mycoplasma        | Mycoplasma         |
| ASV690  | Bacteria | Firmicutes     | Mollicutes            | Mycoplasmatales   | Mycoplasmataceae  | Mycoplasma        | Mycoplasma_spumans |
| ASV1393 | Bacteria | Firmicutes     | Mollicutes            | Mycoplasmatales   | Mycoplasmataceae  | Mycoplasma        | Mycoplasma         |
| ASV939  | Bacteria | Firmicutes     | Mollicutes            | Mycoplasmatales   | Mycoplasmataceae  | Mycoplasma        | Mycoplasma         |
| ASV1576 | Bacteria | Firmicutes     | Mollicutes            | Mycoplasmatales   | Mycoplasmataceae  | Mycoplasma        | Mycoplasma         |
| ASV1485 | Bacteria | Firmicutes     | Mollicutes            | Mycoplasmatales   | Mycoplasmataceae  | Mycoplasma        | Mycoplasma         |
| ASV827  | Bacteria | Firmicutes     | Mollicutes            | Mycoplasmatales   | Mycoplasmataceae  | Mycoplasma        | Mycoplasma         |
| ASV888  | Bacteria | Firmicutes     | Mollicutes            | Mycoplasmatales   | Mycoplasmataceae  | Mycoplasma        | Mycoplasma         |
| ASV1425 | Bacteria | Firmicutes     | Mollicutes            | Mycoplasmatales   | Mycoplasmataceae  | Mycoplasma        | Mycoplasma         |
| ASV781  | Bacteria | Firmicutes     | Mollicutes            | Mycoplasmatales   | Mycoplasmataceae  | Mycoplasma        | Mycoplasma         |
| ASV1465 | Bacteria | Firmicutes     | Mollicutes            | Mycoplasmatales   | Mycoplasmataceae  | Mycoplasma        | Mycoplasma         |
| ASV1564 | Bacteria | Firmicutes     | Mollicutes            | Mycoplasmatales   | Mycoplasmataceae  | Mycoplasma        | Mycoplasma         |
| ASV1288 | Bacteria | Firmicutes     | Mollicutes            | Mycoplasmatales   | Mycoplasmataceae  | Mycoplasma        | Mycoplasma         |
| ASV1184 | Bacteria | Firmicutes     | Mollicutes            | Mycoplasmatales   | Mycoplasmataceae  | Mycoplasma        | Mycoplasma         |
| ASV1191 | Bacteria | Firmicutes     | Mollicutes            | Mycoplasmatales   | Mycoplasmataceae  | Mycoplasma        | Mycoplasma         |
| ASV899  | Bacteria | Proteobacteria | Epsilonproteobacteria | Campylobacterales | Campylobacterales | Campylobacterales | Campylobacterales  |
| ASV1094 | Bacteria | Proteobacteria | Epsilonproteobacteria | Campylobacterales | Hydrogenimonaceae | Hydrogenimonas    | Hydrogenimonas     |
| ASV900  | Bacteria | Proteobacteria | Epsilonproteobacteria | Campylobacterales | Campylobacterales | Campylobacterales | Campylobacterales  |
| ASV1685 | Bacteria | Proteobacteria | Epsilonproteobacteria | Campylobacterales | Hydrogenimonaceae | Hydrogenimonas    | Hydrogenimonas     |
| ASV1729 | Bacteria | Proteobacteria | Epsilonproteobacteria | Campylobacterales | Campylobacterales | Campylobacterales | Campylobacterales  |
| ASV503  | Bacteria | Proteobacteria | Epsilonproteobacteria | Campylobacterales | Campylobacterales | Campylobacterales | Campylobacterales  |



|         |          |                |                       |                   |                    |                   |                        |
|---------|----------|----------------|-----------------------|-------------------|--------------------|-------------------|------------------------|
| ASV777  | Bacteria | Proteobacteria | Epsilonproteobacteria | Campylobacterales | Campylobacterales  | Campylobacterales | Campylobacterales      |
| ASV719  | Bacteria | Proteobacteria | Epsilonproteobacteria | Campylobacterales | Campylobacterales  | Campylobacterales | Campylobacterales      |
| ASV1450 | Bacteria | Proteobacteria | Epsilonproteobacteria | Campylobacterales | Campylobacterales  | Campylobacterales | Campylobacterales      |
| ASV994  | Bacteria | Proteobacteria | Epsilonproteobacteria | Campylobacterales | Helicobacteraceae  | Helicobacteraceae | Helicobacteraceae      |
| ASV57   | Bacteria | Proteobacteria | Epsilonproteobacteria | Campylobacterales | Campylobacteraceae | Arcobacter        | Arcobacter             |
| ASV65   | Bacteria | Proteobacteria | Epsilonproteobacteria | Campylobacterales | Campylobacteraceae | Arcobacter        | Arcobacter_sp._COT_276 |
| ASV256  | Bacteria | Proteobacteria | Epsilonproteobacteria | Campylobacterales | Campylobacteraceae | Arcobacter        | Arcobacter             |
| ASV1553 | Bacteria | Proteobacteria | Epsilonproteobacteria | Campylobacterales | Campylobacteraceae | Arcobacter        | Arcobacter             |
| ASV1603 | Bacteria | Proteobacteria | Epsilonproteobacteria | Campylobacterales | Campylobacteraceae | Arcobacter        | Arcobacter             |
| ASV1657 | Bacteria | Proteobacteria | Epsilonproteobacteria | Campylobacterales | Campylobacteraceae | Arcobacter        | Arcobacter             |
| ASV1698 | Bacteria | Proteobacteria | Epsilonproteobacteria | Campylobacterales | Campylobacteraceae | Arcobacter        | Arcobacter             |
| ASV1228 | Bacteria | Proteobacteria | Epsilonproteobacteria | Campylobacterales | Helicobacteraceae  | Wolinella         | Wolinella              |
| ASV1245 | Bacteria | Proteobacteria | Epsilonproteobacteria | Campylobacterales | Helicobacteraceae  | Wolinella         | Wolinella              |
| ASV49   | Bacteria | Proteobacteria | Epsilonproteobacteria | Campylobacterales | Helicobacteraceae  | Wolinella         | Wolinella              |
| ASV1343 | Bacteria | Proteobacteria | Epsilonproteobacteria | Campylobacterales | Campylobacteraceae | Campylobacter     | Campylobacter          |
| ASV1618 | Bacteria | Proteobacteria | Epsilonproteobacteria | Campylobacterales | Campylobacteraceae | Campylobacter     | Campylobacter          |
| ASV986  | Bacteria | Proteobacteria | Epsilonproteobacteria | Campylobacterales | Campylobacteraceae | Campylobacter     | Campylobacter          |

|         |          |                |                       |                   |                    |                 |                            |
|---------|----------|----------------|-----------------------|-------------------|--------------------|-----------------|----------------------------|
| ASV1198 | Bacteria | Proteobacteria | Epsilonproteobacteria | Campylobacterales | Campylobacteraceae | Campylobacter   | Campylobacter              |
| ASV1519 | Bacteria | Proteobacteria | Epsilonproteobacteria | Campylobacterales | Campylobacteraceae | Campylobacter   | Campylobacter              |
| ASV575  | Bacteria | Proteobacteria | Epsilonproteobacteria | Campylobacterales | Campylobacteraceae | Campylobacter   | Campylobacter_mucosalis    |
| ASV760  | Bacteria | Proteobacteria | Epsilonproteobacteria | Campylobacterales | Campylobacteraceae | Campylobacter   | Campylobacter              |
| ASV989  | Bacteria | Proteobacteria | Epsilonproteobacteria | Campylobacterales | Campylobacteraceae | Campylobacter   | Campylobacter              |
| ASV387  | Bacteria | Proteobacteria | Epsilonproteobacteria | Campylobacterales | Campylobacteraceae | Campylobacter   | Campylobacter              |
| ASV628  | Bacteria | Proteobacteria | Epsilonproteobacteria | Campylobacterales | Campylobacteraceae | Campylobacter   | Campylobacter              |
| ASV553  | Bacteria | Proteobacteria | Epsilonproteobacteria | Campylobacterales | Campylobacteraceae | Campylobacter   | Campylobacter              |
| ASV267  | Bacteria | Proteobacteria | Epsilonproteobacteria | Campylobacterales | Campylobacteraceae | Campylobacter   | Campylobacter              |
| ASV231  | Bacteria | Proteobacteria | Epsilonproteobacteria | Campylobacterales | Campylobacteraceae | Campylobacter   | Campylobacter              |
| ASV9    | Bacteria | Proteobacteria | Epsilonproteobacteria | Campylobacterales | Campylobacteraceae | Campylobacter   | Campylobacter              |
| ASV335  | Bacteria | Proteobacteria | Epsilonproteobacteria | Campylobacterales | Campylobacteraceae | Campylobacter   | Campylobacter              |
| ASV22   | Bacteria | Firmicutes     | Bacilli               | Lactobacillales   | Carnobacteriaceae  | Granulicatella  | Granulicatella_sp._COT_095 |
| ASV600  | Bacteria | Firmicutes     | Bacilli               | Lactobacillales   | Carnobacteriaceae  | Granulicatella  | Granulicatella             |
| ASV305  | Bacteria | Firmicutes     | Bacilli               | Lactobacillales   | Carnobacteriaceae  | Granulicatella  | Granulicatella             |
| ASV969  | Bacteria | Firmicutes     | Bacilli               | Lactobacillales   | Lactobacillales    | Lactobacillales | Lactobacillales            |
| ASV421  | Bacteria | Firmicutes     | Bacilli               | Lactobacillales   | Aerococcaceae      | Globicatella    | Globicatella               |
| ASV1166 | Bacteria | Firmicutes     | Bacilli               | Lactobacillales   | Aerococcaceae      | Globicatella    | Globicatella               |
| ASV1414 | Bacteria | Firmicutes     | Bacilli               | Lactobacillales   | Aerococcaceae      | Globicatella    | Globicatella               |
| ASV1453 | Bacteria | Firmicutes     | Bacilli               | Lactobacillales   | Aerococcaceae      | Globicatella    | Globicatella               |

|         |          |            |                  |                    |                              |               |                             |
|---------|----------|------------|------------------|--------------------|------------------------------|---------------|-----------------------------|
| ASV487  | Bacteria | Firmicutes | Bacilli          | Lactobacillales    | Aerococcaceae                | Abiotrophia   | Abiotrophia                 |
| ASV655  | Bacteria | Firmicutes | Bacilli          | Lactobacillales    | Aerococcaceae                | Abiotrophia   | Abiotrophia                 |
| ASV1073 | Bacteria | Firmicutes | Bacilli          | Lactobacillales    | Aerococcaceae                | Abiotrophia   | Abiotrophia                 |
| ASV1420 | Bacteria | Firmicutes | Bacilli          | Lactobacillales    | Aerococcaceae                | Abiotrophia   | Abiotrophia                 |
| ASV1497 | Bacteria | Firmicutes | Bacilli          | Lactobacillales    | Enterococcaceae              | Enterococcus  | Enterococcus_cecorum        |
| ASV1089 | Bacteria | Firmicutes | Bacilli          | Lactobacillales    | Lactobacillaceae             | Lactobacillus | Lactobacillus               |
| ASV1236 | Bacteria | Firmicutes | Bacilli          | Lactobacillales    | Lactobacillaceae             | Lactobacillus | Lactobacillus               |
| ASV891  | Bacteria | Firmicutes | Bacilli          | Lactobacillales    | Lactobacillaceae             | Lactobacillus | Lactobacillus               |
| ASV1566 | Bacteria | Firmicutes | Bacilli          | Lactobacillales    | Lactobacillaceae             | Lactobacillus | Lactobacillus               |
| ASV1312 | Bacteria | Firmicutes | Bacilli          | Lactobacillales    | Streptococcaceae             | Lactococcus   | Lactococcus_piscium         |
| ASV1490 | Bacteria | Firmicutes | Bacilli          | Lactobacillales    | Streptococcaceae             | Streptococcus | Streptococcus               |
| ASV1329 | Bacteria | Firmicutes | Bacilli          | Lactobacillales    | Streptococcaceae             | Streptococcus | Streptococcus               |
| ASV1521 | Bacteria | Firmicutes | Bacilli          | Lactobacillales    | Streptococcaceae             | Streptococcus | Streptococcus_alactolyticus |
| ASV674  | Bacteria | Firmicutes | Bacilli          | Lactobacillales    | Streptococcaceae             | Streptococcus | Streptococcus               |
| ASV554  | Bacteria | Firmicutes | Bacilli          | Lactobacillales    | Streptococcaceae             | Streptococcus | Streptococcus_sp._COT_279   |
| ASV1433 | Bacteria | Firmicutes | Bacilli          | Lactobacillales    | Streptococcaceae             | Streptococcus | Streptococcus               |
| ASV1411 | Bacteria | Firmicutes | Bacilli          | Lactobacillales    | Streptococcaceae             | Streptococcus | Streptococcus               |
| ASV699  | Bacteria | Firmicutes | Bacilli          | Lactobacillales    | Streptococcaceae             | Streptococcus | Streptococcus               |
| ASV950  | Bacteria | Firmicutes | Bacilli          | Lactobacillales    | Streptococcaceae             | Streptococcus | Streptococcus               |
| ASV1039 | Bacteria | Firmicutes | Bacilli          | Lactobacillales    | Streptococcaceae             | Streptococcus | Streptococcus               |
| ASV155  | Bacteria | Firmicutes | Bacilli          | Bacillales         | Bacillales_Incertae_Sedis_XI | Gemella       | Gemella                     |
| ASV1386 | Bacteria | Firmicutes | Erysipelotrichia | Erysipelotrichales | Erysipelotrichaceae          | Turicibacter  | Turicibacter                |
| ASV1648 | Bacteria | Firmicutes | Erysipelotrichia | Erysipelotrichales | Erysipelotrichaceae          | Turicibacter  | Turicibacter                |
| ASV801  | Bacteria | Firmicutes | Clostridia       | Clostridiales      | Peptococcaceae               | Peptococcus   | Peptococcus_sp._COT_344     |
| ASV1050 | Bacteria | Firmicutes | Clostridia       | Clostridiales      | Peptococcaceae               | Peptococcus   | Peptococcus                 |

|         |          |            |               |                 |                     |                        |                                   |
|---------|----------|------------|---------------|-----------------|---------------------|------------------------|-----------------------------------|
| ASV54   | Bacteria | Firmicutes | Clostridia    | Clostridiales   | Peptococcaceae      | Peptococcus            | Peptococcus_sp._COT_044           |
| ASV834  | Bacteria | Firmicutes | Clostridia    | Clostridiales   | Peptococcaceae      | Peptococcus            | Peptococcus_sp._COT_334           |
| ASV1554 | Bacteria | Firmicutes | Clostridia    | Clostridiales   | Eubacteriaceae_[XV] | Eubacterium            | Eubacterium                       |
| ASV466  | Bacteria | WPS-2      | WPS-2_C-1     | WPS-2_O-1       | WPS-2_F-1           | WPS-2_G-1              | WPS-2_G-1_sp._COT_220             |
| ASV220  | Bacteria | Firmicutes | Clostridia    | Clostridiales   | Veillonellaceae_IX  | Veillonellaceae_IX_G-1 | Veillonellaceae_IX_G-1            |
| ASV846  | Bacteria | Firmicutes | Clostridia    | Clostridiales   | Veillonellaceae_IX  | Veillonellaceae_IX_G-1 | Veillonellaceae_IX_G-1            |
| ASV758  | Bacteria | Firmicutes | Clostridia    | Clostridiales   | Veillonellaceae_IX  | Phascolarctobacterium  | Phascolarctobacterium_sp._COT_149 |
| ASV923  | Bacteria | Firmicutes | Clostridia    | Clostridiales   | Veillonellaceae_IX  | Phascolarctobacterium  | Phascolarctobacterium             |
| ASV1270 | Bacteria | Firmicutes | Negativicutes | Selenomonadales | Veillonellaceae     | Megamonas              | Megamonas                         |
| ASV1571 | Bacteria | Firmicutes | Negativicutes | Selenomonadales | Veillonellaceae     | Megamonas              | Megamonas                         |
| ASV588  | Bacteria | Firmicutes | Clostridia    | Clostridiales   | Veillonellaceae_IX  | Selenomonas            | Selenomonas_sp._COT_167           |
| ASV931  | Bacteria | Firmicutes | Clostridia    | Clostridiales   | Veillonellaceae_IX  | Selenomonas            | Selenomonas                       |
| ASV1051 | Bacteria | Firmicutes | Clostridia    | Clostridiales   | Veillonellaceae_IX  | Selenomonas            | Selenomonas                       |
| ASV1208 | Bacteria | Firmicutes | Clostridia    | Clostridiales   | Veillonellaceae_IX  | Selenomonas            | Selenomonas                       |
| ASV1280 | Bacteria | Firmicutes | Negativicutes | Selenomonadales | Selenomonadaceae    | Selenomonas            | Selenomonas                       |
| ASV171  | Bacteria | Firmicutes | Clostridia    | Clostridiales   | Veillonellaceae_IX  | Schwartzia             | Schwartzia                        |
| ASV227  | Bacteria | Firmicutes | Clostridia    | Clostridiales   | Veillonellaceae_IX  | Schwartzia             | Schwartzia                        |
| ASV824  | Bacteria | Firmicutes | Clostridia    | Clostridiales   | Veillonellaceae_IX  | Schwartzia             | Schwartzia                        |
| ASV424  | Bacteria | Firmicutes | Negativicutes | Veillonellales  | Veillonellaceae     | Veillonellaceae_[G-1]  | Veillonellaceae_[G-1]             |
| ASV402  | Bacteria | Firmicutes | Negativicutes | Veillonellales  | Veillonellaceae     | Veillonellaceae_[G-1]  | Veillonellaceae_[G-1]             |

|         |          |             |               |                   |                   |                       |                                   |
|---------|----------|-------------|---------------|-------------------|-------------------|-----------------------|-----------------------------------|
| ASV435  | Bacteria | Firmicutes  | Negativicutes | Veillonellales    | Veillonellaceae   | Veillonellaceae_[G-1] | Veillonellaceae_[G-1]             |
| ASV656  | Bacteria | Firmicutes  | Negativicutes | Veillonellales    | Veillonellaceae   | Veillonellaceae_[G-1] | Veillonellaceae_[G-1]             |
| ASV802  | Bacteria | Firmicutes  | Negativicutes | Veillonellales    | Veillonellaceae   | Veillonellaceae_[G-1] | Veillonellaceae_[G-1]             |
| ASV1104 | Bacteria | Firmicutes  | Negativicutes | Veillonellales    | Veillonellaceae   | Veillonellaceae_[G-1] | Veillonellaceae_[G-1]             |
| ASV323  | Bacteria | Tenericutes | Mollicutes    | Acholeplasmatales | Acholeplasmatales | Acholeplasmatales_G-4 | Acholeplasmatales_G-4_sp._COT_316 |
| ASV1269 | Bacteria | Tenericutes | Mollicutes    | Acholeplasmatales | Acholeplasmatales | Acholeplasmatales_G-4 | Acholeplasmatales_G-4             |
| ASV1695 | Bacteria | Tenericutes | Mollicutes    | Acholeplasmatales | Acholeplasmatales | Acholeplasmatales_G-4 | Acholeplasmatales_G-4             |
| ASV860  | Bacteria | Tenericutes | Mollicutes    | Acholeplasmatales | Acholeplasmatales | Acholeplasmatales_G-3 | Acholeplasmatales_G-3_sp._COT_375 |
| ASV1418 | Bacteria | Tenericutes | Mollicutes    | Acholeplasmatales | Acholeplasmatales | Acholeplasmatales_G-3 | Acholeplasmatales_G-3             |
| ASV1559 | Bacteria | Tenericutes | Mollicutes    | Acholeplasmatales | Acholeplasmatales | Acholeplasmatales_G-3 | Acholeplasmatales_G-3             |
| ASV1577 | Bacteria | Tenericutes | Mollicutes    | Acholeplasmatales | Acholeplasmatales | Acholeplasmatales_G-4 | Acholeplasmatales_G-4             |
| ASV624  | Bacteria | Tenericutes | Mollicutes    | Acholeplasmatales | Acholeplasmatales | Acholeplasmatales_G-4 | Acholeplasmatales_G-4             |
| ASV1639 | Bacteria | Tenericutes | Mollicutes    | Acholeplasmatales | Acholeplasmatales | Acholeplasmatales_G-4 | Acholeplasmatales_G-4             |
| ASV454  | Bacteria | Firmicutes  | Mollicutes    | Mollicutes_[O-2]  | Mollicutes_[F-2]  | Mollicutes_[G-2]      | Mollicutes_[G-2]                  |
| ASV872  | Bacteria | Firmicutes  | Mollicutes    | Mollicutes_[O-2]  | Mollicutes_[F-2]  | Mollicutes_[G-2]      | Mollicutes_[G-2]                  |
| ASV209  | Bacteria | Firmicutes  | Mollicutes    | Mollicutes_[O-1]  | Mollicutes_[F-1]  | Mollicutes_[G-1]      | Mollicutes_[G-1]                  |
| ASV105  | Bacteria | Tenericutes | Mollicutes    | Acholeplasmatales | Acholeplasmatales | Acholeplasmatales_G-1 | Acholeplasmatales_G-1_sp._COT_256 |
| ASV456  | Bacteria | Tenericutes | Mollicutes    | Acholeplasmatales | Acholeplasmatales | Acholeplasmatales_G-2 | Acholeplasmatales_G-2             |

|         |          |             |                  |                    |                     |                       |                          |
|---------|----------|-------------|------------------|--------------------|---------------------|-----------------------|--------------------------|
| ASV1483 | Bacteria | Tenericutes | Mollicutes       | Acholeplasmatales  | Acholeplasmatales   | Acholeplasmatales_G-2 | Acholeplasmatales_G-2    |
| ASV1220 | Bacteria | Tenericutes | Mollicutes       | Acholeplasmatales  | Acholeplasmatales   | Acholeplasmatales_G-2 | Acholeplasmatales_G-2    |
| ASV1036 | Bacteria | Tenericutes | Mollicutes       | Acholeplasmatales  | Acholeplasmatales   | Acholeplasmatales_G-2 | Acholeplasmatales_G-2    |
| ASV1513 | Bacteria | Tenericutes | Mollicutes       | Acholeplasmatales  | Acholeplasmatales   | Acholeplasmatales_G-2 | Acholeplasmatales_G-2    |
| ASV1161 | Bacteria | Tenericutes | Mollicutes       | Acholeplasmatales  | Acholeplasmatales   | Acholeplasmatales_G-2 | Acholeplasmatales_G-2    |
| ASV1400 | Bacteria | Tenericutes | Mollicutes       | Acholeplasmatales  | Acholeplasmatales   | Acholeplasmatales_G-2 | Acholeplasmatales_G-2    |
| ASV1489 | Bacteria | Tenericutes | Mollicutes       | Acholeplasmatales  | Acholeplasmatales   | Acholeplasmatales_G-2 | Acholeplasmatales_G-2    |
| ASV1493 | Bacteria | Tenericutes | Mollicutes       | Acholeplasmatales  | Acholeplasmatales   | Acholeplasmatales_G-2 | Acholeplasmatales_G-2    |
| ASV1673 | Bacteria | Bacteria    | Bacteria         | Bacteria           | Bacteria            | Bacteria              | Bacteria                 |
| ASV1066 | Bacteria | Firmicutes  | Erysipelotrichia | Erysipelotrichales | Erysipelotrichaceae | Allobaculum           | Allobaculum              |
| ASV1258 | Bacteria | Firmicutes  | Erysipelotrichia | Erysipelotrichales | Erysipelotrichaceae | Allobaculum           | Allobaculum              |
| ASV1466 | Bacteria | Firmicutes  | Erysipelotrichia | Erysipelotrichales | Erysipelotrichaceae | Allobaculum           | Allobaculum              |
| ASV1646 | Bacteria | Firmicutes  | Erysipelotrichia | Erysipelotrichales | Erysipelotrichaceae | Allobaculum           | Allobaculum_stercoricans |
| ASV960  | Bacteria | Firmicutes  | Erysipelotrichia | Erysipelotrichales | Erysipelotrichaceae | Allobaculum           | Allobaculum              |
| ASV1226 | Bacteria | Firmicutes  | Erysipelotrichia | Erysipelotrichales | Erysipelotrichaceae | Allobaculum           | Allobaculum              |
| ASV1390 | Bacteria | Firmicutes  | Erysipelotrichia | Erysipelotrichales | Erysipelotrichaceae | Allobaculum           | Allobaculum              |
| ASV1342 | Bacteria | Firmicutes  | Erysipelotrichia | Erysipelotrichales | Erysipelotrichaceae | Holdemanella          | Holdemanella             |

|         |          |              |                      |                    |                     |                             |                                         |
|---------|----------|--------------|----------------------|--------------------|---------------------|-----------------------------|-----------------------------------------|
| ASV1246 | Bacteria | Firmicutes   | Erysipelotric<br>hia | Erysipelotrichales | Erysipelotrichaceae | Erysipelotrichace<br>ae     | Erysipelotrichaceae                     |
| ASV1360 | Bacteria | Firmicutes   | Erysipelotric<br>hia | Erysipelotrichales | Erysipelotrichaceae | Erysipelotrichace<br>ae     | Erysipelotrichaceae                     |
| ASV196  | Bacteria | Firmicutes   | Erysipelotric<br>hia | Erysipelotrichales | Erysipelotrichaceae | Erysipelotrichace<br>ae     | Erysipelotrichaceae                     |
| ASV1190 | Bacteria | Bacteria     | Bacteria             | Bacteria           | Bacteria            | Bacteria                    | Bacteria                                |
| ASV1031 | Bacteria | Bacteria     | Bacteria             | Bacteria           | Bacteria            | Bacteria                    | Bacteria                                |
| ASV1642 | Bacteria | Bacteria     | Bacteria             | Bacteria           | Bacteria            | Bacteria                    | Bacteria                                |
| ASV700  | Bacteria | Firmicutes   | Erysipelotric<br>hia | Erysipelotrichales | Erysipelotrichaceae | Erysipelotrichace<br>ae_G-4 | Erysipelotrichaceae_G-<br>4_sp._COT_381 |
| ASV917  | Bacteria | Firmicutes   | Erysipelotric<br>hia | Erysipelotrichales | Erysipelotrichaceae | Erysipelotrichace<br>ae     | Erysipelotrichaceae                     |
| ASV1264 | Bacteria | Firmicutes   | Erysipelotric<br>hia | Erysipelotrichales | Erysipelotrichaceae | Erysipelotrichace<br>ae_G-2 | Erysipelotrichaceae_G-2                 |
| ASV589  | Bacteria | Firmicutes   | Erysipelotric<br>hia | Erysipelotrichales | Erysipelotrichaceae | Erysipelotrichace<br>ae_G-2 | Erysipelotrichaceae_G-2                 |
| ASV166  | Bacteria | Firmicutes   | Erysipelotric<br>hia | Erysipelotrichales | Erysipelotrichaceae | Erysipelotrichace<br>ae_G-1 | Erysipelotrichaceae_G-<br>1_sp._COT_311 |
| ASV1259 | Bacteria | Firmicutes   | Erysipelotric<br>hia | Erysipelotrichales | Erysipelotrichaceae | Erysipelotrichace<br>ae_G-1 | Erysipelotrichaceae_G-1                 |
| ASV334  | Bacteria | Firmicutes   | Erysipelotric<br>hia | Erysipelotrichales | Erysipelotrichaceae | Erysipelotrichace<br>ae_G-3 | Erysipelotrichaceae_G-3                 |
| ASV1237 | Bacteria | Firmicutes   | Erysipelotric<br>hia | Erysipelotrichales | Erysipelotrichaceae | Erysipelotrichace<br>ae_G-3 | Erysipelotrichaceae_G-<br>3_sp._COT_302 |
| ASV645  | Bacteria | Tenericutes  | Mollicutes           | Mycoplasmatales    | Mycoplasmataceae    | Ureaplasma                  | Ureaplasma                              |
| ASV1477 | Bacteria | Tenericutes  | Mollicutes           | Mycoplasmatales    | Mycoplasmataceae    | Ureaplasma                  | Ureaplasma                              |
| ASV1295 | Bacteria | Chloroflexi  | Anaerolineae         | Anaerolineales     | Anaerolineaceae     | Levilinea                   | Levilinea                               |
| ASV1728 | Bacteria | Chloroflexi  | Anaerolineae         | Anaerolineales     | Anaerolineaceae     | Chloroflexi_G-1             | Chloroflexi_G-<br>1_sp._COT_306         |
| ASV712  | Bacteria | Fusobacteria | Fusobacteriia        | Fusobacteriales    | Fusobacteriaceae    | Fusobacterium               | Fusobacterium                           |
| ASV869  | Bacteria | Fusobacteria | Fusobacteriia        | Fusobacteriales    | Fusobacteriaceae    | Fusobacterium               | Fusobacterium                           |
| ASV153  | Bacteria | Fusobacteria | Fusobacteriia        | Fusobacteriales    | Fusobacteriaceae    | Fusobacterium               | Fusobacterium                           |





|         |          |              |               |                 |                  |                 |                             |
|---------|----------|--------------|---------------|-----------------|------------------|-----------------|-----------------------------|
| ASV224  | Bacteria | Fusobacteria | Fusobacteriia | Fusobacteriales | Fusobacteriaceae | Fusobacterium   | Fusobacterium               |
| ASV1689 | Bacteria | Fusobacteria | Fusobacteriia | Fusobacteriales | Fusobacteriaceae | Fusobacterium   | Fusobacterium               |
| ASV516  | Bacteria | Fusobacteria | Fusobacteriia | Fusobacteriales | Fusobacteriaceae | Fusobacterium   | Fusobacterium               |
| ASV1266 | Bacteria | Fusobacteria | Fusobacteriia | Fusobacteriales | Fusobacteriaceae | Fusobacterium   | Fusobacterium               |
| ASV856  | Bacteria | Fusobacteria | Fusobacteriia | Fusobacteriales | Fusobacteriaceae | Fusobacterium   | Fusobacterium               |
| ASV821  | Bacteria | Fusobacteria | Fusobacteriia | Fusobacteriales | Fusobacteriaceae | Fusobacterium   | Fusobacterium               |
| ASV1619 | Bacteria | Fusobacteria | Fusobacteriia | Fusobacteriales | Fusobacteriaceae | Fusobacterium   | Fusobacterium_necrophorum   |
| ASV581  | Bacteria | Fusobacteria | Fusobacteriia | Fusobacteriales | Fusobacteriaceae | Fusobacterium   | Fusobacterium               |
| ASV236  | Bacteria | Fusobacteria | Fusobacteriia | Fusobacteriales | Fusobacteriaceae | Fusobacterium   | Fusobacterium               |
| ASV687  | Bacteria | Fusobacteria | Fusobacteriia | Fusobacteriales | Fusobacteriaceae | Fusobacterium   | Fusobacterium               |
| ASV807  | Bacteria | Fusobacteria | Fusobacteriia | Fusobacteriales | Fusobacteriaceae | Cetobacterium   | Cetobacterium               |
| ASV786  | Bacteria | Fusobacteria | Fusobacteriia | Fusobacteriales | Fusobacteriaceae | Fusobacterium   | Fusobacterium               |
| ASV1680 | Bacteria | Fusobacteria | Fusobacteriia | Fusobacteriales | Fusobacteriaceae | Fusobacterium   | Fusobacterium               |
| ASV1544 | Bacteria | Fusobacteria | Fusobacteriia | Fusobacteriales | Fusobacteriaceae | Cetobacterium   | Cetobacterium               |
| ASV1653 | Bacteria | Fusobacteria | Fusobacteriia | Fusobacteriales | Fusobacteriaceae | Cetobacterium   | Cetobacterium               |
| ASV1275 | Bacteria | Fusobacteria | Fusobacteriia | Fusobacteriales | Leptotrichiaceae | Leptotrichia    | Leptotrichia                |
| ASV1590 | Bacteria | Fusobacteria | Fusobacteriia | Fusobacteriales | Leptotrichiaceae | Leptotrichia    | Leptotrichia                |
| ASV679  | Bacteria | Fusobacteria | Fusobacteriia | Fusobacteriales | Fusobacteriaceae | Leptotrichia    | Leptotrichia                |
| ASV1540 | Bacteria | Fusobacteria | Fusobacteriia | Fusobacteriales | Fusobacteriaceae | Leptotrichia    | Leptotrichia                |
| ASV314  | Bacteria | Fusobacteria | Fusobacteriia | Fusobacteriales | Fusobacteriaceae | Leptotrichia    | Leptotrichia_sp._COT_345    |
| ASV1348 | Bacteria | Fusobacteria | Fusobacteriia | Fusobacteriales | Fusobacteriaceae | Leptotrichia    | Leptotrichia                |
| ASV519  | Bacteria | Fusobacteria | Fusobacteriia | Fusobacteriales | Fusobacteriaceae | Leptotrichia    | Leptotrichia                |
| ASV1655 | Bacteria | Fusobacteria | Fusobacteriia | Fusobacteriales | Leptotrichiaceae | Streptobacillus | Streptobacillus             |
| ASV277  | Bacteria | Fusobacteria | Fusobacteriia | Fusobacteriales | Leptotrichiaceae | Streptobacillus | Streptobacillus_sp._COT_370 |
| ASV894  | Bacteria | Fusobacteria | Fusobacteriia | Fusobacteriales | Leptotrichiaceae | Streptobacillus | Streptobacillus             |
| ASV347  | Bacteria | Fusobacteria | Fusobacteriia | Fusobacteriales | Leptotrichiaceae | Streptobacillus | Streptobacillus             |
| ASV239  | Bacteria | Fusobacteria | Fusobacteriia | Fusobacteriales | Fusobacteriales  | Fusobacteriales | Fusobacteriales             |



|         |          |                |                         |                         |                     |                         |                              |
|---------|----------|----------------|-------------------------|-------------------------|---------------------|-------------------------|------------------------------|
| ASV978  | Bacteria | Proteobacteria | Alphaproteo<br>bacteria | Rhodospirillales        | Rhodospirillales    | Rhodospirillales        | Rhodospirillales             |
| ASV1678 | Bacteria | Proteobacteria | Alphaproteo<br>bacteria | Rhodospirillales        | Rhodospirillaceae   | Rhodospirillaceae       | Rhodospirillaceae            |
| ASV1640 | Bacteria | Proteobacteria | Alphaproteo<br>bacteria | Rhodospirillales        | Rhodospirillales    | Rhodospirillales        | Rhodospirillales             |
| ASV1675 | Bacteria | Proteobacteria | Alphaproteo<br>bacteria | Alphaproteobacte<br>ria | Alphaproteobacteria | Alphaproteobacte<br>ria | Alphaproteobacteria          |
| ASV584  | Bacteria | Proteobacteria | Proteobacteri<br>a      | Proteobacteria          | Proteobacteria      | Proteobacteria          | Proteobacteria               |
| ASV564  | Bacteria | Proteobacteria | Proteobacteri<br>a      | Proteobacteria          | Proteobacteria      | Proteobacteria          | Proteobacteria               |
| ASV1479 | Bacteria | Proteobacteria | Proteobacteri<br>a      | Proteobacteria          | Proteobacteria      | Proteobacteria          | Proteobacteria               |
| ASV1511 | Bacteria | Proteobacteria | Alphaproteo<br>bacteria | Sphingomonadale<br>s    | Sphingomonadaceae   | Sphingobium             | Sphingobium                  |
| ASV1644 | Bacteria | Proteobacteria | Alphaproteo<br>bacteria | Sphingomonadale<br>s    | Sphingomonadaceae   | Sphingomonas            | Sphingomonas_dokdonen<br>sis |
| ASV1286 | Bacteria | Proteobacteria | Alphaproteo<br>bacteria | Rhizobiales             | Bradyrhizobiaceae   | Bosea                   | Bosea                        |
| ASV1558 | Bacteria | Proteobacteria | Alphaproteo<br>bacteria | Rhizobiales             | Bradyrhizobiaceae   | Bradyrhizobium          | Bradyrhizobium               |
| ASV1488 | Bacteria | Proteobacteria | Alphaproteo<br>bacteria | Rhizobiales             | Brucellaceae        | Ochrobactrum            | Ochrobactrum                 |
| ASV1734 | Bacteria | Proteobacteria | Alphaproteo<br>bacteria | Caulobacterales         | Caulobacteraceae    | Caulobacter             | Caulobacter                  |
| ASV13   | Bacteria | Chlorobi       | Chlorobi_C-<br>1        | Chlorobi_O-1            | Chlorobi_F-1        | Chlorobi_G-1            | Chlorobi_G-<br>1_sp._COT_046 |
| ASV815  | Bacteria | Chlorobi       | Chlorobi_C-<br>1        | Chlorobi_O-1            | Chlorobi_F-1        | Chlorobi_G-1            | Chlorobi_G-1                 |
| ASV228  | Bacteria | Chlorobi       | Chlorobi_C-<br>1        | Chlorobi_O-1            | Chlorobi_F-1        | Chlorobi_G-1            | Chlorobi_G-1                 |
| ASV40   | Bacteria | Chlorobi       | Chlorobi_C-<br>1        | Chlorobi_O-1            | Chlorobi_F-1        | Chlorobi_G-1            | Chlorobi_G-1                 |

|         |          |                |                     |                  |                   |                   |                              |
|---------|----------|----------------|---------------------|------------------|-------------------|-------------------|------------------------------|
| ASV157  | Bacteria | Chlorobi       | Chlorobi_C-1        | Chlorobi_O-1     | Chlorobi_F-1      | Chlorobi_G-1      | Chlorobi_G-1_sp._COT_046     |
| ASV857  | Bacteria | Chlorobi       | Chlorobi_C-1        | Chlorobi_O-1     | Chlorobi_F-1      | Chlorobi_G-1      | Chlorobi_G-1                 |
| ASV563  | Bacteria | Chlorobi       | Chlorobi_C-1        | Chlorobi_O-1     | Chlorobi_F-1      | Chlorobi_G-1      | Chlorobi_G-1                 |
| ASV966  | Bacteria | Chlorobi       | Chlorobi_C-1        | Chlorobi_O-1     | Chlorobi_F-1      | Chlorobi_G-1      | Chlorobi_G-1                 |
| ASV1061 | Bacteria | Chlorobi       | Chlorobi_C-1        | Chlorobi_O-1     | Chlorobi_F-1      | Chlorobi_G-1      | Chlorobi_G-1                 |
| ASV101  | Bacteria | Chlorobi       | Chlorobi_C-1        | Chlorobi_O-1     | Chlorobi_F-1      | Chlorobi_G-1      | Chlorobi_G-1                 |
| ASV109  | Bacteria | Chlorobi       | Chlorobi_C-1        | Chlorobi_O-1     | Chlorobi_F-1      | Chlorobi_G-1      | Chlorobi_G-1_sp._COT_312     |
| ASV604  | Bacteria | Chlorobi       | Chlorobi_C-1        | Chlorobi_O-1     | Chlorobi_F-1      | Chlorobi_G-1      | Chlorobi_G-1                 |
| ASV1142 | Bacteria | Chlorobi       | Chlorobi_C-1        | Chlorobi_O-1     | Chlorobi_F-1      | Chlorobi_G-1      | Chlorobi_G-1                 |
| ASV1423 | Bacteria | Chlorobi       | Chlorobi_C-1        | Chlorobi_O-1     | Chlorobi_F-1      | Chlorobi_G-1      | Chlorobi_G-1                 |
| ASV1435 | Bacteria | Chlorobi       | Chlorobi_C-1        | Chlorobi_O-1     | Chlorobi_F-1      | Chlorobi_G-1      | Chlorobi_G-1                 |
| ASV1626 | Bacteria | Chlorobi       | Chlorobi_C-1        | Chlorobi_O-1     | Chlorobi_F-1      | Chlorobi_G-1      | Chlorobi_G-1                 |
| ASV1693 | Bacteria | Chlorobi       | Chlorobi_C-1        | Chlorobi_O-1     | Chlorobi_F-1      | Chlorobi_G-1      | Chlorobi_G-1                 |
| ASV1748 | Bacteria | Bacteroidetes  | Flavobacteriia      | Flavobacteriales | Flavobacteriaceae | Flavobacteriaceae | Flavobacteriaceae            |
| ASV785  | Bacteria | Proteobacteria | Gammaproteobacteria | Xanthomonadales  | Xanthomonadaceae  | Stenotrophomonas  | Stenotrophomonas             |
| ASV927  | Bacteria | Proteobacteria | Gammaproteobacteria | Xanthomonadales  | Xanthomonadaceae  | Stenotrophomonas  | Stenotrophomonas             |
| ASV326  | Bacteria | Proteobacteria | Gammaproteobacteria | Xanthomonadales  | Xanthomonadaceae  | Stenotrophomonas  | Stenotrophomonas_sp._COT_224 |

|         |          |                |                     |                 |                  |                  |                        |
|---------|----------|----------------|---------------------|-----------------|------------------|------------------|------------------------|
| ASV89   | Bacteria | Proteobacteria | Gammaproteobacteria | Xanthomonadales | Xanthomonadaceae | Stenotrophomonas | Stenotrophomonas       |
| ASV759  | Bacteria | Proteobacteria | Gammaproteobacteria | Xanthomonadales | Xanthomonadaceae | Xanthomonadaceae | Xanthomonadaceae       |
| ASV1609 | Bacteria | Proteobacteria | Gammaproteobacteria | Xanthomonadales | Xanthomonadaceae | Luteimonas       | Luteimonas             |
| ASV634  | Bacteria | Proteobacteria | Gammaproteobacteria | Xanthomonadales | Xanthomonadaceae | Luteimonas       | Luteimonas_sp._COT_275 |
| ASV229  | Bacteria | Proteobacteria | Gammaproteobacteria | Xanthomonadales | Xanthomonadaceae | Xanthomonadaceae | Xanthomonadaceae       |
| ASV279  | Bacteria | Proteobacteria | Gammaproteobacteria | Xanthomonadales | Xanthomonadaceae | Xanthomonadaceae | Xanthomonadaceae       |
| ASV159  | Bacteria | Proteobacteria | Betaproteobacteria  | Burkholderiales | Comamonadaceae   | Xenophilus       | Xenophilus             |
| ASV223  | Bacteria | Proteobacteria | Betaproteobacteria  | Burkholderiales | Comamonadaceae   | Xenophilus       | Xenophilus             |
| ASV64   | Bacteria | Proteobacteria | Betaproteobacteria  | Burkholderiales | Comamonadaceae   | Xenophilus       | Xenophilus             |
| ASV158  | Bacteria | Proteobacteria | Betaproteobacteria  | Burkholderiales | Comamonadaceae   | Xenophilus       | Xenophilus             |
| ASV373  | Bacteria | Proteobacteria | Betaproteobacteria  | Burkholderiales | Comamonadaceae   | Xenophilus       | Xenophilus             |
| ASV317  | Bacteria | Proteobacteria | Betaproteobacteria  | Burkholderiales | Comamonadaceae   | Xenophilus       | Xenophilus_sp._COT_264 |
| ASV739  | Bacteria | Proteobacteria | Betaproteobacteria  | Burkholderiales | Comamonadaceae   | Xenophilus       | Xenophilus             |
| ASV176  | Bacteria | Proteobacteria | Betaproteobacteria  | Burkholderiales | Comamonadaceae   | Xenophilus       | Xenophilus             |
| ASV1118 | Bacteria | Proteobacteria | Betaproteobacteria  | Burkholderiales | Comamonadaceae   | Xenophilus       | Xenophilus             |
| ASV906  | Bacteria | Proteobacteria | Betaproteobacteria  | Burkholderiales | Comamonadaceae   | Xenophilus       | Xenophilus             |
| ASV116  | Bacteria | Proteobacteria | Betaproteobacteria  | Burkholderiales | Comamonadaceae   | Xenophilus       | Xenophilus             |

|         |          |                |                    |                 |                 |                 |                 |
|---------|----------|----------------|--------------------|-----------------|-----------------|-----------------|-----------------|
| ASV666  | Bacteria | Proteobacteria | Betaproteobacteria | Burkholderiales | Comamonadaceae  | Xenophilus      | Xenophilus      |
| ASV1013 | Bacteria | Proteobacteria | Betaproteobacteria | Burkholderiales | Comamonadaceae  | Xenophilus      | Xenophilus      |
| ASV1180 | Bacteria | Proteobacteria | Betaproteobacteria | Burkholderiales | Comamonadaceae  | Xenophilus      | Xenophilus      |
| ASV1568 | Bacteria | Proteobacteria | Betaproteobacteria | Burkholderiales | Comamonadaceae  | Xenophilus      | Xenophilus      |
| ASV1701 | Bacteria | Proteobacteria | Betaproteobacteria | Burkholderiales | Comamonadaceae  | Comamonadaceae  | Comamonadaceae  |
| ASV1705 | Bacteria | Proteobacteria | Betaproteobacteria | Burkholderiales | Comamonadaceae  | Comamonadaceae  | Comamonadaceae  |
| ASV1741 | Bacteria | Proteobacteria | Betaproteobacteria | Burkholderiales | Burkholderiales | Burkholderiales | Burkholderiales |
| ASV1612 | Bacteria | Proteobacteria | Betaproteobacteria | Burkholderiales | Comamonadaceae  | Xenophilus      | Xenophilus      |
| ASV1624 | Bacteria | Proteobacteria | Betaproteobacteria | Burkholderiales | Comamonadaceae  | Xenophilus      | Xenophilus      |
| ASV1063 | Bacteria | Proteobacteria | Betaproteobacteria | Burkholderiales | Comamonadaceae  | Ottowia         | Ottowia         |
| ASV1535 | Bacteria | Proteobacteria | Betaproteobacteria | Burkholderiales | Comamonadaceae  | Ottowia         | Ottowia         |
| ASV593  | Bacteria | Proteobacteria | Betaproteobacteria | Burkholderiales | Comamonadaceae  | Ottowia         | Ottowia         |
| ASV1432 | Bacteria | Proteobacteria | Betaproteobacteria | Burkholderiales | Comamonadaceae  | Xenophilus      | Xenophilus      |
| ASV132  | Bacteria | Proteobacteria | Betaproteobacteria | Burkholderiales | Comamonadaceae  | Ottowia         | Ottowia         |
| ASV452  | Bacteria | Proteobacteria | Betaproteobacteria | Burkholderiales | Comamonadaceae  | Ottowia         | Ottowia         |
| ASV799  | Bacteria | Proteobacteria | Betaproteobacteria | Burkholderiales | Comamonadaceae  | Ottowia         | Ottowia         |
| ASV920  | Bacteria | Proteobacteria | Betaproteobacteria | Burkholderiales | Comamonadaceae  | Ottowia         | Ottowia         |

|         |          |                |                    |                 |                |                |                         |
|---------|----------|----------------|--------------------|-----------------|----------------|----------------|-------------------------|
| ASV1151 | Bacteria | Proteobacteria | Betaproteobacteria | Burkholderiales | Comamonadaceae | Ottowia        | Ottowia                 |
| ASV1074 | Bacteria | Proteobacteria | Betaproteobacteria | Burkholderiales | Comamonadaceae | Brachymonas    | Brachymonas             |
| ASV1111 | Bacteria | Proteobacteria | Betaproteobacteria | Burkholderiales | Comamonadaceae | Comamonadaceae | Comamonadaceae          |
| ASV1555 | Bacteria | Proteobacteria | Betaproteobacteria | Burkholderiales | Comamonadaceae | Ottowia        | Ottowia                 |
| ASV1503 | Bacteria | Proteobacteria | Betaproteobacteria | Burkholderiales | Comamonadaceae | Comamonas      | Comamonas               |
| ASV16   | Bacteria | Proteobacteria | Betaproteobacteria | Burkholderiales | Comamonadaceae | Comamonas      | Comamonas_sp._COT_270   |
| ASV1387 | Bacteria | Proteobacteria | Betaproteobacteria | Burkholderiales | Comamonadaceae | Brachymonas    | Brachymonas             |
| ASV262  | Bacteria | Proteobacteria | Betaproteobacteria | Burkholderiales | Comamonadaceae | Brachymonas    | Brachymonas             |
| ASV361  | Bacteria | Proteobacteria | Betaproteobacteria | Burkholderiales | Comamonadaceae | Brachymonas    | Brachymonas             |
| ASV170  | Bacteria | Proteobacteria | Betaproteobacteria | Burkholderiales | Comamonadaceae | Brachymonas    | Brachymonas_sp._COT_015 |
| ASV470  | Bacteria | Proteobacteria | Betaproteobacteria | Burkholderiales | Comamonadaceae | Brachymonas    | Brachymonas             |
| ASV473  | Bacteria | Proteobacteria | Betaproteobacteria | Burkholderiales | Comamonadaceae | Brachymonas    | Brachymonas             |
| ASV1328 | Bacteria | Proteobacteria | Betaproteobacteria | Burkholderiales | Comamonadaceae | Brachymonas    | Brachymonas             |
| ASV1444 | Bacteria | Proteobacteria | Betaproteobacteria | Burkholderiales | Comamonadaceae | Brachymonas    | Brachymonas             |
| ASV772  | Bacteria | Proteobacteria | Betaproteobacteria | Burkholderiales | Comamonadaceae | Brachymonas    | Brachymonas             |
| ASV369  | Bacteria | Proteobacteria | Betaproteobacteria | Burkholderiales | Comamonadaceae | Brachymonas    | Brachymonas             |
| ASV386  | Bacteria | Proteobacteria | Betaproteobacteria | Burkholderiales | Comamonadaceae | Brachymonas    | Brachymonas             |

|         |          |                |                    |                 |                |             |             |
|---------|----------|----------------|--------------------|-----------------|----------------|-------------|-------------|
| ASV1092 | Bacteria | Proteobacteria | Betaproteobacteria | Burkholderiales | Comamonadaceae | Brachymonas | Brachymonas |
| ASV1292 | Bacteria | Proteobacteria | Betaproteobacteria | Burkholderiales | Comamonadaceae | Brachymonas | Brachymonas |
| ASV672  | Bacteria | Proteobacteria | Betaproteobacteria | Burkholderiales | Comamonadaceae | Brachymonas | Brachymonas |
| ASV1004 | Bacteria | Proteobacteria | Betaproteobacteria | Burkholderiales | Comamonadaceae | Brachymonas | Brachymonas |
| ASV727  | Bacteria | Proteobacteria | Betaproteobacteria | Burkholderiales | Comamonadaceae | Brachymonas | Brachymonas |
| ASV1130 | Bacteria | Proteobacteria | Betaproteobacteria | Burkholderiales | Comamonadaceae | Brachymonas | Brachymonas |
| ASV486  | Bacteria | Proteobacteria | Betaproteobacteria | Burkholderiales | Comamonadaceae | Brachymonas | Brachymonas |
| ASV701  | Bacteria | Proteobacteria | Betaproteobacteria | Burkholderiales | Comamonadaceae | Brachymonas | Brachymonas |
| ASV585  | Bacteria | Proteobacteria | Betaproteobacteria | Burkholderiales | Comamonadaceae | Brachymonas | Brachymonas |
| ASV1008 | Bacteria | Proteobacteria | Betaproteobacteria | Burkholderiales | Comamonadaceae | Brachymonas | Brachymonas |
| ASV550  | Bacteria | Proteobacteria | Betaproteobacteria | Burkholderiales | Comamonadaceae | Brachymonas | Brachymonas |
| ASV536  | Bacteria | Proteobacteria | Betaproteobacteria | Burkholderiales | Comamonadaceae | Brachymonas | Brachymonas |
| ASV217  | Bacteria | Proteobacteria | Betaproteobacteria | Burkholderiales | Comamonadaceae | Brachymonas | Brachymonas |
| ASV684  | Bacteria | Proteobacteria | Betaproteobacteria | Burkholderiales | Comamonadaceae | Brachymonas | Brachymonas |
| ASV340  | Bacteria | Proteobacteria | Betaproteobacteria | Burkholderiales | Comamonadaceae | Brachymonas | Brachymonas |
| ASV380  | Bacteria | Proteobacteria | Betaproteobacteria | Burkholderiales | Comamonadaceae | Brachymonas | Brachymonas |
| ASV191  | Bacteria | Proteobacteria | Betaproteobacteria | Burkholderiales | Comamonadaceae | Brachymonas | Brachymonas |



|         |          |                |                    |                 |                  |                |                            |
|---------|----------|----------------|--------------------|-----------------|------------------|----------------|----------------------------|
| ASV417  | Bacteria | Proteobacteria | Betaproteobacteria | Burkholderiales | Comamonadaceae   | Brachymonas    | Brachymonas                |
| ASV1378 | Bacteria | Proteobacteria | Betaproteobacteria | Burkholderiales | Comamonadaceae   | Delftia        | Delftia                    |
| ASV1567 | Bacteria | Proteobacteria | Betaproteobacteria | Burkholderiales | Comamonadaceae   | Brachymonas    | Brachymonas                |
| ASV1175 | Bacteria | Proteobacteria | Betaproteobacteria | Burkholderiales | Sutterellaceae   | Sutterella     | Sutterella                 |
| ASV1385 | Bacteria | Proteobacteria | Betaproteobacteria | Burkholderiales | Sutterellaceae   | Sutterella     | Sutterella_stercoricanis   |
| ASV889  | Bacteria | Proteobacteria | Betaproteobacteria | Burkholderiales | Sutterellaceae   | Parasutterella | Parasutterella             |
| ASV1361 | Bacteria | Proteobacteria | Betaproteobacteria | Burkholderiales | Sutterellaceae   | Parasutterella | Parasutterella             |
| ASV117  | Bacteria | Proteobacteria | Betaproteobacteria | Burkholderiales | Burkholderiaceae | Lautropia      | Lautropia_sp._COT_175      |
| ASV646  | Bacteria | Proteobacteria | Betaproteobacteria | Burkholderiales | Burkholderiaceae | Lautropia      | Lautropia                  |
| ASV606  | Bacteria | Proteobacteria | Betaproteobacteria | Burkholderiales | Burkholderiaceae | Lautropia      | Lautropia_sp._COT_060      |
| ASV1075 | Bacteria | Proteobacteria | Betaproteobacteria | Burkholderiales | Burkholderiaceae | Lautropia      | Lautropia                  |
| ASV1124 | Bacteria | Proteobacteria | Betaproteobacteria | Burkholderiales | Burkholderiaceae | Lautropia      | Lautropia                  |
| ASV1128 | Bacteria | Proteobacteria | Betaproteobacteria | Burkholderiales | Burkholderiaceae | Lautropia      | Lautropia                  |
| ASV1484 | Bacteria | Proteobacteria | Betaproteobacteria | Neisseriales    | Neisseriaceae    | Neisseriaceae  | Neisseriaceae              |
| ASV748  | Bacteria | Proteobacteria | Betaproteobacteria | Rhodocyclales   | Rhodocyclaceae   | Propionivibrio | Propionivibrio             |
| ASV1323 | Bacteria | Proteobacteria | Betaproteobacteria | Rhodocyclales   | Rhodocyclaceae   | Propionivibrio | Propionivibrio             |
| ASV244  | Bacteria | Proteobacteria | Betaproteobacteria | Rhodocyclales   | Rhodocyclaceae   | Propionivibrio | Propionivibrio_sp._COT_223 |

|         |          |                |                     |                 |                  |                     |                            |
|---------|----------|----------------|---------------------|-----------------|------------------|---------------------|----------------------------|
| ASV659  | Bacteria | Proteobacteria | Betaproteobacteria  | Rhodocyclales   | Rhodocyclaceae   | Propionivibrio      | Propionivibrio_sp._COT_223 |
| ASV1660 | Bacteria | Proteobacteria | Betaproteobacteria  | Rhodocyclales   | Rhodocyclaceae   | Propionivibrio      | Propionivibrio             |
| ASV1617 | Bacteria | Proteobacteria | Betaproteobacteria  | Rhodocyclales   | Rhodocyclaceae   | Propionivibrio      | Propionivibrio             |
| ASV1523 | Bacteria | Proteobacteria | Betaproteobacteria  | Burkholderiales | Oxalobacteraceae | Oxalobacter         | Oxalobacter                |
| ASV438  | Bacteria | Proteobacteria | Betaproteobacteria  | Burkholderiales | Alcaligenaceae   | Alcaligenaceae      | Alcaligenaceae             |
| ASV1072 | Bacteria | Proteobacteria | Betaproteobacteria  | Burkholderiales | Alcaligenaceae   | Pelistega           | Pelistega                  |
| ASV156  | Bacteria | Proteobacteria | Betaproteobacteria  | Burkholderiales | Oxalobacteraceae | Pelistega           | Pelistega_sp._COT_267      |
| ASV658  | Bacteria | Proteobacteria | Betaproteobacteria  | Burkholderiales | Oxalobacteraceae | Pelistega           | Pelistega                  |
| ASV823  | Bacteria | Proteobacteria | Gammaproteobacteria | Pasteurellales  | Pasteurellaceae  | Pasteurellaceae_G-1 | Pasteurellaceae_G-1        |
| ASV1123 | Bacteria | Proteobacteria | Gammaproteobacteria | Pasteurellales  | Pasteurellaceae  | Pasteurellaceae_G-1 | Pasteurellaceae_G-1        |
| ASV720  | Bacteria | Proteobacteria | Gammaproteobacteria | Pasteurellales  | Pasteurellaceae  | Pasteurellaceae_G-1 | Pasteurellaceae_G-1        |
| ASV583  | Bacteria | Proteobacteria | Gammaproteobacteria | Pasteurellales  | Pasteurellaceae  | Pasteurellaceae_G-1 | Pasteurellaceae_G-1        |
| ASV1056 | Bacteria | Proteobacteria | Gammaproteobacteria | Pasteurellales  | Pasteurellaceae  | Pasteurellaceae_G-1 | Pasteurellaceae_G-1        |
| ASV537  | Bacteria | Proteobacteria | Gammaproteobacteria | Pasteurellales  | Pasteurellaceae  | Pasteurellaceae_G-1 | Pasteurellaceae_G-1        |
| ASV569  | Bacteria | Proteobacteria | Gammaproteobacteria | Pasteurellales  | Pasteurellaceae  | Pasteurellaceae_G-1 | Pasteurellaceae_G-1        |
| ASV682  | Bacteria | Proteobacteria | Gammaproteobacteria | Pasteurellales  | Pasteurellaceae  | Pasteurellaceae_G-1 | Pasteurellaceae_G-1        |
| ASV1223 | Bacteria | Proteobacteria | Gammaproteobacteria | Pasteurellales  | Pasteurellaceae  | Pasteurellaceae_G-1 | Pasteurellaceae_G-1        |

|         |          |                |                     |                |                 |                     |                                 |
|---------|----------|----------------|---------------------|----------------|-----------------|---------------------|---------------------------------|
| ASV942  | Bacteria | Proteobacteria | Gammaproteobacteria | Pasteurellales | Pasteurellaceae | Pasteurellaceae_G-1 | Pasteurellaceae_G-1             |
| ASV957  | Bacteria | Proteobacteria | Gammaproteobacteria | Pasteurellales | Pasteurellaceae | Pasteurellaceae_G-1 | Pasteurellaceae_G-1             |
| ASV1002 | Bacteria | Proteobacteria | Gammaproteobacteria | Pasteurellales | Pasteurellaceae | Pasteurellaceae_G-1 | Pasteurellaceae_G-1             |
| ASV911  | Bacteria | Proteobacteria | Gammaproteobacteria | Pasteurellales | Pasteurellaceae | Pasteurellaceae_G-1 | Pasteurellaceae_G-1             |
| ASV1284 | Bacteria | Proteobacteria | Gammaproteobacteria | Pasteurellales | Pasteurellaceae | Pasteurellaceae_G-1 | Pasteurellaceae_G-1             |
| ASV479  | Bacteria | Proteobacteria | Gammaproteobacteria | Pasteurellales | Pasteurellaceae | Pasteurellaceae_G-1 | Pasteurellaceae_G-1             |
| ASV940  | Bacteria | Proteobacteria | Gammaproteobacteria | Pasteurellales | Pasteurellaceae | Pasteurellaceae_G-1 | Pasteurellaceae_G-1_sp._COT_272 |
| ASV1452 | Bacteria | Proteobacteria | Gammaproteobacteria | Pasteurellales | Pasteurellaceae | Pasteurellaceae_G-1 | Pasteurellaceae_G-1             |
| ASV617  | Bacteria | Proteobacteria | Gammaproteobacteria | Pasteurellales | Pasteurellaceae | Pasteurellaceae_G-1 | Pasteurellaceae_G-1             |
| ASV560  | Bacteria | Proteobacteria | Gammaproteobacteria | Pasteurellales | Pasteurellaceae | Pasteurellaceae_G-1 | Pasteurellaceae_G-1             |
| ASV543  | Bacteria | Proteobacteria | Gammaproteobacteria | Pasteurellales | Pasteurellaceae | Pasteurellaceae_G-1 | Pasteurellaceae_G-1_sp._COT_326 |
| ASV1207 | Bacteria | Proteobacteria | Gammaproteobacteria | Pasteurellales | Pasteurellaceae | Pasteurellaceae_G-1 | Pasteurellaceae_G-1             |
| ASV867  | Bacteria | Proteobacteria | Gammaproteobacteria | Pasteurellales | Pasteurellaceae | Pasteurellaceae_G-1 | Pasteurellaceae_G-1             |
| ASV474  | Bacteria | Proteobacteria | Gammaproteobacteria | Pasteurellales | Pasteurellaceae | Pasteurellaceae_G-1 | Pasteurellaceae_G-1             |
| ASV941  | Bacteria | Proteobacteria | Gammaproteobacteria | Pasteurellales | Pasteurellaceae | Pasteurellaceae_G-1 | Pasteurellaceae_G-1             |
| ASV1001 | Bacteria | Proteobacteria | Gammaproteobacteria | Pasteurellales | Pasteurellaceae | Pasteurellaceae_G-1 | Pasteurellaceae_G-1             |
| ASV76   | Bacteria | Proteobacteria | Gammaproteobacteria | Pasteurellales | Pasteurellaceae | Pasteurellaceae_G-1 | Pasteurellaceae_G-1_sp._COT_272 |

|         |          |                |                     |                |                 |                     |                     |
|---------|----------|----------------|---------------------|----------------|-----------------|---------------------|---------------------|
| ASV187  | Bacteria | Proteobacteria | Gammaproteobacteria | Pasteurellales | Pasteurellaceae | Pasteurellaceae_G-1 | Pasteurellaceae_G-1 |
| ASV270  | Bacteria | Proteobacteria | Gammaproteobacteria | Pasteurellales | Pasteurellaceae | Pasteurellaceae_G-1 | Pasteurellaceae_G-1 |
| ASV289  | Bacteria | Proteobacteria | Gammaproteobacteria | Pasteurellales | Pasteurellaceae | Pasteurellaceae_G-1 | Pasteurellaceae_G-1 |
| ASV348  | Bacteria | Proteobacteria | Gammaproteobacteria | Pasteurellales | Pasteurellaceae | Pasteurellaceae_G-1 | Pasteurellaceae_G-1 |
| ASV467  | Bacteria | Proteobacteria | Gammaproteobacteria | Pasteurellales | Pasteurellaceae | Pasteurellaceae_G-1 | Pasteurellaceae_G-1 |
| ASV1560 | Bacteria | Proteobacteria | Gammaproteobacteria | Pasteurellales | Pasteurellaceae | Pasteurella         | Pasteurella         |
| ASV70   | Bacteria | Proteobacteria | Gammaproteobacteria | Pasteurellales | Pasteurellaceae | Pasteurella         | Pasteurella_canis   |
| ASV517  | Bacteria | Proteobacteria | Gammaproteobacteria | Pasteurellales | Pasteurellaceae | Pasteurella         | Pasteurella         |
| ASV124  | Bacteria | Proteobacteria | Gammaproteobacteria | Pasteurellales | Pasteurellaceae | Pasteurella         | Pasteurella         |
| ASV17   | Bacteria | Proteobacteria | Gammaproteobacteria | Pasteurellales | Pasteurellaceae | Pasteurella         | Pasteurella         |
| ASV272  | Bacteria | Proteobacteria | Gammaproteobacteria | Pasteurellales | Pasteurellaceae | Pasteurella         | Pasteurella         |
| ASV1584 | Bacteria | Proteobacteria | Gammaproteobacteria | Pasteurellales | Pasteurellaceae | Pasteurellaceae_G-2 | Pasteurellaceae_G-2 |
| ASV110  | Bacteria | Proteobacteria | Gammaproteobacteria | Pasteurellales | Pasteurellaceae | Pasteurellaceae_G-2 | Pasteurellaceae_G-2 |
| ASV79   | Bacteria | Proteobacteria | Gammaproteobacteria | Pasteurellales | Pasteurellaceae | Pasteurellaceae_G-2 | Pasteurellaceae_G-2 |
| ASV1098 | Bacteria | Proteobacteria | Gammaproteobacteria | Pasteurellales | Pasteurellaceae | Pasteurellaceae     | Pasteurellaceae     |
| ASV342  | Bacteria | Proteobacteria | Gammaproteobacteria | Pasteurellales | Pasteurellaceae | Pasteurellaceae_G-2 | Pasteurellaceae_G-2 |
| ASV482  | Bacteria | Proteobacteria | Gammaproteobacteria | Pasteurellales | Pasteurellaceae | Pasteurellaceae_G-2 | Pasteurellaceae_G-2 |

|         |          |                |                     |                |                 |                     |                                 |
|---------|----------|----------------|---------------------|----------------|-----------------|---------------------|---------------------------------|
| ASV311  | Bacteria | Proteobacteria | Gammaproteobacteria | Pasteurellales | Pasteurellaceae | Pasteurellaceae_G-2 | Pasteurellaceae_G-2             |
| ASV818  | Bacteria | Proteobacteria | Gammaproteobacteria | Pasteurellales | Pasteurellaceae | Pasteurellaceae_G-2 | Pasteurellaceae_G-2             |
| ASV775  | Bacteria | Proteobacteria | Gammaproteobacteria | Pasteurellales | Pasteurellaceae | Pasteurellaceae_G-2 | Pasteurellaceae_G-2             |
| ASV795  | Bacteria | Proteobacteria | Gammaproteobacteria | Pasteurellales | Pasteurellaceae | Pasteurellaceae_G-2 | Pasteurellaceae_G-2             |
| ASV615  | Bacteria | Proteobacteria | Gammaproteobacteria | Pasteurellales | Pasteurellaceae | Pasteurellaceae_G-2 | Pasteurellaceae_G-2             |
| ASV830  | Bacteria | Proteobacteria | Gammaproteobacteria | Pasteurellales | Pasteurellaceae | Pasteurellaceae_G-2 | Pasteurellaceae_G-2             |
| ASV915  | Bacteria | Proteobacteria | Gammaproteobacteria | Pasteurellales | Pasteurellaceae | Pasteurellaceae_G-2 | Pasteurellaceae_G-2             |
| ASV637  | Bacteria | Proteobacteria | Gammaproteobacteria | Pasteurellales | Pasteurellaceae | Pasteurellaceae_G-2 | Pasteurellaceae_G-2_sp._COT_271 |
| ASV174  | Bacteria | Proteobacteria | Gammaproteobacteria | Pasteurellales | Pasteurellaceae | Pasteurellaceae_G-2 | Pasteurellaceae_G-2             |
| ASV1090 | Bacteria | Proteobacteria | Gammaproteobacteria | Pasteurellales | Pasteurellaceae | Pasteurellaceae_G-2 | Pasteurellaceae_G-2             |
| ASV661  | Bacteria | Proteobacteria | Gammaproteobacteria | Pasteurellales | Pasteurellaceae | Pasteurellaceae_G-2 | Pasteurellaceae_G-2             |
| ASV971  | Bacteria | Proteobacteria | Gammaproteobacteria | Pasteurellales | Pasteurellaceae | Pasteurellaceae_G-2 | Pasteurellaceae_G-2             |
| ASV360  | Bacteria | Proteobacteria | Gammaproteobacteria | Pasteurellales | Pasteurellaceae | Pasteurellaceae_G-2 | Pasteurellaceae_G-2             |
| ASV46   | Bacteria | Proteobacteria | Gammaproteobacteria | Pasteurellales | Pasteurellaceae | Pasteurellaceae_G-2 | Pasteurellaceae_G-2             |
| ASV154  | Bacteria | Proteobacteria | Gammaproteobacteria | Pasteurellales | Pasteurellaceae | Pasteurellaceae_G-2 | Pasteurellaceae_G-2             |
| ASV214  | Bacteria | Proteobacteria | Gammaproteobacteria | Pasteurellales | Pasteurellaceae | Pasteurellaceae_G-2 | Pasteurellaceae_G-2             |
| ASV463  | Bacteria | Proteobacteria | Gammaproteobacteria | Pasteurellales | Pasteurellaceae | Pasteurellaceae_G-2 | Pasteurellaceae_G-2             |

|         |          |                |                     |                   |                     |                      |                             |
|---------|----------|----------------|---------------------|-------------------|---------------------|----------------------|-----------------------------|
| ASV518  | Bacteria | Proteobacteria | Gammaproteobacteria | Pasteurellales    | Pasteurellaceae     | Pasteurellaceae_G-2  | Pasteurellaceae_G-2         |
| ASV765  | Bacteria | Proteobacteria | Gammaproteobacteria | Pasteurellales    | Pasteurellaceae     | Pasteurellaceae_G-2  | Pasteurellaceae_G-2         |
| ASV796  | Bacteria | Proteobacteria | Gammaproteobacteria | Pasteurellales    | Pasteurellaceae     | Pasteurellaceae_G-2  | Pasteurellaceae_G-2         |
| ASV1152 | Bacteria | Proteobacteria | Gammaproteobacteria | Pasteurellales    | Pasteurellaceae     | Pasteurellaceae_G-2  | Pasteurellaceae_G-2         |
| ASV1706 | Bacteria | Proteobacteria | Gammaproteobacteria | Pasteurellales    | Pasteurellaceae     | Pasteurellaceae_G-1  | Pasteurellaceae_G-1         |
| ASV1707 | Bacteria | Proteobacteria | Gammaproteobacteria | Pasteurellales    | Pasteurellaceae     | Pasteurellaceae_G-1  | Pasteurellaceae_G-1         |
| ASV1585 | Bacteria | Proteobacteria | Gammaproteobacteria | Aeromonadales     | Succinivibrionaceae | Anaerobiospirillum   | Anaerobiospirillum          |
| ASV1661 | Bacteria | Proteobacteria | Gammaproteobacteria | Aeromonadales     | Succinivibrionaceae | Anaerobiospirillum   | Anaerobiospirillum          |
| ASV1587 | Bacteria | Proteobacteria | Gammaproteobacteria | Chromatiales      | Chromatiaceae       | Rheinheimera         | Rheinheimera                |
| ASV1416 | Bacteria | Proteobacteria | Gammaproteobacteria | Enterobacteriales | Enterobacteriaceae  | Escherichia/Shigella | Escherichia/Shigella        |
| ASV1539 | Bacteria | Proteobacteria | Gammaproteobacteria | Enterobacteriales | Enterobacteriaceae  | Escherichia/Shigella | Escherichia/Shigella        |
| ASV956  | Bacteria | Proteobacteria | Gammaproteobacteria | Cardiobacteriales | Cardiobacteriaceae  | Cardiobacterium      | Cardiobacterium             |
| ASV1215 | Bacteria | Proteobacteria | Gammaproteobacteria | Cardiobacteriales | Cardiobacteriaceae  | Cardiobacterium      | Cardiobacterium             |
| ASV1003 | Bacteria | Proteobacteria | Gammaproteobacteria | Cardiobacteriales | Cardiobacteriaceae  | Cardiobacteriaceae   | Cardiobacteriaceae          |
| ASV933  | Bacteria | Proteobacteria | Gammaproteobacteria | Cardiobacteriales | Cardiobacteriaceae  | Cardiobacteriaceae   | Cardiobacteriaceae          |
| ASV403  | Bacteria | Proteobacteria | Gammaproteobacteria | Cardiobacteriales | Cardiobacteriaceae  | Cardiobacterium      | Cardiobacterium_sp._COT_176 |
| ASV1662 | Bacteria | Proteobacteria | Gammaproteobacteria | Cardiobacteriales | Cardiobacteriaceae  | Cardiobacterium      | Cardiobacterium             |

|         |          |                |                     |                     |                     |                     |                                 |
|---------|----------|----------------|---------------------|---------------------|---------------------|---------------------|---------------------------------|
| ASV230  | Bacteria | Proteobacteria | Gammaproteobacteria | Cardiobacteriales   | Cardiobacteriaceae  | Cardiobacterium     | Cardiobacterium                 |
| ASV1476 | Bacteria | Proteobacteria | Gammaproteobacteria | Cardiobacteriales   | Cardiobacteriaceae  | Cardiobacterium     | Cardiobacterium                 |
| ASV505  | Bacteria | Proteobacteria | Gammaproteobacteria | Cardiobacteriales   | Cardiobacteriaceae  | Cardiobacterium     | Cardiobacterium                 |
| ASV546  | Bacteria | Proteobacteria | Gammaproteobacteria | Cardiobacteriales   | Cardiobacteriaceae  | Cardiobacterium     | Cardiobacterium_sp._CO<br>T_238 |
| ASV1227 | Bacteria | Proteobacteria | Gammaproteobacteria | Cardiobacteriales   | Cardiobacteriaceae  | Cardiobacterium     | Cardiobacterium                 |
| ASV877  | Bacteria | Proteobacteria | Gammaproteobacteria | Cardiobacteriales   | Cardiobacteriaceae  | Cardiobacterium     | Cardiobacterium_sp._CO<br>T_238 |
| ASV954  | Bacteria | Proteobacteria | Gammaproteobacteria | Cardiobacteriales   | Cardiobacteriaceae  | Cardiobacterium     | Cardiobacterium                 |
| ASV1536 | Bacteria | Proteobacteria | Gammaproteobacteria | Cardiobacteriales   | Cardiobacteriaceae  | Cardiobacterium     | Cardiobacterium                 |
| ASV118  | Bacteria | Proteobacteria | Gammaproteobacteria | Cardiobacteriales   | Cardiobacteriaceae  | Cardiobacterium     | Cardiobacterium_sp._CO<br>T_177 |
| ASV190  | Bacteria | Proteobacteria | Gammaproteobacteria | Cardiobacteriales   | Cardiobacteriaceae  | Cardiobacterium     | Cardiobacterium                 |
| ASV749  | Bacteria | Proteobacteria | Gammaproteobacteria | Cardiobacteriales   | Cardiobacteriaceae  | Cardiobacterium     | Cardiobacterium                 |
| ASV1070 | Bacteria | Proteobacteria | Gammaproteobacteria | Cardiobacteriales   | Cardiobacteriaceae  | Cardiobacterium     | Cardiobacterium                 |
| ASV1327 | Bacteria | Proteobacteria | Gammaproteobacteria | Cardiobacteriales   | Cardiobacteriaceae  | Cardiobacterium     | Cardiobacterium                 |
| ASV1371 | Bacteria | Proteobacteria | Gammaproteobacteria | Cardiobacteriales   | Cardiobacteriaceae  | Cardiobacterium     | Cardiobacterium                 |
| ASV1744 | Bacteria | Proteobacteria | Gammaproteobacteria | Pasteurellales      | Pasteurellaceae     | Nicoletella         | Nicoletella                     |
| ASV1746 | Bacteria | Proteobacteria | Gammaproteobacteria | Gammaproteobacteria | Gammaproteobacteria | Gammaproteobacteria | Gammaproteobacteria             |
| ASV1757 | Bacteria | Proteobacteria | Gammaproteobacteria | Pasteurellales      | Pasteurellaceae     | Pasteurellaceae     | Pasteurellaceae                 |

|         |          |                |                     |                |                 |               |                 |
|---------|----------|----------------|---------------------|----------------|-----------------|---------------|-----------------|
| ASV1759 | Bacteria | Proteobacteria | Gammaproteobacteria | Pasteurellales | Pasteurellaceae | Frederiksenia | Frederiksenia   |
| ASV63   | Bacteria | Proteobacteria | Betaproteobacteria  | Neisseriales   | Neisseriaceae   | Aquaspirillum | Aquaspirillum   |
| ASV629  | Bacteria | Proteobacteria | Betaproteobacteria  | Neisseriales   | Neisseriaceae   | Aquaspirillum | Aquaspirillum   |
| ASV95   | Bacteria | Proteobacteria | Betaproteobacteria  | Neisseriales   | Neisseriaceae   | Aquaspirillum | Aquaspirillum   |
| ASV893  | Bacteria | Proteobacteria | Betaproteobacteria  | Neisseriales   | Neisseriaceae   | Aquaspirillum | Aquaspirillum   |
| ASV789  | Bacteria | Proteobacteria | Betaproteobacteria  | Neisseriales   | Neisseriaceae   | Aquaspirillum | Aquaspirillum   |
| ASV384  | Bacteria | Proteobacteria | Betaproteobacteria  | Neisseriales   | Neisseriaceae   | Aquaspirillum | Aquaspirillum   |
| ASV506  | Bacteria | Proteobacteria | Betaproteobacteria  | Neisseriales   | Neisseriaceae   | Aquaspirillum | Aquaspirillum   |
| ASV977  | Bacteria | Proteobacteria | Betaproteobacteria  | Neisseriales   | Neisseriaceae   | Aquaspirillum | Aquaspirillum   |
| ASV445  | Bacteria | Proteobacteria | Betaproteobacteria  | Neisseriales   | Neisseriaceae   | Neisseria     | Neisseria       |
| ASV806  | Bacteria | Proteobacteria | Betaproteobacteria  | Neisseriales   | Neisseriaceae   | Neisseria     | Neisseria       |
| ASV83   | Bacteria | Proteobacteria | Betaproteobacteria  | Neisseriales   | Neisseriaceae   | Neisseria     | Neisseria       |
| ASV1041 | Bacteria | Proteobacteria | Betaproteobacteria  | Neisseriales   | Neisseriaceae   | Neisseria     | Neisseria       |
| ASV206  | Bacteria | Proteobacteria | Betaproteobacteria  | Neisseriales   | Neisseriaceae   | Neisseria     | Neisseria       |
| ASV189  | Bacteria | Proteobacteria | Betaproteobacteria  | Neisseriales   | Neisseriaceae   | Neisseria     | Neisseria_canis |
| ASV115  | Bacteria | Proteobacteria | Betaproteobacteria  | Neisseriales   | Neisseriaceae   | Neisseria     | Neisseria       |
| ASV394  | Bacteria | Proteobacteria | Betaproteobacteria  | Neisseriales   | Neisseriaceae   | Neisseria     | Neisseria       |



|         |          |                |                    |              |               |                 |                 |
|---------|----------|----------------|--------------------|--------------|---------------|-----------------|-----------------|
| ASV1654 | Bacteria | Proteobacteria | Betaproteobacteria | Neisseriales | Neisseriaceae | Neisseria       | Neisseria       |
| ASV1509 | Bacteria | Proteobacteria | Betaproteobacteria | Neisseriales | Neisseriaceae | Neisseria       | Neisseria       |
| ASV1543 | Bacteria | Proteobacteria | Betaproteobacteria | Neisseriales | Neisseriaceae | Neisseria       | Neisseria       |
| ASV1219 | Bacteria | Proteobacteria | Betaproteobacteria | Neisseriales | Neisseriaceae | Neisseria       | Neisseria       |
| ASV319  | Bacteria | Proteobacteria | Betaproteobacteria | Neisseriales | Neisseriaceae | Neisseria       | Neisseria       |
| ASV609  | Bacteria | Proteobacteria | Betaproteobacteria | Neisseriales | Neisseriaceae | Neisseria       | Neisseria       |
| ASV1069 | Bacteria | Proteobacteria | Betaproteobacteria | Neisseriales | Neisseriaceae | Neisseriaceae   | Neisseriaceae   |
| ASV1441 | Bacteria | Proteobacteria | Betaproteobacteria | Neisseriales | Neisseriaceae | Neisseriaceae   | Neisseriaceae   |
| ASV309  | Bacteria | Proteobacteria | Betaproteobacteria | Neisseriales | Neisseriaceae | Eikonella       | Eikonella       |
| ASV1163 | Bacteria | Proteobacteria | Betaproteobacteria | Neisseriales | Neisseriaceae | Neisseria       | Neisseria       |
| ASV375  | Bacteria | Proteobacteria | Betaproteobacteria | Neisseriales | Neisseriaceae | Neisseriaceae   | Neisseriaceae   |
| ASV1522 | Bacteria | Proteobacteria | Betaproteobacteria | Neisseriales | Neisseriaceae | Neisseriaceae   | Neisseriaceae   |
| ASV1307 | Bacteria | Proteobacteria | Betaproteobacteria | Neisseriales | Neisseriaceae | Conchiformibius | Conchiformibius |
| ASV787  | Bacteria | Proteobacteria | Betaproteobacteria | Neisseriales | Neisseriaceae | Conchiformibius | Conchiformibius |
| ASV1241 | Bacteria | Proteobacteria | Betaproteobacteria | Neisseriales | Neisseriaceae | Conchiformibius | Conchiformibius |
| ASV619  | Bacteria | Proteobacteria | Betaproteobacteria | Neisseriales | Neisseriaceae | Conchiformibius | Conchiformibius |
| ASV127  | Bacteria | Proteobacteria | Betaproteobacteria | Neisseriales | Neisseriaceae | Conchiformibius | Conchiformibius |

|         |          |                |                    |              |               |                 |                                 |
|---------|----------|----------------|--------------------|--------------|---------------|-----------------|---------------------------------|
| ASV842  | Bacteria | Proteobacteria | Betaproteobacteria | Neisseriales | Neisseriaceae | Conchiformibius | Conchiformibius                 |
| ASV1335 | Bacteria | Proteobacteria | Betaproteobacteria | Neisseriales | Neisseriaceae | Conchiformibius | Conchiformibius                 |
| ASV192  | Bacteria | Proteobacteria | Betaproteobacteria | Neisseriales | Neisseriaceae | Conchiformibius | Conchiformibius_sp._CO<br>T_286 |
| ASV594  | Bacteria | Proteobacteria | Betaproteobacteria | Neisseriales | Neisseriaceae | Conchiformibius | Conchiformibius                 |
| ASV484  | Bacteria | Proteobacteria | Betaproteobacteria | Neisseriales | Neisseriaceae | Conchiformibius | Conchiformibius                 |
| ASV1257 | Bacteria | Proteobacteria | Betaproteobacteria | Neisseriales | Neisseriaceae | Conchiformibius | Conchiformibius                 |
| ASV1364 | Bacteria | Proteobacteria | Betaproteobacteria | Neisseriales | Neisseriaceae | Conchiformibius | Conchiformibius                 |
| ASV1107 | Bacteria | Proteobacteria | Betaproteobacteria | Neisseriales | Neisseriaceae | Conchiformibius | Conchiformibius                 |
| ASV1593 | Bacteria | Proteobacteria | Betaproteobacteria | Neisseriales | Neisseriaceae | Conchiformibius | Conchiformibius_steedae         |
| ASV657  | Bacteria | Proteobacteria | Betaproteobacteria | Neisseriales | Neisseriaceae | Conchiformibius | Conchiformibius                 |
| ASV678  | Bacteria | Proteobacteria | Betaproteobacteria | Neisseriales | Neisseriaceae | Conchiformibius | Conchiformibius                 |
| ASV691  | Bacteria | Proteobacteria | Betaproteobacteria | Neisseriales | Neisseriaceae | Conchiformibius | Conchiformibius                 |
| ASV901  | Bacteria | Proteobacteria | Betaproteobacteria | Neisseriales | Neisseriaceae | Conchiformibius | Conchiformibius                 |
| ASV1306 | Bacteria | Proteobacteria | Betaproteobacteria | Neisseriales | Neisseriaceae | Conchiformibius | Conchiformibius                 |
| ASV754  | Bacteria | Proteobacteria | Betaproteobacteria | Neisseriales | Neisseriaceae | Alysiella       | Alysiella                       |
| ASV987  | Bacteria | Proteobacteria | Betaproteobacteria | Neisseriales | Neisseriaceae | Conchiformibius | Conchiformibius                 |
| ASV752  | Bacteria | Proteobacteria | Betaproteobacteria | Neisseriales | Neisseriaceae | Conchiformibius | Conchiformibius                 |

|         |          |                |                    |              |               |                 |                                 |
|---------|----------|----------------|--------------------|--------------|---------------|-----------------|---------------------------------|
| ASV1302 | Bacteria | Proteobacteria | Betaproteobacteria | Neisseriales | Neisseriaceae | Conchiformibius | Conchiformibius                 |
| ASV1373 | Bacteria | Proteobacteria | Betaproteobacteria | Neisseriales | Neisseriaceae | Conchiformibius | Conchiformibius                 |
| ASV313  | Bacteria | Proteobacteria | Betaproteobacteria | Neisseriales | Neisseriaceae | Conchiformibius | Conchiformibius_sp._CO<br>T_289 |
| ASV255  | Bacteria | Proteobacteria | Betaproteobacteria | Neisseriales | Neisseriaceae | Conchiformibius | Conchiformibius                 |
| ASV423  | Bacteria | Proteobacteria | Betaproteobacteria | Neisseriales | Neisseriaceae | Conchiformibius | Conchiformibius                 |
| ASV641  | Bacteria | Proteobacteria | Betaproteobacteria | Neisseriales | Neisseriaceae | Conchiformibius | Conchiformibius_sp._CO<br>T_289 |
| ASV650  | Bacteria | Proteobacteria | Betaproteobacteria | Neisseriales | Neisseriaceae | Conchiformibius | Conchiformibius                 |
| ASV1273 | Bacteria | Proteobacteria | Betaproteobacteria | Neisseriales | Neisseriaceae | Conchiformibius | Conchiformibius                 |
| ASV1504 | Bacteria | Proteobacteria | Betaproteobacteria | Neisseriales | Neisseriaceae | Conchiformibius | Conchiformibius                 |
| ASV1143 | Bacteria | Proteobacteria | Betaproteobacteria | Neisseriales | Neisseriaceae | Neisseria       | Neisseria                       |
| ASV1530 | Bacteria | Proteobacteria | Betaproteobacteria | Neisseriales | Neisseriaceae | Neisseria       | Neisseria                       |
| ASV368  | Bacteria | Proteobacteria | Betaproteobacteria | Neisseriales | Neisseriaceae | Neisseria       | Neisseria                       |
| ASV792  | Bacteria | Proteobacteria | Betaproteobacteria | Neisseriales | Neisseriaceae | Neisseria       | Neisseria                       |
| ASV111  | Bacteria | Proteobacteria | Betaproteobacteria | Neisseriales | Neisseriaceae | Neisseria       | Neisseria                       |
| ASV798  | Bacteria | Proteobacteria | Betaproteobacteria | Neisseriales | Neisseriaceae | Neisseria       | Neisseria                       |
| ASV123  | Bacteria | Proteobacteria | Betaproteobacteria | Neisseriales | Neisseriaceae | Neisseria       | Neisseria                       |
| ASV150  | Bacteria | Proteobacteria | Betaproteobacteria | Neisseriales | Neisseriaceae | Neisseria       | Neisseria                       |

|         |          |                |                     |                 |               |               |                       |
|---------|----------|----------------|---------------------|-----------------|---------------|---------------|-----------------------|
| ASV97   | Bacteria | Proteobacteria | Betaproteobacteria  | Neisseriales    | Neisseriaceae | Neisseria     | Neisseria             |
| ASV222  | Bacteria | Proteobacteria | Betaproteobacteria  | Neisseriales    | Neisseriaceae | Neisseria     | Neisseria             |
| ASV1443 | Bacteria | Proteobacteria | Betaproteobacteria  | Neisseriales    | Neisseriaceae | Neisseria     | Neisseria             |
| ASV651  | Bacteria | Proteobacteria | Betaproteobacteria  | Neisseriales    | Neisseriaceae | Neisseria     | Neisseria             |
| ASV207  | Bacteria | Proteobacteria | Betaproteobacteria  | Neisseriales    | Neisseriaceae | Neisseria     | Neisseria_canis       |
| ASV638  | Bacteria | Proteobacteria | Betaproteobacteria  | Neisseriales    | Neisseriaceae | Neisseria     | Neisseria             |
| ASV1703 | Bacteria | Proteobacteria | Betaproteobacteria  | Neisseriales    | Neisseriaceae | Neisseriaceae | Neisseriaceae         |
| ASV1572 | Bacteria | Proteobacteria | Betaproteobacteria  | Neisseriales    | Neisseriaceae | Neisseria     | Neisseria             |
| ASV1613 | Bacteria | Proteobacteria | Betaproteobacteria  | Neisseriales    | Neisseriaceae | Neisseria     | Neisseria             |
| ASV1614 | Bacteria | Proteobacteria | Gammaproteobacteria | Pseudomonadales | Moraxellaceae | Moraxella     | Moraxella             |
| ASV413  | Bacteria | Proteobacteria | Gammaproteobacteria | Pseudomonadales | Moraxellaceae | Acinetobacter | Acinetobacter         |
| ASV770  | Bacteria | Proteobacteria | Gammaproteobacteria | Pseudomonadales | Moraxellaceae | Acinetobacter | Acinetobacter         |
| ASV1277 | Bacteria | Proteobacteria | Gammaproteobacteria | Pseudomonadales | Moraxellaceae | Moraxellaceae | Moraxellaceae         |
| ASV1026 | Bacteria | Proteobacteria | Gammaproteobacteria | Pseudomonadales | Moraxellaceae | Moraxella     | Moraxella             |
| ASV1179 | Bacteria | Proteobacteria | Gammaproteobacteria | Pseudomonadales | Moraxellaceae | Moraxella     | Moraxella             |
| ASV725  | Bacteria | Proteobacteria | Gammaproteobacteria | Pseudomonadales | Moraxellaceae | Moraxella     | Moraxella             |
| ASV379  | Bacteria | Proteobacteria | Gammaproteobacteria | Pseudomonadales | Moraxellaceae | Moraxella     | Moraxella_sp._COT_396 |

|         |          |                |                     |                 |               |               |               |
|---------|----------|----------------|---------------------|-----------------|---------------|---------------|---------------|
| ASV144  | Bacteria | Proteobacteria | Gammaproteobacteria | Pseudomonadales | Moraxellaceae | Moraxella     | Moraxella     |
| ASV53   | Bacteria | Proteobacteria | Gammaproteobacteria | Pseudomonadales | Moraxellaceae | Moraxella     | Moraxella     |
| ASV3    | Bacteria | Proteobacteria | Gammaproteobacteria | Pseudomonadales | Moraxellaceae | Moraxella     | Moraxella     |
| ASV921  | Bacteria | Proteobacteria | Gammaproteobacteria | Pseudomonadales | Moraxellaceae | Moraxella     | Moraxella     |
| ASV757  | Bacteria | Proteobacteria | Gammaproteobacteria | Pseudomonadales | Moraxellaceae | Moraxella     | Moraxella     |
| ASV126  | Bacteria | Proteobacteria | Gammaproteobacteria | Pseudomonadales | Moraxellaceae | Moraxella     | Moraxella     |
| ASV662  | Bacteria | Proteobacteria | Gammaproteobacteria | Pseudomonadales | Moraxellaceae | Moraxella     | Moraxella     |
| ASV1033 | Bacteria | Proteobacteria | Gammaproteobacteria | Pseudomonadales | Moraxellaceae | Moraxella     | Moraxella     |
| ASV768  | Bacteria | Proteobacteria | Gammaproteobacteria | Pseudomonadales | Moraxellaceae | Moraxella     | Moraxella     |
| ASV1110 | Bacteria | Proteobacteria | Gammaproteobacteria | Pseudomonadales | Moraxellaceae | Moraxella     | Moraxella     |
| ASV69   | Bacteria | Proteobacteria | Gammaproteobacteria | Pseudomonadales | Moraxellaceae | Moraxella     | Moraxella     |
| ASV1140 | Bacteria | Proteobacteria | Gammaproteobacteria | Pseudomonadales | Moraxellaceae | Moraxella     | Moraxella     |
| ASV1209 | Bacteria | Proteobacteria | Gammaproteobacteria | Pseudomonadales | Moraxellaceae | Moraxella     | Moraxella     |
| ASV1437 | Bacteria | Proteobacteria | Gammaproteobacteria | Pseudomonadales | Moraxellaceae | Moraxella     | Moraxella     |
| ASV1652 | Bacteria | Proteobacteria | Gammaproteobacteria | Pseudomonadales | Moraxellaceae | Enhydrobacter | Enhydrobacter |
| ASV1471 | Bacteria | Proteobacteria | Gammaproteobacteria | Pseudomonadales | Moraxellaceae | Moraxella     | Moraxella     |
| ASV1659 | Bacteria | Proteobacteria | Gammaproteobacteria | Pseudomonadales | Moraxellaceae | Moraxella     | Moraxella     |

|         |          |                |                     |                 |                 |             |                       |
|---------|----------|----------------|---------------------|-----------------|-----------------|-------------|-----------------------|
| ASV1599 | Bacteria | Proteobacteria | Gammaproteobacteria | Pseudomonadales | Moraxellaceae   | Moraxella   | Moraxella             |
| ASV1714 | Bacteria | Bacteroidetes  | Bacteroidia         | Bacteroidia_O-1 | Bacteroidia_F-1 | Odoribacter | Odoribacter           |
| ASV1758 | Bacteria | Proteobacteria | Gammaproteobacteria | Pseudomonadales | Moraxellaceae   | Faucicola   | Faucicola             |
| ASV1272 | Bacteria | Proteobacteria | Gammaproteobacteria | Pseudomonadales | Moraxellaceae   | Faucicola   | Faucicola             |
| ASV1375 | Bacteria | Proteobacteria | Gammaproteobacteria | Pseudomonadales | Moraxellaceae   | Faucicola   | Faucicola             |
| ASV626  | Bacteria | Proteobacteria | Gammaproteobacteria | Pseudomonadales | Moraxellaceae   | Moraxella   | Moraxella             |
| ASV1099 | Bacteria | Proteobacteria | Gammaproteobacteria | Pseudomonadales | Moraxellaceae   | Moraxella   | Moraxella             |
| ASV371  | Bacteria | Proteobacteria | Gammaproteobacteria | Pseudomonadales | Moraxellaceae   | Moraxella   | Moraxella             |
| ASV845  | Bacteria | Proteobacteria | Gammaproteobacteria | Pseudomonadales | Moraxellaceae   | Moraxella   | Moraxella             |
| ASV527  | Bacteria | Proteobacteria | Gammaproteobacteria | Pseudomonadales | Moraxellaceae   | Moraxella   | Moraxella             |
| ASV243  | Bacteria | Proteobacteria | Gammaproteobacteria | Pseudomonadales | Moraxellaceae   | Moraxella   | Moraxella             |
| ASV352  | Bacteria | Proteobacteria | Gammaproteobacteria | Pseudomonadales | Moraxellaceae   | Moraxella   | Moraxella             |
| ASV946  | Bacteria | Proteobacteria | Gammaproteobacteria | Pseudomonadales | Moraxellaceae   | Moraxella   | Moraxella             |
| ASV676  | Bacteria | Proteobacteria | Gammaproteobacteria | Pseudomonadales | Moraxellaceae   | Moraxella   | Moraxella             |
| ASV1311 | Bacteria | Proteobacteria | Gammaproteobacteria | Pseudomonadales | Moraxellaceae   | Moraxella   | Moraxella             |
| ASV1    | Bacteria | Proteobacteria | Gammaproteobacteria | Pseudomonadales | Moraxellaceae   | Moraxella   | Moraxella_sp._COT_018 |
| ASV30   | Bacteria | Proteobacteria | Gammaproteobacteria | Pseudomonadales | Moraxellaceae   | Moraxella   | Moraxella             |

|         |          |                |                     |                 |                  |             |                       |
|---------|----------|----------------|---------------------|-----------------|------------------|-------------|-----------------------|
| ASV93   | Bacteria | Proteobacteria | Gammaproteobacteria | Pseudomonadales | Moraxellaceae    | Moraxella   | Moraxella             |
| ASV194  | Bacteria | Proteobacteria | Gammaproteobacteria | Pseudomonadales | Moraxellaceae    | Moraxella   | Moraxella             |
| ASV1344 | Bacteria | Proteobacteria | Gammaproteobacteria | Pseudomonadales | Moraxellaceae    | Moraxella   | Moraxella             |
| ASV721  | Bacteria | Actinobacteria | Actinobacteria      | Actinomycetales | Actinomycetaceae | Actinomyces | Actinomyces_bacterium |
| ASV1330 | Bacteria | Actinobacteria | Actinobacteria      | Actinomycetales | Actinomycetaceae | Actinomyces | Actinomyces           |
| ASV252  | Bacteria | Actinobacteria | Actinobacteria      | Actinomycetales | Actinomycetaceae | Actinomyces | Actinomyces_canis     |
| ASV642  | Bacteria | Actinobacteria | Actinobacteria      | Actinomycetales | Actinomycetaceae | Actinomyces | Actinomyces           |
| ASV713  | Bacteria | Actinobacteria | Actinobacteria      | Actinomycetales | Actinomycetaceae | Actinomyces | Actinomyces           |
| ASV996  | Bacteria | Actinobacteria | Actinobacteria      | Actinomycetales | Actinomycetaceae | Actinomyces | Actinomyces           |
| ASV1260 | Bacteria | Actinobacteria | Actinobacteria      | Actinomycetales | Actinomycetaceae | Actinomyces | Actinomyces           |
| ASV1510 | Bacteria | Actinobacteria | Actinobacteria      | Actinomycetales | Actinomycetaceae | Actinomyces | Actinomyces           |
| ASV1082 | Bacteria | Actinobacteria | Actinobacteria      | Actinomycetales | Actinomycetaceae | Actinomyces | Actinomyces           |
| ASV134  | Bacteria | Actinobacteria | Actinobacteria      | Actinomycetales | Actinomycetaceae | Actinomyces | Actinomyces           |
| ASV233  | Bacteria | Actinobacteria | Actinobacteria      | Actinomycetales | Actinomycetaceae | Actinomyces | Actinomyces           |
| ASV1289 | Bacteria | Actinobacteria | Actinobacteria      | Actinomycetales | Actinomycetaceae | Actinomyces | Actinomyces           |
| ASV1059 | Bacteria | Actinobacteria | Actinobacteria      | Actinomycetales | Actinomycetaceae | Actinomyces | Actinomyces           |
| ASV1193 | Bacteria | Actinobacteria | Actinobacteria      | Actinomycetales | Actinomycetaceae | Actinomyces | Actinomyces           |

|         |          |                |                |                 |                  |                 |                        |
|---------|----------|----------------|----------------|-----------------|------------------|-----------------|------------------------|
| ASV552  | Bacteria | Actinobacteria | Actinobacteria | Actinomycetales | Actinomycetaceae | Actinomyces     | Actinomyces            |
| ASV1113 | Bacteria | Actinobacteria | Actinobacteria | Actinomycetales | Actinomycetaceae | Actinomyces     | Actinomyces            |
| ASV1533 | Bacteria | Actinobacteria | Actinobacteria | Actinomycetales | Actinomycetaceae | Actinomyces     | Actinomyces            |
| ASV1742 | Bacteria | Actinobacteria | Actinobacteria | Actinomycetales | Actinomycetaceae | Actinomyces     | Actinomyces            |
| ASV1309 | Bacteria | Actinobacteria | Actinobacteria | Actinomycetales | Actinomycetaceae | Actinomyces     | Actinomyces            |
| ASV1498 | Bacteria | Actinobacteria | Actinobacteria | Actinomycetales | Actinomycetaceae | Actinomyces     | Actinomyces_weissii    |
| ASV532  | Bacteria | Actinobacteria | Actinobacteria | Actinomycetales | Actinomycetaceae | Actinomyces     | Actinomyces_weissii    |
| ASV930  | Bacteria | Actinobacteria | Actinobacteria | Actinomycetales | Actinomycetaceae | Actinomyces     | Actinomyces            |
| ASV822  | Bacteria | Actinobacteria | Actinobacteria | Actinomycetales | Actinomycetaceae | Actinomyces     | Actinomyces_bowdenii   |
| ASV1096 | Bacteria | Actinobacteria | Actinobacteria | Actinomycetales | Actinomycetaceae | Actinomyces     | Actinomyces            |
| ASV160  | Bacteria | Actinobacteria | Actinobacteria | Actinomycetales | Actinomycetaceae | Actinomyces     | Actinomyces            |
| ASV542  | Bacteria | Actinobacteria | Actinobacteria | Actinomycetales | Actinomycetaceae | Actinomyces     | Actinomyces_coleocanis |
| ASV885  | Bacteria | Actinobacteria | Actinobacteria | Actinomycetales | Actinomycetaceae | Actinomyces     | Actinomyces            |
| ASV428  | Bacteria | Actinobacteria | Actinobacteria | Actinomycetales | Actinomycetales  | Actinomycetales | Actinomycetales        |
| ASV925  | Bacteria | Actinobacteria | Actinobacteria | Actinomycetales | Actinomycetaceae | Actinomyces     | Actinomyces            |
| ASV99   | Bacteria | Actinobacteria | Actinobacteria | Actinomycetales | Actinomycetaceae | Actinomyces     | Actinomyces            |
| ASV980  | Bacteria | Actinobacteria | Actinobacteria | Actinomycetales | Actinomycetaceae | Actinomyces     | Actinomyces            |



|         |          |                |                |                   |                    |                   |                            |
|---------|----------|----------------|----------------|-------------------|--------------------|-------------------|----------------------------|
| ASV695  | Bacteria | Actinobacteria | Actinobacteria | Actinomycetales   | Actinomycetaceae   | Actinomyces       | Actinomyces                |
| ASV839  | Bacteria | Actinobacteria | Actinobacteria | Actinomycetales   | Actinomycetaceae   | Actinomyces       | Actinomyces_hordeovulneris |
| ASV576  | Bacteria | Actinobacteria | Actinobacteria | Actinomycetales   | Microbacteriaceae  | Microbacteriaceae | Microbacteriaceae          |
| ASV991  | Bacteria | Actinobacteria | Actinobacteria | Actinomycetales   | Microbacteriaceae  | Leucobacter       | Leucobacter                |
| ASV1694 | Bacteria | Actinobacteria | Actinobacteria | Actinomycetales   | Microbacteriaceae  | Microbacterium    | Microbacterium             |
| ASV735  | Bacteria | Actinobacteria | Actinobacteria | Actinomycetales   | Microbacteriaceae  | Leucobacter       | Leucobacter                |
| ASV162  | Bacteria | Actinobacteria | Actinobacteria | Actinomycetales   | Microbacteriaceae  | Leucobacter       | Leucobacter                |
| ASV327  | Bacteria | Actinobacteria | Actinobacteria | Actinomycetales   | Microbacteriaceae  | Leucobacter       | Leucobacter                |
| ASV675  | Bacteria | Actinobacteria | Actinobacteria | Actinomycetales   | Microbacteriaceae  | Leucobacter       | Leucobacter                |
| ASV1084 | Bacteria | Actinobacteria | Actinobacteria | Actinomycetales   | Corynebacteriaceae | Corynebacterium   | Corynebacterium            |
| ASV1102 | Bacteria | Actinobacteria | Actinobacteria | Actinomycetales   | Corynebacteriaceae | Corynebacterium   | Corynebacterium            |
| ASV1349 | Bacteria | Actinobacteria | Actinobacteria | Corynebacteriales | Corynebacteriaceae | Corynebacterium   | Corynebacterium            |
| ASV1350 | Bacteria | Actinobacteria | Actinobacteria | Actinomycetales   | Corynebacteriaceae | Corynebacterium   | Corynebacterium            |
| ASV844  | Bacteria | Actinobacteria | Actinobacteria | Corynebacteriales | Corynebacteriaceae | Corynebacterium   | Corynebacterium            |
| ASV1055 | Bacteria | Actinobacteria | Actinobacteria | Corynebacteriales | Corynebacteriaceae | Corynebacterium   | Corynebacterium            |
| ASV936  | Bacteria | Actinobacteria | Actinobacteria | Actinomycetales   | Corynebacteriaceae | Corynebacterium   | Corynebacterium_mustelae   |
| ASV1091 | Bacteria | Actinobacteria | Actinobacteria | Actinomycetales   | Corynebacteriaceae | Corynebacterium   | Corynebacterium            |

|         |          |                |                |                     |                      |                            |                               |
|---------|----------|----------------|----------------|---------------------|----------------------|----------------------------|-------------------------------|
| ASV500  | Bacteria | Actinobacteria | Actinobacteria | Actinomycetales     | Corynebacteriaceae   | Corynebacterium            | Corynebacterium_mustelae      |
| ASV495  | Bacteria | Actinobacteria | Actinobacteria | Actinomycetales     | Corynebacteriaceae   | Corynebacterium            | Corynebacterium_mustelae      |
| ASV838  | Bacteria | Actinobacteria | Actinobacteria | Actinomycetales     | Corynebacteriaceae   | Corynebacterium            | Corynebacterium               |
| ASV388  | Bacteria | Actinobacteria | Actinobacteria | Actinomycetales     | Corynebacteriaceae   | Corynebacterium            | Corynebacterium_freiburgense  |
| ASV412  | Bacteria | Actinobacteria | Actinobacteria | Actinomycetales     | Corynebacteriaceae   | Corynebacterium            | Corynebacterium_freiburgense  |
| ASV203  | Bacteria | Actinobacteria | Actinobacteria | Actinomycetales     | Corynebacteriaceae   | Corynebacterium            | Corynebacterium               |
| ASV1165 | Bacteria | Actinobacteria | Actinobacteria | Actinomycetales     | Corynebacteriaceae   | Corynebacterium            | Corynebacterium               |
| ASV574  | Bacteria | Actinobacteria | Actinobacteria | Actinomycetales     | Corynebacteriaceae   | Corynebacterium            | Corynebacterium_canis         |
| ASV955  | Bacteria | Actinobacteria | Actinobacteria | Actinomycetales     | Corynebacteriaceae   | Corynebacterium            | Corynebacterium               |
| ASV276  | Bacteria | Actinobacteria | Actinobacteria | Actinomycetales     | Propionibacteriaceae | Propionibacterium          | Propionibacterium_sp._COT_300 |
| ASV766  | Bacteria | Actinobacteria | Actinobacteria | Actinomycetales     | Propionibacteriaceae | Propionibacterium          | Propionibacterium             |
| ASV1160 | Bacteria | Actinobacteria | Actinobacteria | Actinomycetales     | Propionibacteriaceae | Propionibacterium          | Propionibacterium             |
| ASV1401 | Bacteria | Actinobacteria | Actinobacteria | Propionibacteriales | Propionibacteriaceae | Cutibacterium              | Cutibacterium                 |
| ASV1586 | Bacteria | Actinobacteria | Actinobacteria | Propionibacteriales | Propionibacteriaceae | Cutibacterium              | Cutibacterium                 |
| ASV1616 | Bacteria | Actinobacteria | Actinobacteria | Propionibacteriales | Propionibacteriaceae | Propionibacteriaceae_[G-1] | Propionibacteriaceae_[G-1]    |
| ASV1529 | Bacteria | Actinobacteria | Actinobacteria | Actinomycetales     | Propionibacteriaceae | Brooklawnia                | Brooklawnia                   |
| ASV1621 | Bacteria | Actinobacteria | Actinobacteria | Propionibacteriales | Propionibacteriaceae | Propionibacteriaceae_[G-2] | Propionibacteriaceae_[G-2]    |

|         |          |                |                    |                    |                      |                    |                                |
|---------|----------|----------------|--------------------|--------------------|----------------------|--------------------|--------------------------------|
| ASV396  | Bacteria | Actinobacteria | Actinobacteria     | Actinomycetales    | Propionibacteriaceae | Propionibacterium  | Propionibacterium_sp._COT_296  |
| ASV443  | Bacteria | Actinobacteria | Actinobacteria     | Actinomycetales    | Propionibacteriaceae | Propionibacterium  | Propionibacterium_sp._COT_324  |
| ASV1249 | Bacteria | Actinobacteria | Actinobacteria     | Bifidobacteriales  | Bifidobacteriaceae   | Bifidobacterium    | Bifidobacterium_pseudolongum   |
| ASV664  | Bacteria | Actinobacteria | Actinobacteria_C-1 | Actinobacteria_O-1 | Actinobacteria_F-1   | Actinobacteria_G-1 | Actinobacteria_G-1_sp._COT_376 |
| ASV226  | Bacteria | Actinobacteria | Actinobacteria_C-1 | Actinobacteria_O-1 | Actinobacteria_F-1   | Actinobacteria_G-1 | Actinobacteria_G-1             |
| ASV1125 | Bacteria | Actinobacteria | Actinobacteria_C-1 | Actinobacteria_O-1 | Actinobacteria_F-1   | Actinobacteria_G-1 | Actinobacteria_G-1             |
| ASV1604 | Bacteria | Actinobacteria | Coriobacterium     | Coriobacteriales   | Coriobacteriaceae    | Atopobium          | Atopobium                      |
| ASV1708 | Bacteria | Actinobacteria | Actinobacteria     | Coriobacteriales   | Coriobacteriaceae    | Adlercreutzia      | Adlercreutzia                  |
| ASV1225 | Bacteria | Bacteria       | Bacteria           | Bacteria           | Bacteria             | Bacteria           | Bacteria                       |
| ASV1569 | Bacteria | Bacteria       | Bacteria           | Bacteria           | Bacteria             | Bacteria           | Bacteria                       |
| ASV668  | Bacteria | Spirochaetes   | Spirochaetia       | Spirochaetales     | Spirochaetaceae      | Treponema          | Treponema                      |
| ASV1254 | Bacteria | Spirochaetes   | Spirochaetia       | Spirochaetales     | Spirochaetaceae      | Treponema          | Treponema                      |
| ASV544  | Bacteria | Spirochaetes   | Spirochaetia       | Spirochaetales     | Spirochaetaceae      | Treponema          | Treponema                      |
| ASV1345 | Bacteria | Spirochaetes   | Spirochaetia       | Spirochaetales     | Spirochaetaceae      | Treponema          | Treponema                      |
| ASV949  | Bacteria | Spirochaetes   | Spirochaetia       | Spirochaetales     | Spirochaetaceae      | Treponema          | Treponema                      |
| ASV1427 | Bacteria | Spirochaetes   | Spirochaetia       | Spirochaetales     | Spirochaetaceae      | Treponema          | Treponema                      |
| ASV1240 | Bacteria | Spirochaetes   | Spirochaetia       | Spirochaetales     | Spirochaetaceae      | Treponema          | Treponema                      |
| ASV614  | Bacteria | Spirochaetes   | Spirochaetia       | Spirochaetales     | Spirochaetaceae      | Treponema          | Treponema_sp._COT_198          |
| ASV729  | Bacteria | Spirochaetes   | Spirochaetia       | Spirochaetales     | Spirochaetaceae      | Treponema          | Treponema                      |
| ASV1046 | Bacteria | Spirochaetes   | Spirochaetia       | Spirochaetales     | Spirochaetaceae      | Treponema          | Treponema                      |
| ASV557  | Bacteria | Spirochaetes   | Spirochaetia       | Spirochaetales     | Spirochaetaceae      | Treponema          | Treponema_sp._COT_198          |
| ASV1126 | Bacteria | Spirochaetes   | Spirochaetia       | Spirochaetales     | Spirochaetaceae      | Treponema          | Treponema                      |

|         |          |              |              |                |                 |           |                           |
|---------|----------|--------------|--------------|----------------|-----------------|-----------|---------------------------|
| ASV958  | Bacteria | Spirochaetes | Spirochaetia | Spirochaetales | Spirochaetaceae | Treponema | Treponema                 |
| ASV1396 | Bacteria | Spirochaetes | Spirochaetia | Spirochaetales | Spirochaetaceae | Treponema | Treponema                 |
| ASV849  | Bacteria | Spirochaetes | Spirochaetia | Spirochaetales | Spirochaetaceae | Treponema | Treponema                 |
| ASV429  | Bacteria | Spirochaetes | Spirochaetia | Spirochaetales | Spirochaetaceae | Treponema | Treponema                 |
| ASV1320 | Bacteria | Spirochaetes | Spirochaetia | Spirochaetales | Spirochaetaceae | Treponema | Treponema                 |
| ASV1221 | Bacteria | Spirochaetes | Spirochaetia | Spirochaetales | Spirochaetaceae | Treponema | Treponema                 |
| ASV790  | Bacteria | Spirochaetes | Spirochaetia | Spirochaetales | Spirochaetaceae | Treponema | Treponema                 |
| ASV240  | Bacteria | Spirochaetes | Spirochaetia | Spirochaetales | Spirochaetaceae | Treponema | Treponema                 |
| ASV897  | Bacteria | Spirochaetes | Spirochaetia | Spirochaetales | Spirochaetaceae | Treponema | Treponema                 |
| ASV905  | Bacteria | Spirochaetes | Spirochaetia | Spirochaetales | Spirochaetaceae | Treponema | Treponema_sp._HMT_23<br>7 |
| ASV1210 | Bacteria | Spirochaetes | Spirochaetia | Spirochaetales | Spirochaetaceae | Treponema | Treponema                 |
| ASV515  | Bacteria | Spirochaetes | Spirochaetia | Spirochaetales | Spirochaetaceae | Treponema | Treponema_sp._HMT_23<br>8 |
| ASV831  | Bacteria | Spirochaetes | Spirochaetia | Spirochaetales | Spirochaetaceae | Treponema | Treponema_sp._HMT_23<br>7 |
| ASV964  | Bacteria | Spirochaetes | Spirochaetia | Spirochaetales | Spirochaetaceae | Treponema | Treponema                 |
| ASV1100 | Bacteria | Spirochaetes | Spirochaetia | Spirochaetales | Spirochaetaceae | Treponema | Treponema_sp._HMT_23<br>7 |
| ASV1265 | Bacteria | Spirochaetes | Spirochaetia | Spirochaetales | Spirochaetaceae | Treponema | Treponema                 |
| ASV1274 | Bacteria | Spirochaetes | Spirochaetia | Spirochaetales | Spirochaetaceae | Treponema | Treponema                 |
| ASV1671 | Bacteria | Spirochaetes | Spirochaetia | Spirochaetales | Spirochaetaceae | Treponema | Treponema                 |
| ASV184  | Bacteria | Spirochaetes | Spirochaetia | Spirochaetales | Spirochaetaceae | Treponema | Treponema_sp._COT_35<br>9 |
| ASV449  | Bacteria | Spirochaetes | Spirochaetia | Spirochaetales | Spirochaetaceae | Treponema | Treponema                 |
| ASV1116 | Bacteria | Spirochaetes | Spirochaetia | Spirochaetales | Spirochaetaceae | Treponema | Treponema                 |
| ASV1242 | Bacteria | Spirochaetes | Spirochaetia | Spirochaetales | Spirochaetaceae | Treponema | Treponema                 |
| ASV804  | Bacteria | Spirochaetes | Spirochaetia | Spirochaetales | Spirochaetaceae | Treponema | Treponema_sp._COT_24<br>7 |
| ASV221  | Bacteria | Spirochaetes | Spirochaetia | Spirochaetales | Spirochaetaceae | Treponema | Treponema                 |
| ASV1121 | Bacteria | Spirochaetes | Spirochaetia | Spirochaetales | Spirochaetaceae | Treponema | Treponema                 |

|         |          |              |              |                |                 |           |                           |
|---------|----------|--------------|--------------|----------------|-----------------|-----------|---------------------------|
| ASV1229 | Bacteria | Spirochaetes | Spirochaetia | Spirochaetales | Spirochaetaceae | Treponema | Treponema                 |
| ASV631  | Bacteria | Spirochaetes | Spirochaetia | Spirochaetales | Spirochaetaceae | Treponema | Treponema                 |
| ASV1212 | Bacteria | Spirochaetes | Spirochaetia | Spirochaetales | Spirochaetaceae | Treponema | Treponema_sp._COT_17<br>0 |
| ASV1751 | Bacteria | Spirochaetes | Spirochaetia | Spirochaetales | Spirochaetaceae | Treponema | Treponema                 |
| ASV457  | Bacteria | Spirochaetes | Spirochaetia | Spirochaetales | Spirochaetaceae | Treponema | Treponema                 |
| ASV547  | Bacteria | Spirochaetes | Spirochaetia | Spirochaetales | Spirochaetaceae | Treponema | Treponema                 |
| ASV301  | Bacteria | Spirochaetes | Spirochaetia | Spirochaetales | Spirochaetaceae | Treponema | Treponema_sp._COT_23<br>3 |
| ASV204  | Bacteria | Spirochaetes | Spirochaetia | Spirochaetales | Spirochaetaceae | Treponema | Treponema_sp._COT_23<br>3 |
| ASV1294 | Bacteria | Spirochaetes | Spirochaetia | Spirochaetales | Spirochaetaceae | Treponema | Treponema                 |
| ASV1333 | Bacteria | Spirochaetes | Spirochaetia | Spirochaetales | Spirochaetaceae | Treponema | Treponema                 |
| ASV767  | Bacteria | Spirochaetes | Spirochaetia | Spirochaetales | Spirochaetaceae | Treponema | Treponema_sp._COT_35<br>5 |
| ASV924  | Bacteria | Spirochaetes | Spirochaetia | Spirochaetales | Spirochaetaceae | Treponema | Treponema                 |
| ASV1430 | Bacteria | Spirochaetes | Spirochaetia | Spirochaetales | Spirochaetaceae | Treponema | Treponema                 |
| ASV873  | Bacteria | Spirochaetes | Spirochaetia | Spirochaetales | Spirochaetaceae | Treponema | Treponema                 |
| ASV907  | Bacteria | Spirochaetes | Spirochaetia | Spirochaetales | Spirochaetaceae | Treponema | Treponema                 |
| ASV1178 | Bacteria | Spirochaetes | Spirochaetia | Spirochaetales | Spirochaetaceae | Treponema | Treponema                 |
| ASV1318 | Bacteria | Spirochaetes | Spirochaetia | Spirochaetales | Spirochaetaceae | Treponema | Treponema                 |
| ASV1475 | Bacteria | Spirochaetes | Spirochaetia | Spirochaetales | Spirochaetaceae | Treponema | Treponema                 |
| ASV1752 | Bacteria | Spirochaetes | Spirochaetia | Spirochaetales | Spirochaetaceae | Treponema | Treponema                 |
| ASV1547 | Bacteria | Spirochaetes | Spirochaetia | Spirochaetales | Spirochaetaceae | Treponema | Treponema                 |
| ASV1366 | Bacteria | Spirochaetes | Spirochaetia | Spirochaetales | Spirochaetaceae | Treponema | Treponema                 |
| ASV1500 | Bacteria | Spirochaetes | Spirochaetia | Spirochaetales | Spirochaetaceae | Treponema | Treponema_sp._HMT_23<br>5 |
| ASV1743 | Bacteria | Spirochaetes | Spirochaetia | Spirochaetales | Spirochaetaceae | Treponema | Treponema                 |
| ASV908  | Bacteria | Spirochaetes | Spirochaetia | Spirochaetales | Spirochaetaceae | Treponema | Treponema                 |
| ASV1324 | Bacteria | Spirochaetes | Spirochaetia | Spirochaetales | Spirochaetaceae | Treponema | Treponema_sp._COT_17<br>1 |

|         |          |              |              |                |                 |           |                           |
|---------|----------|--------------|--------------|----------------|-----------------|-----------|---------------------------|
| ASV1138 | Bacteria | Spirochaetes | Spirochaetia | Spirochaetales | Spirochaetaceae | Treponema | Treponema                 |
| ASV1403 | Bacteria | Spirochaetes | Spirochaetia | Spirochaetales | Spirochaetaceae | Treponema | Treponema                 |
| ASV1407 | Bacteria | Spirochaetes | Spirochaetia | Spirochaetales | Spirochaetaceae | Treponema | Treponema                 |
| ASV1495 | Bacteria | Spirochaetes | Spirochaetia | Spirochaetales | Spirochaetaceae | Treponema | Treponema                 |
| ASV1224 | Bacteria | Spirochaetes | Spirochaetia | Spirochaetales | Spirochaetaceae | Treponema | Treponema                 |
| ASV567  | Bacteria | Spirochaetes | Spirochaetia | Spirochaetales | Spirochaetaceae | Treponema | Treponema_sp._HMT_23<br>9 |
| ASV1064 | Bacteria | Spirochaetes | Spirochaetia | Spirochaetales | Spirochaetaceae | Treponema | Treponema                 |
| ASV945  | Bacteria | Spirochaetes | Spirochaetia | Spirochaetales | Spirochaetaceae | Treponema | Treponema                 |
| ASV636  | Bacteria | Spirochaetes | Spirochaetia | Spirochaetales | Spirochaetaceae | Treponema | Treponema_sp._COT_19<br>9 |
| ASV1230 | Bacteria | Spirochaetes | Spirochaetia | Spirochaetales | Spirochaetaceae | Treponema | Treponema                 |
| ASV1534 | Bacteria | Spirochaetes | Spirochaetia | Spirochaetales | Spirochaetaceae | Treponema | Treponema                 |
| ASV1736 | Bacteria | Spirochaetes | Spirochaetia | Spirochaetales | Spirochaetaceae | Treponema | Treponema                 |
| ASV1592 | Bacteria | Spirochaetes | Spirochaetia | Spirochaetales | Spirochaetaceae | Treponema | Treponema                 |
| ASV1721 | Bacteria | Spirochaetes | Spirochaetia | Spirochaetales | Spirochaetaceae | Treponema | Treponema                 |
| ASV1665 | Bacteria | Spirochaetes | Spirochaetia | Spirochaetales | Spirochaetaceae | Treponema | Treponema                 |
| ASV370  | Bacteria | Spirochaetes | Spirochaetia | Spirochaetales | Spirochaetaceae | Treponema | Treponema_sp._COT_24<br>6 |
| ASV497  | Bacteria | Spirochaetes | Spirochaetia | Spirochaetales | Spirochaetaceae | Treponema | Treponema                 |
| ASV1417 | Bacteria | Spirochaetes | Spirochaetia | Spirochaetales | Spirochaetaceae | Treponema | Treponema                 |
| ASV1482 | Bacteria | Spirochaetes | Spirochaetia | Spirochaetales | Spirochaetaceae | Treponema | Treponema                 |
| ASV1155 | Bacteria | Spirochaetes | Spirochaetia | Spirochaetales | Spirochaetaceae | Treponema | Treponema                 |
| ASV1515 | Bacteria | Spirochaetes | Spirochaetia | Spirochaetales | Spirochaetaceae | Treponema | Treponema                 |
| ASV1145 | Bacteria | Spirochaetes | Spirochaetia | Spirochaetales | Spirochaetaceae | Treponema | Treponema                 |
| ASV1177 | Bacteria | Spirochaetes | Spirochaetia | Spirochaetales | Spirochaetaceae | Treponema | Treponema                 |
| ASV1637 | Bacteria | Spirochaetes | Spirochaetia | Spirochaetales | Spirochaetaceae | Treponema | Treponema                 |
| ASV1446 | Bacteria | Spirochaetes | Spirochaetia | Spirochaetales | Spirochaetaceae | Treponema | Treponema                 |
| ASV884  | Bacteria | Spirochaetes | Spirochaetia | Spirochaetales | Spirochaetaceae | Treponema | Treponema                 |
| ASV1462 | Bacteria | Spirochaetes | Spirochaetia | Spirochaetales | Spirochaetaceae | Treponema | Treponema                 |

|         |          |              |              |                |                 |           |                           |
|---------|----------|--------------|--------------|----------------|-----------------|-----------|---------------------------|
| ASV1251 | Bacteria | Spirochaetes | Spirochaetia | Spirochaetales | Spirochaetaceae | Treponema | Treponema                 |
| ASV793  | Bacteria | Spirochaetes | Spirochaetia | Spirochaetales | Spirochaetaceae | Treponema | Treponema                 |
| ASV1606 | Bacteria | Spirochaetes | Spirochaetia | Spirochaetales | Spirochaetaceae | Treponema | Treponema                 |
| ASV999  | Bacteria | Spirochaetes | Spirochaetia | Spirochaetales | Spirochaetaceae | Treponema | Treponema                 |
| ASV1526 | Bacteria | Spirochaetes | Spirochaetia | Spirochaetales | Spirochaetaceae | Treponema | Treponema                 |
| ASV1750 | Bacteria | Spirochaetes | Spirochaetia | Spirochaetales | Spirochaetaceae | Treponema | Treponema                 |
| ASV979  | Bacteria | Spirochaetes | Spirochaetia | Spirochaetales | Spirochaetaceae | Treponema | Treponema                 |
| ASV1357 | Bacteria | Spirochaetes | Spirochaetia | Spirochaetales | Spirochaetaceae | Treponema | Treponema                 |
| ASV1496 | Bacteria | Spirochaetes | Spirochaetia | Spirochaetales | Spirochaetaceae | Treponema | Treponema                 |
| ASV1631 | Bacteria | Spirochaetes | Spirochaetia | Spirochaetales | Spirochaetaceae | Treponema | Treponema                 |
| ASV681  | Bacteria | Spirochaetes | Spirochaetia | Spirochaetales | Spirochaetaceae | Treponema | Treponema                 |
| ASV1649 | Bacteria | Spirochaetes | Spirochaetia | Spirochaetales | Spirochaetaceae | Treponema | Treponema                 |
| ASV1486 | Bacteria | Spirochaetes | Spirochaetia | Spirochaetales | Spirochaetaceae | Treponema | Treponema                 |
| ASV430  | Bacteria | Spirochaetes | Spirochaetia | Spirochaetales | Spirochaetaceae | Treponema | Treponema_sp._COT_20<br>1 |
| ASV1216 | Bacteria | Spirochaetes | Spirochaetia | Spirochaetales | Spirochaetaceae | Treponema | Treponema                 |
| ASV1317 | Bacteria | Spirochaetes | Spirochaetia | Spirochaetales | Spirochaetaceae | Treponema | Treponema                 |
| ASV1395 | Bacteria | Spirochaetes | Spirochaetia | Spirochaetales | Spirochaetaceae | Treponema | Treponema                 |
| ASV1005 | Bacteria | Spirochaetes | Spirochaetia | Spirochaetales | Spirochaetaceae | Treponema | Treponema                 |
| ASV1189 | Bacteria | Spirochaetes | Spirochaetia | Spirochaetales | Spirochaetaceae | Treponema | Treponema                 |
| ASV330  | Bacteria | Spirochaetes | Spirochaetia | Spirochaetales | Spirochaetaceae | Treponema | Treponema                 |
| ASV755  | Bacteria | Spirochaetes | Spirochaetia | Spirochaetales | Spirochaetaceae | Treponema | Treponema_sp._COT_35<br>0 |
| ASV511  | Bacteria | Spirochaetes | Spirochaetia | Spirochaetales | Spirochaetaceae | Treponema | Treponema                 |
| ASV863  | Bacteria | Spirochaetes | Spirochaetia | Spirochaetales | Spirochaetaceae | Treponema | Treponema                 |
| ASV1032 | Bacteria | Spirochaetes | Spirochaetia | Spirochaetales | Spirochaetaceae | Treponema | Treponema                 |
| ASV84   | Bacteria | Spirochaetes | Spirochaetia | Spirochaetales | Spirochaetaceae | Treponema | Treponema                 |
| ASV523  | Bacteria | Spirochaetes | Spirochaetia | Spirochaetales | Spirochaetaceae | Treponema | Treponema                 |
| ASV492  | Bacteria | Spirochaetes | Spirochaetia | Spirochaetales | Spirochaetaceae | Treponema | Treponema                 |

|         |          |              |              |                |                 |           |                           |
|---------|----------|--------------|--------------|----------------|-----------------|-----------|---------------------------|
| ASV475  | Bacteria | Spirochaetes | Spirochaetia | Spirochaetales | Spirochaetaceae | Treponema | Treponema                 |
| ASV1451 | Bacteria | Spirochaetes | Spirochaetia | Spirochaetales | Spirochaetaceae | Treponema | Treponema                 |
| ASV362  | Bacteria | Spirochaetes | Spirochaetia | Spirochaetales | Spirochaetaceae | Treponema | Treponema                 |
| ASV1020 | Bacteria | Spirochaetes | Spirochaetia | Spirochaetales | Spirochaetaceae | Treponema | Treponema                 |
| ASV685  | Bacteria | Spirochaetes | Spirochaetia | Spirochaetales | Spirochaetaceae | Treponema | Treponema                 |
| ASV1397 | Bacteria | Spirochaetes | Spirochaetia | Spirochaetales | Spirochaetaceae | Treponema | Treponema                 |
| ASV1456 | Bacteria | Spirochaetes | Spirochaetia | Spirochaetales | Spirochaetaceae | Treponema | Treponema                 |
| ASV1040 | Bacteria | Spirochaetes | Spirochaetia | Spirochaetales | Spirochaetaceae | Treponema | Treponema_sp._COT_39<br>7 |
| ASV1630 | Bacteria | Spirochaetes | Spirochaetia | Spirochaetales | Spirochaetaceae | Treponema | Treponema                 |
| ASV1217 | Bacteria | Spirochaetes | Spirochaetia | Spirochaetales | Spirochaetaceae | Treponema | Treponema                 |
| ASV1552 | Bacteria | Spirochaetes | Spirochaetia | Spirochaetales | Spirochaetaceae | Treponema | Treponema                 |
| ASV416  | Bacteria | Spirochaetes | Spirochaetia | Spirochaetales | Spirochaetaceae | Treponema | Treponema                 |
| ASV1086 | Bacteria | Spirochaetes | Spirochaetia | Spirochaetales | Spirochaetaceae | Treponema | Treponema                 |
| ASV34   | Bacteria | Spirochaetes | Spirochaetia | Spirochaetales | Spirochaetaceae | Treponema | Treponema                 |
| ASV1077 | Bacteria | Spirochaetes | Spirochaetia | Spirochaetales | Spirochaetaceae | Treponema | Treponema                 |
| ASV496  | Bacteria | Spirochaetes | Spirochaetia | Spirochaetales | Spirochaetaceae | Treponema | Treponema_denticola       |
| ASV1043 | Bacteria | Spirochaetes | Spirochaetia | Spirochaetales | Spirochaetaceae | Treponema | Treponema                 |
| ASV447  | Bacteria | Spirochaetes | Spirochaetia | Spirochaetales | Spirochaetaceae | Treponema | Treponema                 |
| ASV346  | Bacteria | Spirochaetes | Spirochaetia | Spirochaetales | Spirochaetaceae | Treponema | Treponema_denticola       |
| ASV205  | Bacteria | Spirochaetes | Spirochaetia | Spirochaetales | Spirochaetaceae | Treponema | Treponema_denticola       |
| ASV414  | Bacteria | Spirochaetes | Spirochaetia | Spirochaetales | Spirochaetaceae | Treponema | Treponema                 |
| ASV1010 | Bacteria | Spirochaetes | Spirochaetia | Spirochaetales | Spirochaetaceae | Treponema | Treponema                 |
| ASV20   | Bacteria | Spirochaetes | Spirochaetia | Spirochaetales | Spirochaetaceae | Treponema | Treponema_denticola       |
| ASV39   | Bacteria | Spirochaetes | Spirochaetia | Spirochaetales | Spirochaetaceae | Treponema | Treponema                 |
| ASV308  | Bacteria | Spirochaetes | Spirochaetia | Spirochaetales | Spirochaetaceae | Treponema | Treponema                 |
| ASV522  | Bacteria | Spirochaetes | Spirochaetia | Spirochaetales | Spirochaetaceae | Treponema | Treponema                 |
| ASV1078 | Bacteria | Spirochaetes | Spirochaetia | Spirochaetales | Spirochaetaceae | Treponema | Treponema                 |
| ASV1201 | Bacteria | Spirochaetes | Spirochaetia | Spirochaetales | Spirochaetaceae | Treponema | Treponema                 |



|         |          |              |              |                |                 |           |                           |
|---------|----------|--------------|--------------|----------------|-----------------|-----------|---------------------------|
| ASV1737 | Bacteria | Spirochaetes | Spirochaetia | Spirochaetales | Spirochaetaceae | Treponema | Treponema                 |
| ASV1738 | Bacteria | Spirochaetes | Spirochaetia | Spirochaetales | Spirochaetaceae | Treponema | Treponema                 |
| ASV1368 | Bacteria | Spirochaetes | Spirochaetia | Spirochaetales | Spirochaetaceae | Treponema | Treponema                 |
| ASV1382 | Bacteria | Spirochaetes | Spirochaetia | Spirochaetales | Spirochaetaceae | Treponema | Treponema                 |
| ASV910  | Bacteria | Spirochaetes | Spirochaetia | Spirochaetales | Spirochaetaceae | Treponema | Treponema                 |
| ASV1687 | Bacteria | Spirochaetes | Spirochaetia | Spirochaetales | Spirochaetaceae | Treponema | Treponema                 |
| ASV1027 | Bacteria | Spirochaetes | Spirochaetia | Spirochaetales | Spirochaetaceae | Treponema | Treponema                 |
| ASV1296 | Bacteria | Spirochaetes | Spirochaetia | Spirochaetales | Spirochaetaceae | Treponema | Treponema                 |
| ASV1428 | Bacteria | Spirochaetes | Spirochaetia | Spirochaetales | Spirochaetaceae | Treponema | Treponema                 |
| ASV1709 | Bacteria | Spirochaetes | Spirochaetia | Spirochaetales | Spirochaetaceae | Treponema | Treponema                 |
| ASV983  | Bacteria | Spirochaetes | Spirochaetia | Spirochaetales | Spirochaetaceae | Treponema | Treponema                 |
| ASV1384 | Bacteria | Spirochaetes | Spirochaetia | Spirochaetales | Spirochaetaceae | Treponema | Treponema                 |
| ASV1394 | Bacteria | Spirochaetes | Spirochaetia | Spirochaetales | Spirochaetaceae | Treponema | Treponema                 |
| ASV1402 | Bacteria | Spirochaetes | Spirochaetia | Spirochaetales | Spirochaetaceae | Treponema | Treponema                 |
| ASV1203 | Bacteria | Spirochaetes | Spirochaetia | Spirochaetales | Spirochaetaceae | Treponema | Treponema                 |
| ASV1021 | Bacteria | Spirochaetes | Spirochaetia | Spirochaetales | Spirochaetaceae | Treponema | Treponema_socranskii      |
| ASV997  | Bacteria | Spirochaetes | Spirochaetia | Spirochaetales | Spirochaetaceae | Treponema | Treponema                 |
| ASV1491 | Bacteria | Spirochaetes | Spirochaetia | Spirochaetales | Spirochaetaceae | Treponema | Treponema                 |
| ASV1253 | Bacteria | Spirochaetes | Spirochaetia | Spirochaetales | Spirochaetaceae | Treponema | Treponema                 |
| ASV1550 | Bacteria | Spirochaetes | Spirochaetia | Spirochaetales | Spirochaetaceae | Treponema | Treponema                 |
| ASV601  | Bacteria | Spirochaetes | Spirochaetia | Spirochaetales | Spirochaetaceae | Treponema | Treponema                 |
| ASV800  | Bacteria | Spirochaetes | Spirochaetia | Spirochaetales | Spirochaetaceae | Treponema | Treponema                 |
| ASV813  | Bacteria | Spirochaetes | Spirochaetia | Spirochaetales | Spirochaetaceae | Treponema | Treponema                 |
| ASV1183 | Bacteria | Spirochaetes | Spirochaetia | Spirochaetales | Spirochaetaceae | Treponema | Treponema                 |
| ASV896  | Bacteria | Spirochaetes | Spirochaetia | Spirochaetales | Spirochaetaceae | Treponema | Treponema_parvum          |
| ASV1455 | Bacteria | Spirochaetes | Spirochaetia | Spirochaetales | Spirochaetaceae | Treponema | Treponema                 |
| ASV175  | Bacteria | Spirochaetes | Spirochaetia | Spirochaetales | Spirochaetaceae | Treponema | Treponema_sp._COT_20<br>9 |

|         |          |              |              |                |                 |             |                             |
|---------|----------|--------------|--------------|----------------|-----------------|-------------|-----------------------------|
| ASV843  | Bacteria | Spirochaetes | Spirochaetia | Spirochaetales | Spirochaetaceae | Treponema   | Treponema_sp._COT_35<br>8   |
| ASV771  | Bacteria | Spirochaetes | Spirochaetia | Spirochaetales | Spirochaetaceae | Treponema   | Treponema                   |
| ASV1556 | Bacteria | Spirochaetes | Spirochaetia | Spirochaetales | Spirochaetaceae | Treponema   | Treponema                   |
| ASV929  | Bacteria | Spirochaetes | Spirochaetia | Spirochaetales | Spirochaetaceae | Treponema   | Treponema                   |
| ASV1243 | Bacteria | Spirochaetes | Spirochaetia | Spirochaetales | Spirochaetaceae | Treponema   | Treponema                   |
| ASV568  | Bacteria | Spirochaetes | Spirochaetia | Spirochaetales | Spirochaetaceae | Treponema   | Treponema                   |
| ASV851  | Bacteria | Spirochaetes | Spirochaetia | Spirochaetales | Spirochaetaceae | Treponema   | Treponema                   |
| ASV1336 | Bacteria | Spirochaetes | Spirochaetia | Spirochaetales | Spirochaetaceae | Treponema   | Treponema                   |
| ASV963  | Bacteria | Spirochaetes | Spirochaetia | Spirochaetales | Spirochaetaceae | Treponema   | Treponema                   |
| ASV1293 | Bacteria | Spirochaetes | Spirochaetia | Spirochaetales | Spirochaetaceae | Treponema   | Treponema_sp._COT_35<br>2   |
| ASV180  | Bacteria | Spirochaetes | Spirochaetia | Spirochaetales | Spirochaetaceae | Treponema   | Treponema                   |
| ASV625  | Bacteria | Spirochaetes | Spirochaetia | Spirochaetales | Spirochaetaceae | Treponema   | Treponema                   |
| ASV293  | Bacteria | Spirochaetes | Spirochaetia | Spirochaetales | Spirochaetaceae | Treponema   | Treponema_sp._HMT_49<br>0   |
| ASV193  | Bacteria | Spirochaetes | Spirochaetia | Spirochaetales | Spirochaetaceae | Treponema   | Treponema_sp._COT_35<br>6   |
| ASV51   | Bacteria | Spirochaetes | Spirochaetia | Spirochaetales | Spirochaetaceae | Treponema   | Treponema                   |
| ASV1117 | Bacteria | Spirochaetes | Spirochaetia | Spirochaetales | Spirochaetaceae | Treponema   | Treponema                   |
| ASV565  | Bacteria | Spirochaetes | Spirochaetia | Spirochaetales | Spirochaetaceae | Treponema   | Treponema                   |
| ASV25   | Bacteria | Spirochaetes | Spirochaetia | Spirochaetales | Spirochaetaceae | Treponema   | Treponema_sp._COT_35<br>6   |
| ASV862  | Bacteria | Spirochaetes | Spirochaetia | Spirochaetales | Spirochaetaceae | Treponema   | Treponema                   |
| ASV1667 | Bacteria | Spirochaetes | Spirochaetia | Spirochaetales | Spirochaetaceae | Spirochaeta | Spirochaeta                 |
| ASV343  | Bacteria | Spirochaetes | Spirochaetia | Spirochaetales | Spirochaetaceae | Spirochaeta | Spirochaeta_sp._COT_31<br>4 |
| ASV711  | Bacteria | Spirochaetes | Spirochaetia | Spirochaetales | Spirochaetaceae | Spirochaeta | Spirochaeta                 |
| ASV1202 | Bacteria | Spirochaetes | Spirochaetia | Spirochaetales | Spirochaetaceae | Spirochaeta | Spirochaeta                 |
| ASV408  | Bacteria | Spirochaetes | Spirochaetia | Spirochaetales | Spirochaetaceae | Spirochaeta | Spirochaeta_sp._COT_31<br>4 |

|         |          |                |                     |                   |                    |                    |                            |
|---------|----------|----------------|---------------------|-------------------|--------------------|--------------------|----------------------------|
| ASV902  | Bacteria | Spirochaetes   | Spirochaetia        | Spirochaetales    | Spirochaetaceae    | Spirochaeta        | Spirochaeta                |
| ASV922  | Bacteria | Spirochaetes   | Spirochaetia        | Spirochaetales    | Spirochaetaceae    | Sphaerochaeta      | Sphaerochaeta              |
| ASV1517 | Bacteria | Spirochaetes   | Spirochaetia        | Spirochaetales    | Spirochaetaceae    | Sphaerochaeta      | Sphaerochaeta              |
| ASV1391 | Bacteria | Spirochaetes   | Spirochaetia        | Spirochaetales    | Spirochaetaceae    | Sphaerochaeta      | Sphaerochaeta              |
| ASV1279 | Bacteria | Spirochaetes   | Spirochaetia        | Spirochaetales    | Spirochaetaceae    | Spirochaeta        | Spirochaeta                |
| ASV1211 | Bacteria | Spirochaetes   | Spirochaetia        | Spirochaetales    | Spirochaetaceae    | Sphaerochaeta      | Sphaerochaeta              |
| ASV1341 | Bacteria | Spirochaetes   | Spirochaetia        | Spirochaetales    | Spirochaetaceae    | Sphaerochaeta      | Sphaerochaeta              |
| ASV1602 | Bacteria | Spirochaetes   | Spirochaetia        | Spirochaetales    | Spirochaetaceae    | Sphaerochaeta      | Sphaerochaeta              |
| ASV1516 | Bacteria | Bacteria       | Bacteria            | Bacteria          | Bacteria           | Bacteria           | Bacteria                   |
| ASV366  | Bacteria | Spirochaetes   | Spirochaetia        | Spirochaetales    | Spirochaetales     | Spirochaetales_G-1 | Spirochaetales_G-1         |
| ASV710  | Bacteria | Bacteria       | Bacteria            | Bacteria          | Bacteria           | Bacteria           | Bacteria                   |
| ASV521  | Bacteria | Bacteria       | Bacteria            | Bacteria          | Bacteria           | Bacteria           | Bacteria                   |
| ASV938  | Bacteria | Bacteria       | Bacteria            | Bacteria          | Bacteria           | Bacteria           | Bacteria                   |
| ASV548  | Bacteria | Proteobacteria | Deltaproteobacteria | Bdellovibrionales | Bacteriovoracaceae | Bacteriovoracaceae | Bacteriovoracaceae         |
| ASV1278 | Bacteria | Proteobacteria | Deltaproteobacteria | Bdellovibrionales | Bacteriovoracaceae | Halobacteriovorax  | Halobacteriovorax          |
| ASV1627 | Bacteria | Spirochaetes   | Spirochaetia        | Spirochaetales    | Spirochaetaceae    | Treponema          | Treponema                  |
| ASV512  | Bacteria | Firmicutes     | Firmicutes          | Firmicutes        | Firmicutes         | Firmicutes_G-1     | Firmicutes_G-1             |
| ASV1149 | Bacteria | Firmicutes     | Firmicutes          | Firmicutes        | Firmicutes         | Firmicutes_G-1     | Firmicutes_G-1             |
| ASV819  | Bacteria | Firmicutes     | Firmicutes          | Firmicutes        | Firmicutes         | Firmicutes_G-1     | Firmicutes_G-1             |
| ASV918  | Bacteria | Firmicutes     | Firmicutes          | Firmicutes        | Firmicutes         | Firmicutes_G-1     | Firmicutes_G-1             |
| ASV1615 | Bacteria | Firmicutes     | Firmicutes          | Firmicutes        | Firmicutes         | Firmicutes_G-1     | Firmicutes_G-1             |
| ASV1290 | Bacteria | Firmicutes     | Firmicutes          | Firmicutes        | Firmicutes         | Firmicutes_G-1     | Firmicutes_G-1             |
| ASV1023 | Bacteria | Firmicutes     | Firmicutes          | Firmicutes        | Firmicutes         | Firmicutes_G-1     | Firmicutes_G-1_sp._COT_309 |
| ASV1157 | Bacteria | Firmicutes     | Firmicutes          | Firmicutes        | Firmicutes         | Firmicutes_G-1     | Firmicutes_G-1             |
| ASV1531 | Bacteria | Acidobacteria  | Acidobacteria_Gp3   | Gp3               | Gp3                | Gp3                | Gp3                        |



|         |          |                |                     |                     |                        |                        |                                    |
|---------|----------|----------------|---------------------|---------------------|------------------------|------------------------|------------------------------------|
| ASV705  | Bacteria | Proteobacteria | Deltaproteobacteria | Myxococcales        | Polyangiaceae          | Chondromyces           | Chondromyces                       |
| ASV667  | Bacteria | Proteobacteria | Deltaproteobacteria | Myxococcales        | Polyangiaceae          | Chondromyces           | Chondromyces                       |
| ASV1449 | Bacteria | Proteobacteria | Deltaproteobacteria | Myxococcales        | Polyangiaceae          | Chondromyces           | Chondromyces                       |
| ASV1474 | Bacteria | Proteobacteria | Deltaproteobacteria | Deltaproteobacteria | Deltaproteobacteria    | Deltaproteobacteria    | Deltaproteobacteria                |
| ASV446  | Bacteria | Proteobacteria | Deltaproteobacteria | Desulfovibrionales  | Desulfovibrionales_F-1 | Desulfovibrionales_G-1 | Desulfovibrionales_G-1             |
| ASV688  | Bacteria | Proteobacteria | Deltaproteobacteria | Desulfovibrionales  | Desulfovibrionales_F-1 | Desulfovibrionales_G-1 | Desulfovibrionales_G-1             |
| ASV367  | Bacteria | Proteobacteria | Deltaproteobacteria | Desulfovibrionales  | Desulfovibrionales_F-1 | Desulfovibrionales_G-1 | Desulfovibrionales_G-1_sp._COT_009 |
| ASV1248 | Bacteria | Proteobacteria | Deltaproteobacteria | Desulfovibrionales  | Desulfovibrionales_F-1 | Desulfovibrionales_G-1 | Desulfovibrionales_G-1             |
| ASV1213 | Bacteria | Proteobacteria | Deltaproteobacteria | Desulfovibrionales  | Desulfovibrionales_F-1 | Desulfovibrionales_G-1 | Desulfovibrionales_G-1             |
| ASV481  | Bacteria | Proteobacteria | Deltaproteobacteria | Desulfovibrionales  | Desulfovibrionales_F-1 | Desulfovibrionales_G-1 | Desulfovibrionales_G-1             |
| ASV1108 | Bacteria | Proteobacteria | Deltaproteobacteria | Desulfovibrionales  | Desulfovibrionales_F-1 | Desulfovibrionales_G-1 | Desulfovibrionales_G-1             |
| ASV694  | Bacteria | Proteobacteria | Deltaproteobacteria | Desulfovibrionales  | Desulfovibrionaceae    | Desulfovibrionaceae    | Desulfovibrionaceae                |
| ASV37   | Bacteria | Proteobacteria | Deltaproteobacteria | Desulfovibrionales  | Desulfomicrobiaceae    | Desulfomicrobium       | Desulfomicrobium_orale             |
| ASV47   | Bacteria | Proteobacteria | Deltaproteobacteria | Desulfovibrionales  | Desulfomicrobiaceae    | Desulfomicrobium       | Desulfomicrobium                   |
| ASV570  | Bacteria | Proteobacteria | Deltaproteobacteria | Desulfovibrionales  | Desulfomicrobiaceae    | Desulfomicrobium       | Desulfomicrobium                   |
| ASV143  | Bacteria | Proteobacteria | Deltaproteobacteria | Desulfovibrionales  | Desulfomicrobiaceae    | Desulfomicrobium       | Desulfomicrobium                   |
| ASV1749 | Bacteria | Proteobacteria | Deltaproteobacteria | Desulfovibrionales  | Desulfomicrobiaceae    | Desulfomicrobium       | Desulfomicrobium                   |

|         |          |                |                     |                    |                      |                          |                           |
|---------|----------|----------------|---------------------|--------------------|----------------------|--------------------------|---------------------------|
| ASV1596 | Bacteria | Proteobacteria | Deltaproteobacteria | Desulfovibrionales | Desulfovibrionaceae  | Desulfovibrio            | Desulfovibrio             |
| ASV649  | Bacteria | Proteobacteria | Deltaproteobacteria | Desulfovibrionales | Desulfovibrionaceae  | Desulfovibrio            | Desulfovibrio_sp._HMT_040 |
| ASV743  | Bacteria | Proteobacteria | Deltaproteobacteria | Desulfovibrionales | Desulfovibrionaceae  | Desulfovibrio            | Desulfovibrio             |
| ASV36   | Bacteria | Proteobacteria | Deltaproteobacteria | Desulfovibrionales | Desulfovibrionaceae  | Desulfovibrio            | Desulfovibrio             |
| ASV38   | Bacteria | Proteobacteria | Deltaproteobacteria | Desulfovibrionales | Desulfovibrionaceae  | Desulfovibrio            | Desulfovibrio             |
| ASV161  | Bacteria | Proteobacteria | Deltaproteobacteria | Desulfovibrionales | Desulfovibrionaceae  | Desulfovibrio            | Desulfovibrio             |
| ASV225  | Bacteria | Proteobacteria | Deltaproteobacteria | Desulfovibrionales | Desulfovibrionaceae  | Desulfovibrio            | Desulfovibrio             |
| ASV216  | Bacteria | Firmicutes     | Clostridia          | Clostridiales      | Lachnospiraceae_XIVa | Lachnospiraceae_XIVa_G-3 | Lachnospiraceae_XIVa_G-3  |
| ASV524  | Bacteria | Firmicutes     | Clostridia          | Clostridiales      | Lachnospiraceae_XIVa | Lachnospiraceae_XIVa_G-3 | Lachnospiraceae_XIVa_G-3  |
| ASV718  | Bacteria | Firmicutes     | Clostridia          | Clostridiales      | Lachnospiraceae_XIVa | Lachnospiraceae_XIVa_G-3 | Lachnospiraceae_XIVa_G-3  |
| ASV274  | Bacteria | Firmicutes     | Clostridia          | Clostridiales      | Lachnospiraceae_XIVa | Lachnospiraceae_XIVa_G-3 | Lachnospiraceae_XIVa_G-3  |
| ASV410  | Bacteria | Firmicutes     | Clostridia          | Clostridiales      | Lachnospiraceae_XIVa | Lachnospiraceae_XIVa_G-3 | Lachnospiraceae_XIVa_G-3  |
| ASV1214 | Bacteria | Firmicutes     | Clostridia          | Clostridiales      | Lachnospiraceae_XIVa | Lachnospiraceae_XIVa_G-7 | Lachnospiraceae_XIVa_G-7  |
| ASV635  | Bacteria | Firmicutes     | Clostridia          | Clostridiales      | Lachnospiraceae_XIVa | Lachnospiraceae_XIVa_G-7 | Lachnospiraceae_XIVa_G-7  |
| ASV1112 | Bacteria | Firmicutes     | Clostridia          | Clostridiales      | Lachnospiraceae_XIVa | Lachnospiraceae_XIVa_G-1 | Lachnospiraceae_XIVa_G-1  |
| ASV1347 | Bacteria | Firmicutes     | Clostridia          | Clostridiales      | Lachnospiraceae_XIVa | Lachnospiraceae_XIVa_G-1 | Lachnospiraceae_XIVa_G-1  |
| ASV640  | Bacteria | Firmicutes     | Clostridia          | Clostridiales      | Lachnospiraceae_XIVa | Lachnospiraceae_XIVa_G-2 | Lachnospiraceae_XIVa_G-2  |

|         |          |            |            |               |                           |                              |                              |
|---------|----------|------------|------------|---------------|---------------------------|------------------------------|------------------------------|
| ASV431  | Bacteria | Firmicutes | Clostridia | Clostridiales | Lachnospiraceae_XIV<br>a  | Lachnospiraceae_<br>XIVa_G-2 | Lachnospiraceae_XIVa_<br>G-2 |
| ASV1505 | Bacteria | Firmicutes | Clostridia | Clostridiales | Lachnospiraceae_XIV<br>a  | Lachnospiraceae_<br>XIVa_G-2 | Lachnospiraceae_XIVa_<br>G-2 |
| ASV1247 | Bacteria | Firmicutes | Clostridia | Clostridiales | Clostridiales             | Clostridiales                | Clostridiales                |
| ASV1356 | Bacteria | Firmicutes | Clostridia | Clostridiales | Lachnospiraceae           | Clostridium_XIV<br>a         | Clostridium_XIVa             |
| ASV663  | Bacteria | Firmicutes | Clostridia | Clostridiales | Lachnospiraceae_XIV<br>a  | Blautia                      | Blautia_sp._COT_337          |
| ASV1636 | Bacteria | Firmicutes | Clostridia | Clostridiales | Lachnospiraceae_XIV<br>a  | Blautia                      | Blautia                      |
| ASV1389 | Bacteria | Firmicutes | Clostridia | Clostridiales | Lachnospiraceae_XIV<br>a  | Blautia                      | Blautia                      |
| ASV1012 | Bacteria | Firmicutes | Clostridia | Clostridiales | Lachnospiraceae           | Ruminococcus2                | Ruminococcus2                |
| ASV1469 | Bacteria | Firmicutes | Clostridia | Clostridiales | Lachnospiraceae           | Blautia                      | Blautia                      |
| ASV1520 | Bacteria | Firmicutes | Clostridia | Clostridiales | Lachnospiraceae           | Blautia                      | Blautia                      |
| ASV1192 | Bacteria | Firmicutes | Clostridia | Clostridiales | Lachnospiraceae_[XI<br>V] | Lachnospiraceae_<br>[G-10]   | Lachnospiraceae_[G-10]       |
| ASV1494 | Bacteria | Firmicutes | Clostridia | Clostridiales | Lachnospiraceae_[XI<br>V] | Lachnospiraceae_<br>[G-10]   | Lachnospiraceae_[G-10]       |
| ASV890  | Bacteria | Firmicutes | Clostridia | Clostridiales | Lachnospiraceae_XIV<br>a  | Catonella                    | Catonella_sp._COT_048        |
| ASV55   | Bacteria | Firmicutes | Clostridia | Clostridiales | Lachnospiraceae_XIV<br>a  | Catonella                    | Catonella_sp._COT_158        |
| ASV1436 | Bacteria | Firmicutes | Clostridia | Clostridiales | Lachnospiraceae_XIV<br>a  | Catonella                    | Catonella                    |
| ASV1598 | Bacteria | Firmicutes | Clostridia | Clostridiales | Lachnospiraceae_XIV<br>a  | Catonella                    | Catonella                    |
| ASV354  | Bacteria | Firmicutes | Clostridia | Clostridiales | Lachnospiraceae_XIV<br>a  | Catonella                    | Catonella_sp._COT_025        |
| ASV502  | Bacteria | Firmicutes | Clostridia | Clostridiales | Lachnospiraceae_XIV<br>a  | Catonella                    | Catonella                    |
| ASV1358 | Bacteria | Firmicutes | Clostridia | Clostridiales | Lachnospiraceae_[XI<br>V] | Catonella                    | Catonella                    |

|         |          |            |            |               |                          |                              |                              |
|---------|----------|------------|------------|---------------|--------------------------|------------------------------|------------------------------|
| ASV163  | Bacteria | Firmicutes | Clostridia | Clostridiales | Lachnospiraceae_XIV<br>a | Catonella                    | Catonella                    |
| ASV298  | Bacteria | Firmicutes | Clostridia | Clostridiales | Lachnospiraceae_XIV<br>a | Catonella                    | Catonella_sp._COT_257        |
| ASV448  | Bacteria | Firmicutes | Clostridia | Clostridiales | Lachnospiraceae_XIV<br>a | Catonella                    | Catonella                    |
| ASV1196 | Bacteria | Firmicutes | Clostridia | Clostridiales | Lachnospiraceae_XIV<br>a | Catonella                    | Catonella                    |
| ASV556  | Bacteria | Firmicutes | Clostridia | Clostridiales | Lachnospiraceae_XIV<br>a | Catonella                    | Catonella                    |
| ASV151  | Bacteria | Firmicutes | Clostridia | Clostridiales | Lachnospiraceae_XIV<br>a | Catonella                    | Catonella_sp._COT_160        |
| ASV483  | Bacteria | Firmicutes | Clostridia | Clostridiales | Lachnospiraceae_XIV<br>a | Catonella                    | Catonella                    |
| ASV697  | Bacteria | Firmicutes | Clostridia | Clostridiales | Lachnospiraceae          | Lachnospiraceae              | Lachnospiraceae              |
| ASV970  | Bacteria | Firmicutes | Clostridia | Clostridiales | Lachnospiraceae          | Lachnospiraceae              | Lachnospiraceae              |
| ASV1060 | Bacteria | Firmicutes | Clostridia | Clostridiales | Clostridiales            | Clostridiales                | Clostridiales                |
| ASV1137 | Bacteria | Firmicutes | Clostridia | Clostridiales | Clostridiales            | Clostridiales                | Clostridiales                |
| ASV848  | Bacteria | Firmicutes | Clostridia | Clostridiales | Lachnospiraceae_XIV<br>a | Lachnospiraceae_<br>XIVa_G-4 | Lachnospiraceae_XIVa_<br>G-4 |
| ASV357  | Bacteria | Firmicutes | Clostridia | Clostridiales | Lachnospiraceae_XIV<br>a | Lachnospiraceae_<br>XIVa_G-4 | Lachnospiraceae_XIVa_<br>G-4 |
| ASV616  | Bacteria | Firmicutes | Clostridia | Clostridiales | Lachnospiraceae_XIV<br>a | Lachnospiraceae_<br>XIVa_G-4 | Lachnospiraceae_XIVa_<br>G-4 |
| ASV60   | Bacteria | Firmicutes | Clostridia | Clostridiales | Lachnospiraceae_XIV<br>a | Lachnospiraceae_<br>XIVa_G-5 | Lachnospiraceae_XIVa_<br>G-5 |
| ASV358  | Bacteria | Firmicutes | Clostridia | Clostridiales | Lachnospiraceae_XIV<br>a | Lachnospiraceae_<br>XIVa_G-5 | Lachnospiraceae_XIVa_<br>G-5 |
| ASV242  | Bacteria | Firmicutes | Clostridia | Clostridiales | Lachnospiraceae_XIV<br>a | Lachnospiraceae_<br>XIVa_G-5 | Lachnospiraceae_XIVa_<br>G-5 |
| ASV1574 | Bacteria | Firmicutes | Clostridia | Clostridiales | Lachnospiraceae_XIV<br>a | Lachnospiraceae_<br>XIVa_G-5 | Lachnospiraceae_XIVa_<br>G-5 |
| ASV1610 | Bacteria | Firmicutes | Clostridia | Clostridiales | Lachnospiraceae_XIV<br>a | Lachnospiraceae_<br>XIVa_G-6 | Lachnospiraceae_XIVa_<br>G-6 |



|         |          |            |            |               |                      |                          |                          |
|---------|----------|------------|------------|---------------|----------------------|--------------------------|--------------------------|
| ASV1197 | Bacteria | Firmicutes | Clostridia | Clostridiales | Lachnospiraceae_XIVa | Lachnospiraceae_XIVa_G-6 | Lachnospiraceae_XIVa_G-6 |
| ASV1281 | Bacteria | Firmicutes | Clostridia | Clostridiales | Lachnospiraceae_XIVa | Lachnospiraceae_XIVa_G-6 | Lachnospiraceae_XIVa_G-6 |
| ASV21   | Bacteria | Firmicutes | Clostridia | Clostridiales | Lachnospiraceae_XIVa | Lachnospiraceae_XIVa_G-6 | Lachnospiraceae_XIVa_G-6 |
| ASV133  | Bacteria | Firmicutes | Clostridia | Clostridiales | Lachnospiraceae_XIVa | Lachnospiraceae_XIVa_G-6 | Lachnospiraceae_XIVa_G-6 |
| ASV1122 | Bacteria | Firmicutes | Clostridia | Clostridiales | Lachnospiraceae_XIVa | Lachnospiraceae_XIVa_G-6 | Lachnospiraceae_XIVa_G-6 |
| ASV92   | Bacteria | Firmicutes | Clostridia | Clostridiales | Lachnospiraceae_XIVa | Lachnospiraceae_XIVa_G-6 | Lachnospiraceae_XIVa_G-6 |
| ASV165  | Bacteria | Firmicutes | Clostridia | Clostridiales | Lachnospiraceae_XIVa | Lachnospiraceae_XIVa_G-6 | Lachnospiraceae_XIVa_G-6 |
| ASV425  | Bacteria | Firmicutes | Clostridia | Clostridiales | Lachnospiraceae_XIVa | Lachnospiraceae_XIVa_G-6 | Lachnospiraceae_XIVa_G-6 |
| ASV1114 | Bacteria | Firmicutes | Clostridia | Clostridiales | Lachnospiraceae_XIVa | Lachnospiraceae_XIVa_G-6 | Lachnospiraceae_XIVa_G-6 |
| ASV539  | Bacteria | Firmicutes | Clostridia | Clostridiales | Lachnospiraceae_XIVa | Lachnospiraceae_XIVa_G-6 | Lachnospiraceae_XIVa_G-6 |
| ASV215  | Bacteria | Firmicutes | Clostridia | Clostridiales | Lachnospiraceae_XIVa | Lachnospiraceae_XIVa_G-6 | Lachnospiraceae_XIVa_G-6 |
| ASV704  | Bacteria | Firmicutes | Clostridia | Clostridiales | Lachnospiraceae_XIVa | Lachnospiraceae_XIVa_G-6 | Lachnospiraceae_XIVa_G-6 |
| ASV1262 | Bacteria | Firmicutes | Clostridia | Clostridiales | Lachnospiraceae      | Lachnospiraceae          | Lachnospiraceae          |
| ASV1679 | Bacteria | Firmicutes | Clostridia | Clostridiales | Lachnospiraceae      | Lachnospiraceae          | Lachnospiraceae          |
| ASV875  | Bacteria | Firmicutes | Clostridia | Clostridiales | Clostridiales_IV     | Faecalibacterium         | Faecalibacterium         |
| ASV1597 | Bacteria | Firmicutes | Clostridia | Clostridiales | Clostridiales_IV     | Clostridiales_IV_G-3     | Clostridiales_IV_G-3     |
| ASV1690 | Bacteria | Firmicutes | Clostridia | Clostridiales | Ruminococcaceae      | Anaerotruncus            | Anaerotruncus            |
| ASV1194 | Bacteria | Firmicutes | Clostridia | Clostridiales | Ruminococcaceae      | Ruminococcaceae          | Ruminococcaceae          |
| ASV1388 | Bacteria | Firmicutes | Clostridia | Clostridiales | Ruminococcaceae      | Acetanaerobacterium      | Acetanaerobacterium      |

|         |          |               |             |               |                   |                       |                               |
|---------|----------|---------------|-------------|---------------|-------------------|-----------------------|-------------------------------|
| ASV247  | Bacteria | Firmicutes    | Clostridia  | Clostridiales | Clostridiales_III | Clostridiales_III_G-3 | Clostridiales_III_G-3         |
| ASV1014 | Bacteria | Firmicutes    | Clostridia  | Clostridiales | Clostridiales_III | Clostridiales_III_G-3 | Clostridiales_III_G-3         |
| ASV599  | Bacteria | Firmicutes    | Clostridia  | Clostridiales | Clostridiales_III | Clostridiales_III_G-2 | Clostridiales_III_G-2         |
| ASV832  | Bacteria | Firmicutes    | Clostridia  | Clostridiales | Clostridiales_III | Clostridiales_III_G-2 | Clostridiales_III_G-2         |
| ASV1611 | Bacteria | Firmicutes    | Clostridia  | Clostridiales | Clostridiales     | Clostridiales         | Clostridiales                 |
| ASV292  | Bacteria | Firmicutes    | Clostridia  | Clostridiales | Clostridiales_III | Clostridiales_III_G-1 | Clostridiales_III_G-1         |
| ASV703  | Bacteria | Firmicutes    | Clostridia  | Clostridiales | Clostridiales_III | Clostridiales_III_G-1 | Clostridiales_III_G-1         |
| ASV742  | Bacteria | Firmicutes    | Clostridia  | Clostridiales | Clostridiales_III | Clostridiales_III_G-1 | Clostridiales_III_G-1         |
| ASV529  | Bacteria | Firmicutes    | Clostridia  | Clostridiales | Clostridiales_IV  | Clostridiales_IV_G-2  | Clostridiales_IV_G-2          |
| ASV761  | Bacteria | Firmicutes    | Clostridia  | Clostridiales | Clostridiales_IV  | Clostridiales_IV_G-2  | Clostridiales_IV_G-2          |
| ASV1514 | Bacteria | Firmicutes    | Clostridia  | Clostridiales | Ruminococcaceae   | Ruminococcaceae       | Ruminococcaceae               |
| ASV1548 | Bacteria | Firmicutes    | Clostridia  | Clostridiales | Ruminococcaceae   | Ruminococcaceae       | Ruminococcaceae               |
| ASV281  | Bacteria | Firmicutes    | Clostridia  | Clostridiales | Clostridiales_IV  | Clostridiales_IV_G-1  | Clostridiales_IV_G-1          |
| ASV643  | Bacteria | Firmicutes    | Clostridia  | Clostridiales | Clostridiales_IV  | Clostridiales_IV_G-1  | Clostridiales_IV_G-1          |
| ASV859  | Bacteria | Firmicutes    | Clostridia  | Clostridiales | Ruminococcaceae   | Intestinimonas        | Intestinimonas                |
| ASV707  | Bacteria | Firmicutes    | Clostridia  | Clostridiales | Ruminococcaceae   | Intestinimonas        | Intestinimonas                |
| ASV750  | Bacteria | Firmicutes    | Clostridia  | Clostridiales | Ruminococcaceae   | Intestinimonas        | Intestinimonas                |
| ASV935  | Bacteria | Synergistetes | Synergistia | Synergistales | Synergistales_F-1 | Synergistales_G-1     | Synergistales_G-1_sp._COT_180 |
| ASV1231 | Bacteria | Synergistetes | Synergistia | Synergistales | Synergistales_F-1 | Synergistales_G-1     | Synergistales_G-1             |
| ASV811  | Bacteria | Synergistetes | Synergistia | Synergistales | Synergistales_F-1 | Synergistales_G-1     | Synergistales_G-1             |
| ASV33   | Bacteria | Synergistetes | Synergistia | Synergistales | Synergistales_F-1 | Synergistales_G-1     | Synergistales_G-1             |

|         |          |               |             |               |                   |                   |                               |
|---------|----------|---------------|-------------|---------------|-------------------|-------------------|-------------------------------|
| ASV715  | Bacteria | Synergistetes | Synergistia | Synergistales | Synergistales_F-1 | Synergistales_G-1 | Synergistales_G-1             |
| ASV753  | Bacteria | Synergistetes | Synergistia | Synergistales | Synergistales_F-1 | Synergistales_G-1 | Synergistales_G-1             |
| ASV959  | Bacteria | Synergistetes | Synergistia | Synergistales | Synergistales_F-1 | Synergistales_G-1 | Synergistales_G-1             |
| ASV913  | Bacteria | Synergistetes | Synergistia | Synergistales | Synergistales_F-1 | Synergistales_G-1 | Synergistales_G-1             |
| ASV1088 | Bacteria | Synergistetes | Synergistia | Synergistales | Synergistales_F-1 | Synergistales_G-1 | Synergistales_G-1             |
| ASV855  | Bacteria | Synergistetes | Synergistia | Synergistales | Synergistales_F-1 | Synergistales_G-1 | Synergistales_G-1             |
| ASV805  | Bacteria | Synergistetes | Synergistia | Synergistales | Synergistales_F-1 | Synergistales_G-1 | Synergistales_G-1             |
| ASV19   | Bacteria | Synergistetes | Synergistia | Synergistales | Synergistales_F-1 | Synergistales_G-1 | Synergistales_G-1_sp._COT_178 |
| ASV81   | Bacteria | Synergistetes | Synergistia | Synergistales | Synergistales_F-1 | Synergistales_G-1 | Synergistales_G-1             |
| ASV566  | Bacteria | Synergistetes | Synergistia | Synergistales | Synergistales_F-1 | Synergistales_G-1 | Synergistales_G-1             |
| ASV1287 | Bacteria | Synergistetes | Synergistia | Synergistales | Synergistales_F-1 | Synergistales_G-1 | Synergistales_G-1             |
| ASV344  | Bacteria | Synergistetes | Synergistia | Synergistales | Synergistales_F-1 | Synergistales_G-1 | Synergistales_G-1             |
| ASV919  | Bacteria | Synergistetes | Synergistia | Synergistales | Synergistales_F-1 | Synergistales_G-1 | Synergistales_G-1_sp._COT_094 |
| ASV1025 | Bacteria | Synergistetes | Synergistia | Synergistales | Synergistales_F-1 | Synergistales_G-1 | Synergistales_G-1             |
| ASV251  | Bacteria | Synergistetes | Synergistia | Synergistales | Synergistales_F-1 | Synergistales_G-1 | Synergistales_G-1             |
| ASV816  | Bacteria | Synergistetes | Synergistia | Synergistales | Synergistaceae    | Fretibacterium    | Fretibacterium_sp._HMT_361    |
| ASV1256 | Bacteria | Synergistetes | Synergistia | Synergistales | Synergistales_F-1 | Synergistales_G-1 | Synergistales_G-1             |
| ASV1406 | Bacteria | Synergistetes | Synergistia | Synergistales | Synergistaceae    | Fretibacterium    | Fretibacterium                |
| ASV328  | Bacteria | Synergistetes | Synergistia | Synergistales | Synergistales_F-1 | Synergistales_G-1 | Synergistales_G-1             |
| ASV1313 | Bacteria | Synergistetes | Synergistia | Synergistales | Synergistaceae    | Fretibacterium    | Fretibacterium_sp._HMT_362    |
| ASV1339 | Bacteria | Synergistetes | Synergistia | Synergistales | Synergistales     | Synergistales     | Synergistales                 |
| ASV586  | Bacteria | Synergistetes | Synergistia | Synergistales | Synergistaceae    | Fretibacterium    | Fretibacterium_fastidiosum    |
| ASV670  | Bacteria | Synergistetes | Synergistia | Synergistales | Synergistaceae    | Fretibacterium    | Fretibacterium                |
| ASV1594 | Bacteria | Synergistetes | Synergistia | Synergistales | Synergistales_F-1 | Synergistales_G-1 | Synergistales_G-1             |
| ASV1638 | Bacteria | Synergistetes | Synergistia | Synergistales | Synergistales_F-1 | Synergistales_G-1 | Synergistales_G-1             |

|         |          |                |                     |                   |                            |                                 |                                 |
|---------|----------|----------------|---------------------|-------------------|----------------------------|---------------------------------|---------------------------------|
| ASV1303 | Bacteria | Synergistetes  | Synergistia         | Synergistales     | Synergistales_F-1          | Synergistales_G-1               | Synergistales_G-1               |
| ASV639  | Bacteria | Synergistetes  | Synergistia         | Synergistales     | Synergistales_F-1          | Synergistales_G-1               | Synergistales_G-1               |
| ASV692  | Bacteria | Synergistetes  | Synergistia         | Synergistales     | Synergistales_F-1          | Synergistales_G-1               | Synergistales_G-1               |
| ASV1501 | Bacteria | Synergistetes  | Synergistia         | Synergistales     | Synergistales_F-1          | Synergistales_G-1               | Synergistales_G-1               |
| ASV1623 | Bacteria | Synergistetes  | Synergistia         | Synergistales     | Synergistales_F-1          | Synergistales_G-1               | Synergistales_G-1               |
| ASV1720 | Bacteria | Synergistetes  | Synergistia         | Synergistales     | Synergistales_F-1          | Synergistales_G-1               | Synergistales_G-1               |
| ASV1481 | Bacteria | Synergistetes  | Synergistia         | Synergistales     | Synergistales_F-1          | Synergistales_G-1               | Synergistales_G-1               |
| ASV1508 | Bacteria | Synergistetes  | Synergistia         | Synergistales     | Synergistales_F-1          | Synergistales_G-1               | Synergistales_G-1               |
| ASV1682 | Bacteria | Synergistetes  | Synergistia         | Synergistales     | Synergistales              | Synergistales                   | Synergistales                   |
| ASV1404 | Bacteria | Synergistetes  | Synergistia         | Synergistales     | Dethiosulfovibrionaceae    | Pyramidobacter                  | Pyramidobacter                  |
| ASV1699 | Bacteria | Synergistetes  | Synergistia         | Synergistales     | Synergistaceae             | Aminivibrio                     | Aminivibrio                     |
| ASV248  | Bacteria | Synergistetes  | Synergistia         | Synergistales     | Synergistales_F-2          | Synergistales_G-2               | Synergistales_G-2_sp._COT_138   |
| ASV1009 | Bacteria | Synergistetes  | Synergistia         | Synergistales     | Synergistaceae             | Synergistes                     | Synergistes                     |
| ASV809  | Bacteria | Firmicutes     | Clostridia          | Clostridiales     | Syntrophomonadaceae_[VIII] | Syntrophomonadaceae_[VIII][G-1] | Syntrophomonadaceae_[VIII][G-1] |
| ASV1632 | Bacteria | Firmicutes     | Clostridia          | Clostridiales     | Clostridiales              | Clostridiales                   | Clostridiales                   |
| ASV1362 | Bacteria | Proteobacteria | Deltaproteobacteria | Desulfobacterales | Desulfobulbaceae           | Desulfobulbus                   | Desulfobulbus                   |
| ASV1512 | Bacteria | Proteobacteria | Deltaproteobacteria | Desulfobacterales | Desulfobulbaceae           | Desulfobulbus                   | Desulfobulbus                   |
| ASV462  | Bacteria | Proteobacteria | Deltaproteobacteria | Desulfobacterales | Desulfobulbaceae           | Desulfobulbus                   | Desulfobulbus_sp._COT_078       |
| ASV1071 | Bacteria | Proteobacteria | Deltaproteobacteria | Desulfobacterales | Desulfobulbaceae           | Desulfobulbus                   | Desulfobulbus                   |
| ASV740  | Bacteria | Proteobacteria | Deltaproteobacteria | Desulfobacterales | Desulfobulbaceae           | Desulfobulbus                   | Desulfobulbus                   |
| ASV1030 | Bacteria | Proteobacteria | Deltaproteobacteria | Desulfobacterales | Desulfobulbaceae           | Desulfobulbus                   | Desulfobulbus                   |
| ASV1141 | Bacteria | Proteobacteria | Deltaproteobacteria | Desulfobacterales | Desulfobulbaceae           | Desulfobulbus                   | Desulfobulbus                   |

|         |          |                |                     |                   |                   |                       |                       |
|---------|----------|----------------|---------------------|-------------------|-------------------|-----------------------|-----------------------|
| ASV1408 | Bacteria | Proteobacteria | Deltaproteobacteria | Desulfobacterales | Desulfobulbaceae  | Desulfobulbus         | Desulfobulbus         |
| ASV1684 | Bacteria | Chlorobi       | Chlorobi_C-1        | Chlorobi_O-1      | Chlorobi_F-1      | Chlorobi_G-1          | Chlorobi_G-1          |
| ASV1711 | Bacteria | Chlorobi       | Chlorobi_C-1        | Chlorobi_O-1      | Chlorobi_F-1      | Chlorobi_G-1          | Chlorobi_G-1          |
| ASV696  | Bacteria | Firmicutes     | Clostridia          | Clostridiales     | Clostridiales_F-2 | Clostridiales_F-2,G-1 | Clostridiales_F-2,G-1 |
| ASV1369 | Bacteria | Firmicutes     | Clostridia          | Clostridiales     | Clostridiales_F-2 | Clostridiales_F-2,G-1 | Clostridiales_F-2,G-1 |
| ASV269  | Bacteria | Firmicutes     | Clostridia          | Clostridiales     | Clostridiales_F-2 | Clostridiales_F-2,G-1 | Clostridiales_F-2,G-1 |
| ASV86   | Bacteria | Firmicutes     | Clostridia          | Clostridiales     | Clostridiales_F-2 | Clostridiales_F-2,G-1 | Clostridiales_F-2,G-1 |
| ASV810  | Bacteria | Firmicutes     | Clostridia          | Clostridiales     | Clostridiales_F-2 | Clostridiales_F-2,G-1 | Clostridiales_F-2,G-1 |
| ASV1756 | Bacteria | Firmicutes     | Clostridia          | Clostridiales     | Clostridiales_F-2 | Clostridiales_F-2,G-1 | Clostridiales_F-2,G-1 |
| ASV390  | Bacteria | Firmicutes     | Clostridia          | Clostridiales     | Clostridiales_F-2 | Clostridiales_F-2,G-2 | Clostridiales_F-2,G-2 |
| ASV1252 | Bacteria | Firmicutes     | Clostridia          | Clostridiales     | Clostridiales_F-2 | Clostridiales_F-2,G-3 | Clostridiales_F-2,G-3 |
| ASV1702 | Bacteria | Firmicutes     | Clostridia          | Clostridiales     | Clostridiales_F-2 | Clostridiales_F-2,G-3 | Clostridiales_F-2,G-3 |
| ASV1634 | Bacteria | Firmicutes     | Clostridia          | Clostridiales     | Clostridiales     | Clostridiales         | Clostridiales         |
| ASV404  | Bacteria | Firmicutes     | Clostridia          | Clostridiales     | Clostridiales_F-1 | Clostridiales_F-1,G-5 | Clostridiales_F-1,G-5 |
| ASV660  | Bacteria | Firmicutes     | Clostridia          | Clostridiales     | Clostridiales_F-1 | Clostridiales_F-1,G-6 | Clostridiales_F-1,G-6 |
| ASV879  | Bacteria | Firmicutes     | Clostridia          | Clostridiales     | Clostridiales_F-1 | Clostridiales_F-1,G-6 | Clostridiales_F-1,G-6 |
| ASV82   | Bacteria | Firmicutes     | Clostridia          | Clostridiales     | Clostridiales_F-1 | Clostridiales_F-1,G-2 | Clostridiales_F-1,G-2 |

|         |          |            |            |               |                          |                             |                              |
|---------|----------|------------|------------|---------------|--------------------------|-----------------------------|------------------------------|
| ASV1019 | Bacteria | Firmicutes | Clostridia | Clostridiales | Clostridiales_F-1        | Clostridiales_F-1,G-2       | Clostridiales_F-1,G-2        |
| ASV329  | Bacteria | Firmicutes | Clostridia | Clostridiales | Clostridiales_F-1        | Clostridiales_F-1,G-2       | Clostridiales_F-1,G-2        |
| ASV1162 | Bacteria | Firmicutes | Clostridia | Clostridiales | Clostridiales_F-1        | Clostridiales_F-1,G-2       | Clostridiales_F-1,G-2        |
| ASV304  | Bacteria | Firmicutes | Clostridia | Clostridiales | Clostridiales_F-1        | Clostridiales_F-1,G-2       | Clostridiales_F-1,G-2        |
| ASV677  | Bacteria | Firmicutes | Clostridia | Clostridiales | Clostridiales_F-1        | Clostridiales_F-1,G-2       | Clostridiales_F-1,G-2        |
| ASV1340 | Bacteria | Firmicutes | Clostridia | Clostridiales | Clostridiales_F-1        | Clostridiales_F-1,G-2       | Clostridiales_F-1,G-2        |
| ASV469  | Bacteria | Firmicutes | Clostridia | Clostridiales | Clostridiales_F-1        | Clostridiales_F-1,G-1       | Clostridiales_F-1,G-1        |
| ASV1445 | Bacteria | Firmicutes | Clostridia | Clostridiales | Clostridiales_F-1        | Clostridiales_F-1,G-1       | Clostridiales_F-1,G-1        |
| ASV736  | Bacteria | Firmicutes | Clostridia | Clostridiales | Clostridiales_F-1        | Clostridiales_F-1,G-1       | Clostridiales_F-1,G-1        |
| ASV1463 | Bacteria | Firmicutes | Clostridia | Clostridiales | Clostridiales_F-1        | Clostridiales_F-1,G-4       | Clostridiales_F-1,G-4        |
| ASV1545 | Bacteria | Firmicutes | Clostridia | Clostridiales | Clostridiales_F-1        | Clostridiales_F-1,G-4       | Clostridiales_F-1,G-4        |
| ASV1058 | Bacteria | Firmicutes | Clostridia | Clostridiales | Clostridiales_F-1        | Clostridiales_F-1,G-4       | Clostridiales_F-1,G-4        |
| ASV1076 | Bacteria | Firmicutes | Clostridia | Clostridiales | Clostridiales_F-1        | Clostridiales_F-1,G-4       | Clostridiales_F-1,G-4        |
| ASV1468 | Bacteria | Firmicutes | Clostridia | Clostridiales | Clostridiales            | Clostridiales               | Clostridiales                |
| ASV1697 | Bacteria | Firmicutes | Clostridia | Clostridiales | Christensenellaceae      | Christensenella             | Christensenella              |
| ASV50   | Bacteria | Firmicutes | Clostridia | Clostridiales | Peptostreptococcaceae_XI | Peptostreptococcaeae_XI_G-3 | Peptostreptococcaceae_XI_G-3 |
| ASV797  | Bacteria | Firmicutes | Clostridia | Clostridiales | Peptostreptococcaceae_XI | Peptostreptococcaeae_XI_G-3 | Peptostreptococcaceae_XI_G-3 |
| ASV439  | Bacteria | Firmicutes | Clostridia | Clostridiales | Peptostreptococcaceae_XI | Peptostreptococcaeae_XI_G-3 | Peptostreptococcaceae_XI_G-3 |

|         |          |            |            |               |                          |                             |                              |
|---------|----------|------------|------------|---------------|--------------------------|-----------------------------|------------------------------|
| ASV130  | Bacteria | Firmicutes | Clostridia | Clostridiales | Peptostreptococcaceae_XI | Peptostreptococcaeae_XI_G-3 | Peptostreptococcaceae_XI_G-3 |
| ASV365  | Bacteria | Firmicutes | Clostridia | Clostridiales | Peptostreptococcaceae_XI | Peptostreptococcaeae_XI_G-3 | Peptostreptococcaceae_XI_G-3 |
| ASV440  | Bacteria | Firmicutes | Clostridia | Clostridiales | Peptostreptococcaceae_XI | Peptostreptococcaeae_XI_G-3 | Peptostreptococcaceae_XI_G-3 |
| ASV630  | Bacteria | Firmicutes | Clostridia | Clostridiales | Peptostreptococcaceae_XI | Peptostreptococcaeae_XI_G-3 | Peptostreptococcaceae_XI_G-3 |
| ASV733  | Bacteria | Firmicutes | Clostridia | Clostridiales | Peptostreptococcaceae_XI | Peptostreptococcaeae_XI_G-3 | Peptostreptococcaceae_XI_G-3 |
| ASV181  | Bacteria | Firmicutes | Clostridia | Clostridiales | Peptostreptococcaceae_XI | Peptostreptococcaeae_XI_G-3 | Peptostreptococcaceae_XI_G-3 |
| ASV254  | Bacteria | Firmicutes | Clostridia | Clostridiales | Peptostreptococcaceae_XI | Peptostreptococcaeae_XI_G-3 | Peptostreptococcaceae_XI_G-3 |
| ASV393  | Bacteria | Firmicutes | Clostridia | Clostridiales | Peptostreptococcaceae_XI | Peptostreptococcaeae_XI_G-3 | Peptostreptococcaceae_XI_G-3 |
| ASV315  | Bacteria | Firmicutes | Clostridia | Clostridiales | Peptostreptococcaceae_XI | Peptostreptococcaeae_XI_G-3 | Peptostreptococcaceae_XI_G-3 |
| ASV1426 | Bacteria | Firmicutes | Clostridia | Clostridiales | Peptostreptococcaceae_XI | Peptostreptococcaeae_XI_G-3 | Peptostreptococcaceae_XI_G-3 |
| ASV1672 | Bacteria | Firmicutes | Clostridia | Clostridiales | Peptostreptococcaceae_XI | Peptostreptococcaeae_XI_G-3 | Peptostreptococcaceae_XI_G-3 |
| ASV494  | Bacteria | Firmicutes | Clostridia | Clostridiales | Peptostreptococcaceae_XI | Peptostreptococcaeae_XI_G-3 | Peptostreptococcaceae_XI_G-3 |
| ASV961  | Bacteria | Firmicutes | Clostridia | Clostridiales | Peptostreptococcaceae_XI | Peptostreptococcaeae_XI_G-3 | Peptostreptococcaceae_XI_G-3 |
| ASV186  | Bacteria | Firmicutes | Clostridia | Clostridiales | Peptostreptococcaceae_XI | Peptostreptococcaeae_XI_G-5 | Peptostreptococcaceae_XI_G-5 |
| ASV1255 | Bacteria | Firmicutes | Clostridia | Clostridiales | Peptostreptococcaceae_XI | Peptostreptococcaeae_XI_G-5 | Peptostreptococcaceae_XI_G-5 |
| ASV24   | Bacteria | Firmicutes | Clostridia | Clostridiales | Peptostreptococcaceae_XI | Peptostreptococcaeae_XI_G-5 | Peptostreptococcaceae_XI_G-5 |
| ASV80   | Bacteria | Firmicutes | Clostridia | Clostridiales | Peptostreptococcaceae_XI | Peptostreptococcaeae_XI_G-5 | Peptostreptococcaceae_XI_G-5 |

|         |          |            |            |               |                            |                               |                                |
|---------|----------|------------|------------|---------------|----------------------------|-------------------------------|--------------------------------|
| ASV555  | Bacteria | Firmicutes | Clostridia | Clostridiales | Peptostreptococcaceae_XI   | Peptostreptococcaeae_XI_G-5   | Peptostreptococcaceae_XI_G-5   |
| ASV1413 | Bacteria | Firmicutes | Clostridia | Clostridiales | Peptostreptococcaceae_XI   | Peptostreptococcaeae_XI_G-4   | Peptostreptococcaceae_XI_G-4   |
| ASV32   | Bacteria | Firmicutes | Clostridia | Clostridiales | Peptostreptococcaceae_XI   | Peptostreptococcaeae_XI_G-4   | Peptostreptococcaceae_XI_G-4   |
| ASV168  | Bacteria | Firmicutes | Clostridia | Clostridiales | Peptostreptococcaceae_XI   | Peptostreptococcaeae_XI_G-4   | Peptostreptococcaceae_XI_G-4   |
| ASV284  | Bacteria | Firmicutes | Clostridia | Clostridiales | Peptostreptococcaceae_XI   | Peptostreptococcaeae_XI_G-4   | Peptostreptococcaceae_XI_G-4   |
| ASV914  | Bacteria | Firmicutes | Clostridia | Clostridiales | Peptostreptococcaceae_XI   | Peptostreptococcaeae_XI_G-4   | Peptostreptococcaceae_XI_G-4   |
| ASV15   | Bacteria | Firmicutes | Clostridia | Clostridiales | Peptostreptococcaceae_XI   | Peptostreptococcaeae_XI_G-4   | Peptostreptococcaceae_XI_G-4   |
| ASV618  | Bacteria | Firmicutes | Clostridia | Clostridiales | Peptostreptococcaceae_XI   | Peptostreptococcaeae_XI_G-4   | Peptostreptococcaceae_XI_G-4   |
| ASV138  | Bacteria | Firmicutes | Clostridia | Clostridiales | Peptostreptococcaceae_XIII | Parvimonas                    | Parvimonas_sp._COT_035         |
| ASV179  | Bacteria | Firmicutes | Clostridia | Clostridiales | Peptostreptococcaceae_XIII | Parvimonas                    | Parvimonas                     |
| ASV113  | Bacteria | Firmicutes | Clostridia | Clostridiales | Peptostreptococcaceae_XIII | Parvimonas                    | Parvimonas_sp._COT_101         |
| ASV405  | Bacteria | Firmicutes | Clostridia | Clostridiales | Peptoniphilaceae           | Parvimonas                    | Parvimonas                     |
| ASV608  | Bacteria | Firmicutes | Clostridia | Clostridiales | Peptoniphilaceae           | Parvimonas                    | Parvimonas                     |
| ASV881  | Bacteria | Firmicutes | Clostridia | Clostridiales | Peptostreptococcaceae_XIII | Parvimonas                    | Parvimonas                     |
| ASV249  | Bacteria | Firmicutes | Clostridia | Clostridiales | Peptostreptococcaceae_XIII | Peptostreptococcaeae_XIII_G-1 | Peptostreptococcaceae_XIII_G-1 |
| ASV72   | Bacteria | Firmicutes | Clostridia | Clostridiales | Peptostreptococcaceae_XIII | Peptostreptococcaeae_XIII_G-1 | Peptostreptococcaceae_XIII_G-1 |
| ASV1561 | Bacteria | Firmicutes | Clostridia | Clostridiales | Peptostreptococcaceae_XIII | Peptostreptococcaeae_XIII_G-1 | Peptostreptococcaceae_XIII_G-1 |
| ASV747  | Bacteria | Firmicutes | Clostridia | Clostridiales | Peptostreptococcaceae_XIII | Peptoniphilus                 | Peptoniphilus                  |



|         |          |            |            |               |                                 |                            |                               |
|---------|----------|------------|------------|---------------|---------------------------------|----------------------------|-------------------------------|
| ASV139  | Bacteria | Firmicutes | Clostridia | Clostridiales | Peptoniphilaceae                | Peptoniphilaceae_[G-1]     | Peptoniphilaceae_[G-1]        |
| ASV1133 | Bacteria | Firmicutes | Clostridia | Clostridiales | Peptoniphilaceae                | Peptoniphilaceae_[G-1]     | Peptoniphilaceae_[G-1]        |
| ASV627  | Bacteria | Firmicutes | Clostridia | Clostridiales | Peptoniphilaceae                | Peptoniphilaceae_[G-2]     | Peptoniphilaceae_[G-2]        |
| ASV350  | Bacteria | Firmicutes | Clostridia | Clostridiales | Peptostreptococcaceae_XIII      | Tissierella                | Tissierella_sp._COT_029       |
| ASV359  | Bacteria | Firmicutes | Clostridia | Clostridiales | Peptostreptococcaceae_XIII      | Tissierella                | Tissierella                   |
| ASV258  | Bacteria | Firmicutes | Clostridia | Clostridiales | Peptostreptococcaceae_XIII      | Tissierella                | Tissierella_sp._COT_029       |
| ASV1016 | Bacteria | Firmicutes | Clostridia | Clostridiales | Peptostreptococcaceae_XIII      | Tissierella                | Tissierella                   |
| ASV828  | Bacteria | Firmicutes | Clostridia | Clostridiales | Peptostreptococcaceae_XIII      | Tissierella                | Tissierella                   |
| ASV122  | Bacteria | Firmicutes | Clostridia | Clostridiales | Peptostreptococcaceae_XIII      | Tissierella                | Tissierella                   |
| ASV1057 | Bacteria | Firmicutes | Clostridia | Clostridiales | Peptostreptococcaceae_XIII      | Tissierella                | Tissierella                   |
| ASV1458 | Bacteria | Firmicutes | Clostridia | Clostridiales | Clostridiales_Incertae_Sedis_XI | Tepidimicrobium            | Tepidimicrobium               |
| ASV814  | Bacteria | Firmicutes | Clostridia | Clostridiales | Clostridiales_Incertae_Sedis_XI | Murdochiella               | Murdochiella                  |
| ASV1097 | Bacteria | Firmicutes | Clostridia | Clostridiales | Clostridiales_Incertae_Sedis_XI | Murdochiella               | Murdochiella                  |
| ASV146  | Bacteria | Firmicutes | Clostridia | Clostridiales | Peptostreptococcaceae_XIII      | Helcococcus                | Helcococcus_sp._COT_140       |
| ASV131  | Bacteria | Firmicutes | Clostridia | Clostridiales | Peptostreptococcaceae_XIII      | Helcococcus                | Helcococcus                   |
| ASV782  | Bacteria | Firmicutes | Clostridia | Clostridiales | Peptostreptococcaceae_XIII      | Helcococcus                | Helcococcus                   |
| ASV442  | Bacteria | Firmicutes | Clostridia | Clostridiales | Peptostreptococcaceae_XI        | Peptostreptococcae_XI_G-11 | Peptostreptococcaceae_XI_G-11 |

|         |          |            |            |               |                            |                                |                                 |
|---------|----------|------------|------------|---------------|----------------------------|--------------------------------|---------------------------------|
| ASV1144 | Bacteria | Firmicutes | Clostridia | Clostridiales | Peptostreptococcaceae_XI   | Peptostreptococcaeae_XI_G-11   | Peptostreptococcaceae_XI_G-11   |
| ASV1315 | Bacteria | Firmicutes | Clostridia | Clostridiales | Peptostreptococcaceae_[XI] | Peptostreptococcaeae_[XI][G-1] | Peptostreptococcaceae_[XI][G-1] |
| ASV1470 | Bacteria | Firmicutes | Clostridia | Clostridiales | Peptostreptococcaceae_XI   | Peptostreptococcaeae_XI_G-6    | Peptostreptococcaceae_XI_G-6    |
| ASV974  | Bacteria | Firmicutes | Clostridia | Clostridiales | Peptostreptococcaceae_XI   | Peptostreptococcaeae_XI_G-6    | Peptostreptococcaceae_XI_G-6    |
| ASV1301 | Bacteria | Firmicutes | Clostridia | Clostridiales | Peptostreptococcaceae_XI   | Peptostreptococcaeae_XI_G-6    | Peptostreptococcaceae_XI_G-6    |
| ASV610  | Bacteria | Firmicutes | Clostridia | Clostridiales | Peptostreptococcaceae_XI   | Peptostreptococcaeae_XI_G-11   | Peptostreptococcaceae_XI_G-11   |
| ASV916  | Bacteria | Firmicutes | Clostridia | Clostridiales | Peptostreptococcaceae_[XI] | Peptostreptococcaeae_[XI][G-9] | Peptostreptococcaceae_[XI][G-9] |
| ASV1434 | Bacteria | Firmicutes | Clostridia | Clostridiales | Peptostreptococcaceae_XI   | Peptostreptococcaeae_XI_G-11   | Peptostreptococcaceae_XI_G-11   |
| ASV1379 | Bacteria | Firmicutes | Clostridia | Clostridiales | Clostridiales              | Clostridiales                  | Clostridiales                   |
| ASV1502 | Bacteria | Firmicutes | Clostridia | Clostridiales | Clostridiales              | Clostridiales                  | Clostridiales                   |
| ASV1234 | Bacteria | Firmicutes | Clostridia | Clostridiales | Peptostreptococcaceae_XI   | Peptostreptococcaeae_XI        | Peptostreptococcaceae_XI        |
| ASV104  | Bacteria | Firmicutes | Clostridia | Clostridiales | Peptostreptococcaceae_XI   | Peptostreptococcaeae_XI_G-6    | Peptostreptococcaceae_XI_G-6    |
| ASV213  | Bacteria | Firmicutes | Clostridia | Clostridiales | Peptostreptococcaceae_XI   | Peptostreptococcaeae_XI_G-12   | Peptostreptococcaceae_XI_G-12   |
| ASV451  | Bacteria | Firmicutes | Clostridia | Clostridiales | Peptostreptococcaceae_XI   | Peptostreptococcaeae_XI_G-7    | Peptostreptococcaceae_XI_G-7    |
| ASV709  | Bacteria | Firmicutes | Clostridia | Clostridiales | Peptostreptococcaceae_XI   | Peptostreptococcaeae_XI_G-7    | Peptostreptococcaceae_XI_G-7    |
| ASV140  | Bacteria | Firmicutes | Clostridia | Clostridiales | Peptostreptococcaceae_XI   | Peptostreptococcaeae_XI_G-10   | Peptostreptococcaceae_XI_G-10   |
| ASV471  | Bacteria | Firmicutes | Clostridia | Clostridiales | Peptostreptococcaceae_XI   | Peptostreptococcaeae_XI_G-10   | Peptostreptococcaceae_XI_G-10   |
| ASV998  | Bacteria | Firmicutes | Clostridia | Clostridiales | Peptostreptococcaceae_XI   | Peptostreptococcaeae_XI_G-10   | Peptostreptococcaceae_XI_G-10   |

|         |          |            |            |               |                            |                                |                                 |
|---------|----------|------------|------------|---------------|----------------------------|--------------------------------|---------------------------------|
| ASV1206 | Bacteria | Firmicutes | Clostridia | Clostridiales | Peptostreptococcaceae_XI   | Peptostreptococcaeae_XI_G-10   | Peptostreptococcaceae_XI_G-10   |
| ASV210  | Bacteria | Firmicutes | Clostridia | Clostridiales | Peptostreptococcaceae_XI   | Peptostreptococcaeae_XI_G-10   | Peptostreptococcaceae_XI_G-10   |
| ASV689  | Bacteria | Firmicutes | Clostridia | Clostridiales | Peptostreptococcaceae_XI   | Peptostreptococcaeae_XI_G-10   | Peptostreptococcaceae_XI_G-10   |
| ASV121  | Bacteria | Firmicutes | Clostridia | Clostridiales | Peptostreptococcaceae_XI   | Peptostreptococcaeae_XI_G-10   | Peptostreptococcaceae_XI_G-10   |
| ASV364  | Bacteria | Firmicutes | Clostridia | Clostridiales | Peptostreptococcaceae_XI   | Peptostreptococcaeae_XI_G-10   | Peptostreptococcaceae_XI_G-10   |
| ASV485  | Bacteria | Firmicutes | Clostridia | Clostridiales | Peptostreptococcaceae_XI   | Peptostreptococcaeae_XI_G-10   | Peptostreptococcaceae_XI_G-10   |
| ASV540  | Bacteria | Firmicutes | Clostridia | Clostridiales | Peptostreptococcaceae_XI   | Peptostreptococcaeae_XI_G-10   | Peptostreptococcaceae_XI_G-10   |
| ASV1424 | Bacteria | Firmicutes | Clostridia | Clostridiales | Peptostreptococcaceae_[XI] | Peptostreptococcaeae_[XI]      | Peptostreptococcaceae_[XI]      |
| ASV1459 | Bacteria | Firmicutes | Clostridia | Clostridiales | Clostridiales              | Clostridiales                  | Clostridiales                   |
| ASV1683 | Bacteria | Firmicutes | Clostridia | Clostridiales | Clostridiales              | Clostridiales                  | Clostridiales                   |
| ASV321  | Bacteria | Firmicutes | Clostridia | Clostridiales | Peptostreptococcaceae_XI   | Peptostreptococcaeae_XI_G-8    | Peptostreptococcaceae_XI_G-8    |
| ASV1429 | Bacteria | Firmicutes | Clostridia | Clostridiales | Peptostreptococcaceae_XI   | Peptostreptococcaeae_XI_G-8    | Peptostreptococcaceae_XI_G-8    |
| ASV1081 | Bacteria | Firmicutes | Clostridia | Clostridiales | Peptostreptococcaceae_XI   | Peptostreptococcaeae_XI_G-8    | Peptostreptococcaceae_XI_G-8    |
| ASV1167 | Bacteria | Firmicutes | Clostridia | Clostridiales | Peptostreptococcaceae_XI   | Peptostreptococcaeae_XI        | Peptostreptococcaceae_XI        |
| ASV1663 | Bacteria | Firmicutes | Clostridia | Clostridiales | Peptostreptococcaceae_XI   | Peptostreptococcaeae_XI_G-8    | Peptostreptococcaceae_XI_G-8    |
| ASV1442 | Bacteria | Firmicutes | Clostridia | Clostridiales | Peptostreptococcaceae_[XI] | Peptostreptococcaeae_[XI][G-6] | Peptostreptococcaceae_[XI][G-6] |
| ASV1478 | Bacteria | Firmicutes | Clostridia | Clostridiales | Peptostreptococcaceae_[XI] | Peptostreptococcaeae_[XI][G-6] | Peptostreptococcaceae_[XI][G-6] |
| ASV1131 | Bacteria | Firmicutes | Clostridia | Clostridiales | Peptostreptococcaceae_XI   | Peptostreptococcaeae_XI_G-9    | Peptostreptococcaceae_XI_G-9    |

|         |          |            |            |               |                          |                             |                              |
|---------|----------|------------|------------|---------------|--------------------------|-----------------------------|------------------------------|
| ASV982  | Bacteria | Firmicutes | Clostridia | Clostridiales | Peptostreptococcaceae_XI | Peptostreptococcaeae_XI_G-9 | Peptostreptococcaceae_XI_G-9 |
| ASV669  | Bacteria | Firmicutes | Clostridia | Clostridiales | Peptostreptococcaceae_XI | Peptostreptococcaeae_XI_G-9 | Peptostreptococcaceae_XI_G-9 |
| ASV837  | Bacteria | Firmicutes | Clostridia | Clostridiales | Peptostreptococcaceae_XI | Peptostreptococcaeae_XI_G-9 | Peptostreptococcaceae_XI_G-9 |
| ASV1028 | Bacteria | Firmicutes | Clostridia | Clostridiales | Peptostreptococcaceae_XI | Peptostreptococcaeae_XI_G-9 | Peptostreptococcaceae_XI_G-9 |
| ASV62   | Bacteria | Firmicutes | Clostridia | Clostridiales | Peptostreptococcaceae_XI | Proteocatella               | Proteocatella                |
| ASV283  | Bacteria | Firmicutes | Clostridia | Clostridiales | Peptostreptococcaceae_XI | Proteocatella               | Proteocatella_sp._COT_007    |
| ASV716  | Bacteria | Firmicutes | Clostridia | Clostridiales | Peptostreptococcaceae_XI | Proteocatella               | Proteocatella                |
| ASV250  | Bacteria | Firmicutes | Clostridia | Clostridiales | Peptostreptococcaceae_XI | Proteocatella               | Proteocatella_sp._COT_032    |
| ASV87   | Bacteria | Firmicutes | Clostridia | Clostridiales | Peptostreptococcaceae_XI | Proteocatella               | Proteocatella_sp._COT_032    |
| ASV1083 | Bacteria | Firmicutes | Clostridia | Clostridiales | Peptostreptococcaceae_XI | Proteocatella               | Proteocatella                |
| ASV1238 | Bacteria | Firmicutes | Clostridia | Clostridiales | Peptostreptococcaceae_XI | Proteocatella               | Proteocatella_sp._COT_058    |
| ASV1710 | Bacteria | Firmicutes | Clostridia | Clostridiales | Lachnospiraceae_[XIV]    | Lachnospiraceae_[G-8]       | Lachnospiraceae_[G-8]        |
| ASV1105 | Bacteria | Firmicutes | Clostridia | Clostridiales | Peptostreptococcaceae_XI | Clostridium_XI              | Clostridium_XI               |
| ASV1319 | Bacteria | Firmicutes | Clostridia | Clostridiales | Peptostreptococcaceae    | Clostridium_XI              | Clostridium_XI               |
| ASV1499 | Bacteria | Firmicutes | Clostridia | Clostridiales | Peptostreptococcaceae    | Peptostreptococcus          | Peptostreptococcus           |
| ASV401  | Bacteria | Firmicutes | Clostridia | Clostridiales | Peptostreptococcaceae_XI | Peptostreptococcus          | Peptostreptococcus           |
| ASV850  | Bacteria | Firmicutes | Clostridia | Clostridiales | Peptostreptococcaceae    | Peptostreptococcus          | Peptostreptococcus           |

|         |          |            |            |               |                            |                                 |                                 |
|---------|----------|------------|------------|---------------|----------------------------|---------------------------------|---------------------------------|
| ASV197  | Bacteria | Firmicutes | Clostridia | Clostridiales | Peptostreptococcaceae      | Peptostreptococcus              | Peptostreptococcus_anaerobius   |
| ASV1200 | Bacteria | Firmicutes | Clostridia | Clostridiales | Peptostreptococcaceae      | Peptostreptococcus              | Peptostreptococcus              |
| ASV107  | Bacteria | Firmicutes | Clostridia | Clostridiales | Peptostreptococcaceae_XI   | Filifactor                      | Filifactor                      |
| ASV234  | Bacteria | Firmicutes | Clostridia | Clostridiales | Peptostreptococcaceae_XI   | Filifactor                      | Filifactor_sp._COT_163          |
| ASV1186 | Bacteria | Firmicutes | Clostridia | Clostridiales | Peptostreptococcaceae_XI   | Filifactor                      | Filifactor                      |
| ASV68   | Bacteria | Firmicutes | Clostridia | Clostridiales | Peptostreptococcaceae_XI   | Filifactor                      | Filifactor                      |
| ASV177  | Bacteria | Firmicutes | Clostridia | Clostridiales | Peptostreptococcaceae      | Filifactor                      | Filifactor                      |
| ASV43   | Bacteria | Firmicutes | Clostridia | Clostridiales | Peptostreptococcaceae_XI   | Peptostreptococcaceae_XI_G-2    | Peptostreptococcaceae_XI_G-2    |
| ASV1048 | Bacteria | Firmicutes | Clostridia | Clostridiales | Peptostreptococcaceae_XI   | Peptostreptococcaceae_XI_G-2    | Peptostreptococcaceae_XI_G-2    |
| ASV246  | Bacteria | Firmicutes | Clostridia | Clostridiales | Peptostreptococcaceae_XI   | Peptostreptococcaceae_XI_G-2    | Peptostreptococcaceae_XI_G-2    |
| ASV149  | Bacteria | Firmicutes | Clostridia | Clostridiales | Peptostreptococcaceae_XI   | Peptostreptococcaceae_XI_G-2    | Peptostreptococcaceae_XI_G-2    |
| ASV1297 | Bacteria | Firmicutes | Clostridia | Clostridiales | Peptostreptococcaceae_XI   | Peptostreptococcaceae_XI_G-2    | Peptostreptococcaceae_XI_G-2    |
| ASV728  | Bacteria | Firmicutes | Clostridia | Clostridiales | Peptostreptococcaceae_XI   | Peptostreptococcaceae_XI_G-2    | Peptostreptococcaceae_XI_G-2    |
| ASV185  | Bacteria | Firmicutes | Clostridia | Clostridiales | Peptostreptococcaceae_[XI] | Peptostreptococcaceae_[XI][G-7] | Peptostreptococcaceae_[XI][G-7] |
| ASV1182 | Bacteria | Firmicutes | Clostridia | Clostridiales | Peptostreptococcaceae_XI   | Peptostreptococcaceae_XI_G-2    | Peptostreptococcaceae_XI_G-2    |
| ASV1305 | Bacteria | Firmicutes | Clostridia | Clostridiales | Peptostreptococcaceae_XI   | Peptostreptococcaceae_XI_G-2    | Peptostreptococcaceae_XI_G-2    |
| ASV476  | Bacteria | Firmicutes | Clostridia | Clostridiales | Peptostreptococcaceae_XI   | Peptostreptococcaceae_XI_G-1    | Peptostreptococcaceae_XI_G-1    |



|        |          |            |            |               |                          |                             |                              |
|--------|----------|------------|------------|---------------|--------------------------|-----------------------------|------------------------------|
| ASV164 | Bacteria | Firmicutes | Clostridia | Clostridiales | Peptostreptococcaceae_XI | Peptostreptococcaeae_XI_G-1 | Peptostreptococcaceae_XI_G-1 |
| ASV836 | Bacteria | Firmicutes | Clostridia | Clostridiales | Peptostreptococcaceae_XI | Peptostreptococcaeae_XI_G-1 | Peptostreptococcaceae_XI_G-1 |

## Appendix References:

Chen T, Yu W-H, Izard J, Baranova OV, Lakshmanan A, Dewhirst FE (2010) The Human Oral Microbiome Database: a web accessible resource for investigating oral microbe taxonomic and genomic information. *Database*, aq013, doi: 10.1093/database/baq013.

Callahan BJ, McMurdie PJ, Rosen MJ, Han AW, Johnson AJA, Holmes SP (2016) DADA2: high-resolution sample inference from Illumina amplicon data. *Nature Methods*, 13(7), 581.

Dewhirst FE, Klein EA, Thompson EC, Blanton JM, Chen T, Milella L, et al. (2012) The Canine Oral Microbiome. *PLoS ONE*, 7(4): e36067.

Martin M (2011) Cutadapt removes adapter sequences from high-throughput sequencing reads. *EMBnet.Journal*, 17(1):10-2.

Price MN, Dehal PS, Arkin AP (2010) FastTree 2—approximately maximum-likelihood trees for large alignments. *PloS ONE*, 5(3):e9490.

Schloss PD, Westcott SL, Ryabin T, Hall JR, Hartmann M, Hollister EB, Lesniewski RA, Oakley BB, Parks DH, Robinson CJ, Sahl JW (2009) Introducing mothur: open-source, platform-independent, community-supported software for describing and comparing microbial communities. *Applied and Environmental Microbiology*, 75(23):7537-41.

Tong WM, Chan Y. (2020). GenePiper: a graphical user interface tool for microbiome sequence data mining. *Microbiology Resource Announcements* 9:e01195-19. <https://doi.org/10.1128/MRA.01195-19>.

Van den Brink PJ, Braak CJ (1999). Principal response curves: Analysis of time-dependent multivariate responses of biological community to stress. *Environmental Toxicology and Chemistry: An International Journal*, 18(2):138-48.

Wang Q, Garrity GM, Tiedje JM, Cole JR (2007) Naive Bayesian classifier for rapid assignment of rRNA sequences into the new bacterial taxonomy. *Applied and Environmental Microbiology*, 73(16):5261-7.

Weiss S, Xu ZZ, Peddada S, Amir A, Bittinger K, Gonzalez A, Lozupone C, Zaneveld JR, Vázquez-Baeza Y, Birmingham A, Hyde ER (2017) Normalization and microbial differential abundance strategies depend upon data characteristics. *Microbiome*, 5(1):27.
